# Supplementary material
Source: HighWire-hosted journal article supplement (https://erj.ersjournals.com/content/57/6/2002591)
Supplement: inline-supplementary-material-2 [file inline-supplementary-material-2.xlsx]

## Sheet: Supplemental Table S1
Supplemental Table S1 - MYRIAD RBM Discovery Panel Proteins passing Quality Control
Protein Name	Measured in DETECT Cohort	Measured in Sheffield Confirmatory Cohort
Alpha 1 Antichymotrypsin	Yes	NA
Angiopoietin related protein 3	Yes	NA
Apolipoprotein A IV	Yes	NA
Cadherin 13	Yes	NA
Cartilage Oligomeric Matrix Protein	Yes	NA
CD 40 antigen	Yes	NA
Chemerin	Yes	NA
Complement component C1q receptor	Yes	NA
Cortisol	Yes	NA
Creatine Kinase MB	Yes	NA
Fibroblast Growth Factor basic	Yes	NA
Glutathione S Transferase alpha	Yes	NA
Insulin like Growth Factor Binding Protein 3	Yes	NA
Insulin like Growth Factor Binding Protein 4	Yes	NA
Insulin like Growth Factor Binding Protein 5	Yes	NA
Insulin like Growth Factor Binding Protein 6	Yes	NA
Lumican	Yes	NA
Midkine	Yes	NA
Pentraxin 3	Yes	NA
Peptidase D	Yes	NA
Peptide YY	Yes	NA
Progesterone	Yes	NA
Selenoprotein P	Yes	NA
Serotransferrin	Yes	NA
Serum Amyloid P Component	Yes	NA
Testosterone, Total	Yes	NA
Thrombospondin 4	Yes	NA
Transforming Growth Factor alpha	Yes	NA
Tyrosine kinase with Ig and EGF homology domains 1	Yes	NA
Vascular Endothelial Growth Factor C	Yes	NA
Vascular endothelial growth factor receptor 3	Yes	NA
A disintegrin and metalloproteinase with thrombospondin motifs 8	NA	Yes
Adrenomedullin	NA	Yes
Aggrecan core protein	NA	Yes
Angiopoietin related protein 4	NA	Yes
Beta Amyloid 1 40	NA	Yes
Beta Amyloid 1 42	NA	Yes
Betacellulin	NA	Yes
Calbindin	NA	Yes
C C motif chemokine 15	NA	Yes
Ceruloplasmin	NA	Yes
Ciliary Neurotrophic Factor	NA	Yes
Complement Factor H	NA	Yes
Dopamine beta hydroxylase	NA	Yes
Eotaxin 3	NA	Yes
Epithelial cell adhesion molecule	NA	Yes
Erythropoietin	NA	Yes
Fas Ligand	NA	Yes
Fibrinogen	NA	Yes
Folate receptor gamma	NA	Yes
Glutathione S Transferase Mu 1	NA	Yes
Granulocyte Macrophage Colony Stimulating Factor	NA	Yes
Growth/differentiation factor 11	NA	Yes
Heat Shock protein 70	NA	Yes
Interferon gamma	NA	Yes
Interleukin 1 alpha	NA	Yes
Interleukin 1 beta	NA	Yes
Interleukin 1 receptor antagonist	NA	Yes
Interleukin 2	NA	Yes
Interleukin 3	NA	Yes
Interleukin 4	NA	Yes
Interleukin 5	NA	Yes
Interleukin 6	NA	Yes
Interleukin 7	NA	Yes
Interleukin 12 Subunit p70	NA	Yes
Interleukin 13	NA	Yes
Interleukin 15	NA	Yes
Interleukin 17	NA	Yes
Interleukin 23	NA	Yes
Interleukin 31	NA	Yes
Kallikrein 7	NA	Yes
Maspin	NA	Yes
MHC class I chain related protein A	NA	Yes
Monocyte Chemotactic Protein 3	NA	Yes
Nerve Growth Factor beta	NA	Yes
Neurofilament heavy polypeptide	NA	Yes
Peroxiredoxin 4	NA	Yes
Protein DJ 1	NA	Yes
Protein S100 A6	NA	Yes
Sclerostin	NA	Yes
Secreted protein acidic and rich in cysteine	NA	Yes
Transferrin receptor protein 1	NA	Yes
Transforming Growth Factor beta 3	NA	Yes
Tumor Necrosis Factor alpha	NA	Yes
Tumor Necrosis Factor beta	NA	Yes
Uteroglobin	NA	Yes
Bone morphogenetic protein 9	NA	Yes
6Ckine	Yes	Yes
Adiponectin	Yes	Yes
Aldose Reductase	Yes	Yes
Alpha 1 acid glycoprotein 1	Yes	Yes
Alpha 1 Antitrypsin	Yes	Yes
Alpha 1 Microglobulin	Yes	Yes
Alpha 2 Macroglobulin	Yes	Yes
Alpha Fetoprotein	Yes	Yes
Amphiregulin	Yes	Yes
Angiogenin	Yes	Yes
Angiopoietin 1	Yes	Yes
Angiopoietin 2	Yes	Yes
Angiotensin Converting Enzyme	Yes	Yes
Antileukoproteinase	Yes	Yes
Antithrombin III	Yes	Yes
Apolipoprotein(a)	Yes	Yes
Apolipoprotein A I	Yes	Yes
Apolipoprotein A II	Yes	Yes
Apolipoprotein B	Yes	Yes
Apolipoprotein C I	Yes	Yes
Apolipoprotein C III	Yes	Yes
Apolipoprotein D	Yes	Yes
Apolipoprotein E	Yes	Yes
Apolipoprotein H	Yes	Yes
AXL Receptor Tyrosine Kinase	Yes	Yes
B cell activating factor	Yes	Yes
B Lymphocyte Chemoattractant	Yes	Yes
Beta 2 Microglobulin	Yes	Yes
Beta microseminoprotein	Yes	Yes
Brain Derived Neurotrophic Factor	Yes	Yes
C Peptide	Yes	Yes
C Reactive Protein	Yes	Yes
Cadherin 1	Yes	Yes
Cancer Antigen 125	Yes	Yes
Cancer Antigen 15 3	Yes	Yes
Cancer Antigen 19 9	Yes	Yes
Carbonic anhydrase 9	Yes	Yes
Carcinoembryonic Antigen	Yes	Yes
Carcinoembryonic antigen related cell adhesion molecule 1	Yes	Yes
Carcinoembryonic antigen related cell adhesion molecule 6	Yes	Yes
Cathepsin B	Yes	Yes
Cathepsin D	Yes	Yes
CD5 Antigen like	Yes	Yes
CD27 antigen	Yes	Yes
CD40 Ligand	Yes	Yes
CD163	Yes	Yes
Cellular Fibronectin	Yes	Yes
Chemokine CC 4	Yes	Yes
Chromogranin A	Yes	Yes
Clusterin	Yes	Yes
Collagen IV	Yes	Yes
Complement C3	Yes	Yes
Complement Factor H Related Protein 1	Yes	Yes
Cystatin A	Yes	Yes
Cystatin B	Yes	Yes
Cystatin C	Yes	Yes
Decorin	Yes	Yes
Dickkopf related protein 1	Yes	Yes
Dipeptidyl peptidase IV	Yes	Yes
E Selectin	Yes	Yes
EN RAGE	Yes	Yes
Endoglin	Yes	Yes
Endostatin	Yes	Yes
Eotaxin 1	Yes	Yes
Eotaxin 2	Yes	Yes
Epidermal Growth Factor	Yes	Yes
Epidermal Growth Factor Receptor	Yes	Yes
Epiregulin	Yes	Yes
Epithelial Derived Neutrophil Activating Protein 78	Yes	Yes
Factor VII	Yes	Yes
FASLG Receptor	Yes	Yes
Fatty Acid Binding Protein, adipocyte	Yes	Yes
Fatty Acid Binding Protein, heart	Yes	Yes
Fatty Acid Binding Protein, liver	Yes	Yes
Ferritin	Yes	Yes
Fetuin A	Yes	Yes
Fibroblast Growth Factor 21	Yes	Yes
Fibroblast growth factor 23	Yes	Yes
Fibulin 1C	Yes	Yes
Ficolin 3	Yes	Yes
Follicle Stimulating Hormone	Yes	Yes
Galectin 3	Yes	Yes
Gastric inhibitory polypeptide	Yes	Yes
Gelsolin	Yes	Yes
Glucagon like Peptide 1, total	Yes	Yes
Glucose 6 phosphate Isomerase	Yes	Yes
Glycogen phosphorylase isoenzyme BB	Yes	Yes
Granulocyte Colony Stimulating Factor	Yes	Yes
Growth/differentiation factor 15	Yes	Yes
Growth Hormone	Yes	Yes
Growth Regulated alpha protein	Yes	Yes
Haptoglobin	Yes	Yes
HE4	Yes	Yes
Hemopexin	Yes	Yes
Heparin Binding EGF Like Growth Factor	Yes	Yes
Hepatocyte Growth Factor	Yes	Yes
Hepatocyte Growth Factor receptor	Yes	Yes
Hepsin	Yes	Yes
Human Chorionic Gonadotropin beta	Yes	Yes
Human Epidermal Growth Factor Receptor 2	Yes	Yes
Immunoglobulin A	Yes	Yes
Immunoglobulin E	Yes	Yes
Immunoglobulin M	Yes	Yes
Insulin	Yes	Yes
Insulin like Growth Factor Binding Protein 1	Yes	Yes
Insulin like Growth Factor Binding Protein 2	Yes	Yes
Insulin like Growth Factor Binding Protein 7	Yes	Yes
Intercellular Adhesion Molecule 1	Yes	Yes
Interferon alpha	Yes	Yes
Interferon gamma Induced Protein 10	Yes	Yes
Interferon inducible T cell alpha chemoattractant	Yes	Yes
Interleukin 1 receptor type 1	Yes	Yes
Interleukin 1 receptor type 2	Yes	Yes
Interleukin 2 receptor alpha	Yes	Yes
Interleukin 6 receptor	Yes	Yes
Interleukin 6 receptor subunit beta	Yes	Yes
Interleukin 8	Yes	Yes
Interleukin 10	Yes	Yes
Interleukin 12 Subunit p40	Yes	Yes
Interleukin 16	Yes	Yes
Interleukin 18	Yes	Yes
Interleukin 18 binding protein	Yes	Yes
Interleukin 22	Yes	Yes
Kallikrein 5	Yes	Yes
Kidney Injury Molecule 1	Yes	Yes
Lactoferrin	Yes	Yes
Lactoylglutathione lyase	Yes	Yes
Latency Associated Peptide of Transforming Growth Factor beta 1	Yes	Yes
Lectin Like Oxidized LDL Receptor 1	Yes	Yes
Leptin	Yes	Yes
Leptin Receptor	Yes	Yes
Leucine rich alpha 2 glycoprotein	Yes	Yes
Lipocalin 1	Yes	Yes
Luteinizing Hormone	Yes	Yes
Macrophage Colony Stimulating Factor 1	Yes	Yes
Macrophage Derived Chemokine	Yes	Yes
Macrophage Inflammatory Protein 1 alpha	Yes	Yes
Macrophage Inflammatory Protein 1 beta	Yes	Yes
Macrophage Inflammatory Protein 3 alpha	Yes	Yes
Macrophage inflammatory protein 3 beta	Yes	Yes
Macrophage Migration Inhibitory Factor	Yes	Yes
Macrophage Stimulating Protein	Yes	Yes
Mast/stem cell growth factor receptor	Yes	Yes
Matrix Metalloproteinase 1	Yes	Yes
Matrix Metalloproteinase 2	Yes	Yes
Matrix Metalloproteinase 3	Yes	Yes
Matrix Metalloproteinase 7	Yes	Yes
Matrix Metalloproteinase 9	Yes	Yes
Matrix Metalloproteinase 9, total	Yes	Yes
Matrix Metalloproteinase 10	Yes	Yes
Mesothelin	Yes	Yes
Monocyte Chemotactic Protein 1	Yes	Yes
Monocyte Chemotactic Protein 2	Yes	Yes
Monocyte Chemotactic Protein 4	Yes	Yes
Monokine Induced by Gamma Interferon	Yes	Yes
Myeloid Progenitor Inhibitory Factor 1	Yes	Yes
Myeloperoxidase	Yes	Yes
Myoglobin	Yes	Yes
N terminal prohormone of brain natriuretic peptide	Yes	Yes
Neuron Specific Enolase	Yes	Yes
Neuronal Cell Adhesion Molecule	Yes	Yes
Neuropilin 1	Yes	Yes
Neutrophil Activating Peptide 2	Yes	Yes
Neutrophil Gelatinase Associated Lipocalin	Yes	Yes
Omentin	Yes	Yes
Osteocalcin	Yes	Yes
Osteopontin	Yes	Yes
Osteoprotegerin	Yes	Yes
P Selectin	Yes	Yes
Pancreatic Polypeptide	Yes	Yes
Pancreatic secretory trypsin inhibitor	Yes	Yes
Paraoxanase 1	Yes	Yes
Pepsinogen I	Yes	Yes
Periostin	Yes	Yes
Phosphoserine Aminotransferase	Yes	Yes
Pigment Epithelium Derived Factor	Yes	Yes
Placenta Growth Factor	Yes	Yes
Plasminogen Activator Inhibitor 1	Yes	Yes
Platelet endothelial cell adhesion molecule	Yes	Yes
Platelet Derived Growth Factor BB	Yes	Yes
Progranulin	Yes	Yes
Prolactin	Yes	Yes
Prostasin	Yes	Yes
Prostate Specific Antigen, Free	Yes	Yes
Prostate Specific Antigen, total	Yes	Yes
Pulmonary and Activation Regulated Chemokine	Yes	Yes
Pulmonary surfactant associated protein D	Yes	Yes
Receptor for advanced glycosylation end products	Yes	Yes
Receptor tyrosine protein kinase erbB 3	Yes	Yes
Resistin	Yes	Yes
Retinol binding protein 4	Yes	Yes
S100 calcium binding protein B	Yes	Yes
Serum Amyloid A Protein	Yes	Yes
Sex Hormone Binding Globulin	Yes	Yes
Sortilin	Yes	Yes
Squamous Cell Carcinoma Antigen 1	Yes	Yes
ST2	Yes	Yes
Stem Cell Factor	Yes	Yes
Stromal cell derived factor 1	Yes	Yes
Superoxide Dismutase 1, soluble	Yes	Yes
T Cell Specific Protein RANTES	Yes	Yes
T Lymphocyte Secreted Protein I 309	Yes	Yes
Tamm Horsfall Urinary Glycoprotein	Yes	Yes
Tenascin C	Yes	Yes
Tenascin X	Yes	Yes
Tetranectin	Yes	Yes
Thrombin activable fibrinolysis inhibitor	Yes	Yes
Thrombomodulin	Yes	Yes
Thrombospondin 1	Yes	Yes
Thymus and activation regulated chemokine	Yes	Yes
Thymus Expressed Chemokine	Yes	Yes
Thyroglobulin	Yes	Yes
Thyroid Stimulating Hormone	Yes	Yes
Thyroxine Binding Globulin	Yes	Yes
Tissue Inhibitor of Metalloproteinases 1	Yes	Yes
Tissue Inhibitor of Metalloproteinases 2	Yes	Yes
Tissue Inhibitor of Metalloproteinases 3	Yes	Yes
Tissue type Plasminogen activator	Yes	Yes
TNF Related Apoptosis Inducing Ligand Receptor 3	Yes	Yes
Transthyretin	Yes	Yes
Trefoil Factor 3	Yes	Yes
Tumor necrosis factor ligand superfamily member 12	Yes	Yes
Tumor necrosis factor ligand superfamily member 13	Yes	Yes
Tumor Necrosis Factor Receptor I	Yes	Yes
Tumor necrosis factor receptor 2	Yes	Yes
Tyrosine kinase with Ig and EGF homology domains 2	Yes	Yes
Urokinase type Plasminogen Activator	Yes	Yes
Urokinase type plasminogen activator receptor	Yes	Yes
Vascular Cell Adhesion Molecule 1	Yes	Yes
Vascular Endothelial Growth Factor	Yes	Yes
Vascular endothelial growth factor D	Yes	Yes
Vascular Endothelial Growth Factor Receptor 1	Yes	Yes
Vascular Endothelial Growth Factor Receptor 2	Yes	Yes
Visceral adipose tissue derived serpin A12	Yes	Yes
Visfatin	Yes	Yes
Vitamin D Binding Protein	Yes	Yes
Vitamin K Dependent Protein S	Yes	Yes
Vitronectin	Yes	Yes
von Willebrand Factor	Yes	Yes
YKL 40	Yes	Yes
