# Supplementary material
Source: HighWire-hosted journal article supplement (https://erj.ersjournals.com/content/57/6/2002591)
Supplement: inline-supplementary-material-3 [file inline-supplementary-material-3.pdf]

**Supplemental Table S2: Serum concentrations of the eight common analytes in DETECT serum patients with diffuse compared to limited SSc.**

|    | Analyte                     | MeanDecreaseGini | patient type | mean        | sd          | min  | Q1    | median | Q3     | max   | p.wilcox    |
|----|-----------------------------|------------------|--------------|-------------|-------------|------|-------|--------|--------|-------|-------------|
| 1  | RAGE (v248) [ng/mL]         | 2.157637526      | All          | 7.504458599 | 9.400058333 | 0.08 | 1.1   | 2.8    | 11     | 42    | NA          |
| 2  | RAGE (v248) [ng/mL]         | 2.157637526      | Non_PH       | 3.562375    | 4.644035304 | 0.08 | 0.79  | 1.65   | 3.95   | 24    | NA          |
| 3  | RAGE (v248) [ng/mL]         | 2.157637526      | PH           | 11.60012987 | 11.20719512 | 0.08 | 1.9   | 7.4    | 20     | 42    | 3.64E-07    |
| 4  | IGFBP-7 (v138) [ng/mL]      | 1.407871854      | All          | 49.36942675 | 13.94277987 | 20   | 40    | 47     | 58     | 92    | NA          |
| 5  | IGFBP-7 (v138) [ng/mL]      | 1.407871854      | Non_PH       | 44.5375     | 12.13942604 | 20   | 37    | 43     | 49     | 91    | NA          |
| 6  | IGFBP-7 (v138) [ng/mL]      | 1.407871854      | PH           | 54.38961039 | 13.99074491 | 25   | 45    | 53     | 62     | 92    | 2.60E-06    |
| 7  | Endostatin (v078) [ng/mL]   | 1.377863793      | All          | 121.4267516 | 40.17513005 | 43   | 91    | 117    | 140    | 297   | NA          |
| 8  | Endostatin (v078) [ng/mL]   | 1.377863793      | Non_PH       | 110.2375    | 38.15897583 | 43   | 80.75 | 99.5   | 128.25 | 207   | NA          |
| 9  | Endostatin (v078) [ng/mL]   | 1.377863793      | PH           | 133.0519481 | 39.12459722 | 57   | 107   | 128    | 147    | 297   | 3.12E-05    |
| 10 | Collagen IV (v063) [ng/mL]  | 1.368275677      | All          | 204.4649682 | 148.917527  | 22   | 101   | 156    | 261    | 677   | NA          |
| 11 | Collagen IV (v063) [ng/mL]  | 1.368275677      | Non_PH       | 153.85      | 99.88044752 | 26   | 87.25 | 134.5  | 201.75 | 580   | NA          |
| 12 | Collagen IV (v063) [ng/mL]  | 1.368275677      | PH           | 257.0519481 | 172.1965597 | 22   | 109   | 208    | 374    | 677   | 9.36E-05    |
| 13 | MMP-2 (v195) [ng/mL]        | 1.243937651      | All          | 1696.993631 | 473.3160095 | 341  | 1370  | 1610   | 1950   | 3320  | NA          |
| 14 | MMP-2 (v195) [ng/mL]        | 1.243937651      | Non_PH       | 1562.7125   | 427.6131043 | 579  | 1280  | 1460   | 1792.5 | 2840  | NA          |
| 15 | MMP-2 (v195) [ng/mL]        | 1.243937651      | PH           | 1836.506494 | 480.703449  | 341  | 1520  | 1770   | 2160   | 3320  | 3.98E-05    |
| 16 | TIMP-2 (v281) [ng/mL]       | 1.086338466      | All          | 83.69426752 | 16.82590433 | 30   | 70    | 82     | 93     | 146   | NA          |
| 17 | TIMP-2 (v281) [ng/mL]       | 1.086338466      | Non_PH       | 79.025      | 15.09629429 | 54   | 67    | 74.5   | 87     | 119   | NA          |
| 18 | TIMP-2 (v281) [ng/mL]       | 1.086338466      | PH           | 88.54545455 | 17.24631574 | 30   | 78    | 87     | 98     | 146   | 4.54E-05    |
| 19 | NT proBNP (v211) [pg/mL]    | 1.018179888      | All          | 1087.394904 | 1689.708432 | 8    | 215   | 559    | 1120   | 12400 | NA          |
| 20 | NT proBNP (v211) [pg/mL]    | 1.018179888      | Non_PH       | 691.575     | 1108.451592 | 8    | 149.5 | 375    | 795.75 | 8080  | NA          |
| 21 | NT proBNP (v211) [pg/mL]    | 1.018179888      | PH           | 1498.636364 | 2060.841901 | 8    | 404   | 913    | 1640   | 12400 | 4.53E-05    |
| 22 | Neuropilin-1 (v215) [ng/mL] | 0.944577145      | All          | 234.7070064 | 73.12574884 | 106  | 179   | 221    | 275    | 441   | NA          |
| 23 | Neuropilin-1 (v215) [ng/mL] | 0.944577145      | Non_PH       | 214.95      | 68.45564026 | 106  | 170   | 201.5  | 237    | 382   | NA          |
| 24 | Neuropilin-1 (v215) [ng/mL] | 0.944577145      | PH           | 255.2337662 | 72.57589423 | 117  | 198   | 241    | 290    | 441   | 0.000170559 |
| 25 | ALP (v017) [ng/mL]          | 0.907595397      | All          | 40.06687898 | 12.27686687 | 5.5  | 32    | 39     | 47     | 87    | NA          |
| 26 | ALP (v017) [ng/mL]          | 0.907595397      | Non_PH       | 37.69375    | 13.03391238 | 5.5  | 29    | 34     | 43.25  | 87    | NA          |
| 27 | ALP (v017) [ng/mL]          | 0.907595397      | PH           | 42.53246753 | 10.98633651 | 21   | 36    | 42     | 49     | 79    | 0.001072287 |

|    |                           |             |        |             |             |        |        |       |        |       |             |
|----|---------------------------|-------------|--------|-------------|-------------|--------|--------|-------|--------|-------|-------------|
| 28 | Cystatin-C (v071) [ng/mL] | 0.880869413 | All    | 1074.152866 | 286.8329981 | 561    | 884    | 1030  | 1230   | 2060  | NA          |
| 29 | Cystatin-C (v071) [ng/mL] | 0.880869413 | Non_PH | 1010.7875   | 291.4279421 | 561    | 806.25 | 951.5 | 1120   | 2050  | NA          |
| 30 | Cystatin-C (v071) [ng/mL] | 0.880869413 | PH     | 1139.987013 | 268.2836036 | 568    | 984    | 1100  | 1240   | 2060  | 0.000299979 |
| 31 | SP-D (v247) [ng/mL]       | 0.88023308  | All    | 27.71019108 | 17.7224079  | 3.3    | 16     | 24    | 37     | 121   | NA          |
| 32 | SP-D (v247) [ng/mL]       | 0.88023308  | Non_PH | 22.81875    | 13.66041212 | 3.3    | 12.75  | 20    | 30     | 76    | NA          |
| 33 | SP-D (v247) [ng/mL]       | 0.88023308  | PH     | 32.79220779 | 19.98432126 | 5.3    | 20     | 28    | 40     | 121   | 0.000533327 |
| 34 | PPP (v223) [pg/mL]        | 0.770204927 | All    | 222.6178344 | 246.5582974 | 14     | 70     | 145   | 278    | 2060  | NA          |
| 35 | PPP (v223) [pg/mL]        | 0.770204927 | Non_PH | 205.0625    | 286.8499076 | 14     | 53.5   | 113   | 236    | 2060  | NA          |
| 36 | PPP (v223) [pg/mL]        | 0.770204927 | PH     | 240.8571429 | 196.4412805 | 30     | 89     | 156   | 324    | 716   | 0.012230813 |
| 37 | VCAM-1 (v299) [ng/mL]     | 0.734830955 | All    | 660.9745223 | 315.4324047 | 247    | 484    | 574   | 753    | 2440  | NA          |
| 38 | VCAM-1 (v299) [ng/mL]     | 0.734830955 | Non_PH | 599.6875    | 280.7011832 | 247    | 434.5  | 536   | 646.75 | 2300  | NA          |
| 39 | VCAM-1 (v299) [ng/mL]     | 0.734830955 | PH     | 724.6493506 | 338.0338572 | 352    | 529    | 656   | 786    | 2440  | 0.000439944 |
| 40 | IGFBP-2 (v133) [ng/mL]    | 0.715134658 | All    | 197.3694268 | 89.37312212 | 36     | 137    | 182   | 257    | 574   | NA          |
| 41 | IGFBP-2 (v133) [ng/mL]    | 0.715134658 | Non_PH | 186.4       | 102.5371313 | 36     | 104.25 | 169.5 | 244    | 574   | NA          |
| 42 | IGFBP-2 (v133) [ng/mL]    | 0.715134658 | PH     | 208.7662338 | 72.1690078  | 37     | 153    | 203   | 260    | 387   | 0.030002337 |
| 43 | CA-9 (v045) [ng/mL]       | 0.694458374 | All    | 0.219235669 | 0.158282211 | 0.09   | 0.09   | 0.2   | 0.27   | 0.98  | NA          |
| 44 | CA-9 (v045) [ng/mL]       | 0.694458374 | Non_PH | 0.179       | 0.131279969 | 0.09   | 0.09   | 0.09  | 0.23   | 0.66  | NA          |
| 45 | CA-9 (v045) [ng/mL]       | 0.694458374 | PH     | 0.261038961 | 0.173308247 | 0.09   | 0.09   | 0.24  | 0.34   | 0.98  | 0.000196689 |
| 46 | MSLN (v201) [nM]          | 0.658890944 | All    | 56.48598726 | 31.66319237 | 6.3    | 36     | 50    | 70     | 191   | NA          |
| 47 | MSLN (v201) [nM]          | 0.658890944 | Non_PH | 60.7875     | 36.3780062  | 12     | 34     | 54    | 74     | 191   | NA          |
| 48 | MSLN (v201) [nM]          | 0.658890944 | PH     | 52.01688312 | 25.3490029  | 6.3    | 37     | 49    | 58     | 164   | 0.278617848 |
| 49 | ANG-2 (v014) [ng/mL]      | 0.654694364 | All    | 8.201910828 | 6.47583745  | 1.8    | 5      | 6.5   | 9.4    | 45    | NA          |
| 50 | ANG-2 (v014) [ng/mL]      | 0.654694364 | Non_PH | 6.92        | 5.211875437 | 2      | 4.2    | 5.9   | 8.05   | 45    | NA          |
| 51 | ANG-2 (v014) [ng/mL]      | 0.654694364 | PH     | 9.533766234 | 7.370024823 | 1.8    | 5.2    | 7.3   | 11     | 45    | 0.0021923   |
| 52 | MIP-3 beta (v189) [pg/mL] | 0.623668111 | All    | 830.3630573 | 815.6876535 | 42     | 424    | 565   | 920    | 5670  | NA          |
| 53 | MIP-3 beta (v189) [pg/mL] | 0.623668111 | Non_PH | 721.9375    | 808.3699389 | 42     | 358    | 510.5 | 652.5  | 5670  | NA          |
| 54 | MIP-3 beta (v189) [pg/mL] | 0.623668111 | PH     | 943.012987  | 813.1559456 | 282    | 446    | 602   | 1010   | 4070  | 0.006001658 |
| 55 | CD5L (v052) [ng/mL]       | 0.612749195 | All    | 3512.566879 | 1921.713102 | 963    | 2420   | 3050  | 4170   | 16700 | NA          |
| 56 | CD5L (v052) [ng/mL]       | 0.612749195 | Non_PH | 3140.7875   | 1540.843429 | 963    | 2222.5 | 2755  | 3765   | 9230  | NA          |
| 57 | CD5L (v052) [ng/mL]       | 0.612749195 | PH     | 3898.831169 | 2194.482899 | 1710   | 2690   | 3450  | 4340   | 16700 | 0.002185746 |
| 58 | FGF-23 (v098) [ng/mL]     | 0.598754567 | All    | 0.221968153 | 0.206363638 | 0.0485 | 0.1    | 0.17  | 0.28   | 1.7   | NA          |
| 59 | FGF-23 (v098) [ng/mL]     | 0.598754567 | Non_PH | 0.182925    | 0.170621706 | 0.0485 | 0.0485 | 0.15  | 0.23   | 1.2   | NA          |
| 60 | FGF-23 (v098) [ng/mL]     | 0.598754567 | PH     | 0.262532468 | 0.232122038 | 0.0485 | 0.15   | 0.2   | 0.32   | 1.7   | 0.001387281 |

|    |                             |             |        |             |             |       |        |       |        |        |             |
|----|-----------------------------|-------------|--------|-------------|-------------|-------|--------|-------|--------|--------|-------------|
| 61 | MMP-9, total (v199) [ng/mL] | 0.594539294 | All    | 1468.980892 | 524.8865747 | 325   | 1070   | 1470  | 1780   | 2650   | NA          |
| 62 | MMP-9, total (v199) [ng/mL] | 0.594539294 | Non_PH | 1580.975    | 547.3769898 | 619   | 1095   | 1560  | 1940   | 2650   | NA          |
| 63 | MMP-9, total (v199) [ng/mL] | 0.594539294 | PH     | 1352.623377 | 476.5956037 | 325   | 1050   | 1360  | 1640   | 2550   | 0.010470679 |
| 64 | TIMP-1 (v280) [ng/mL]       | 0.555521187 | All    | 172.8535032 | 50.30010135 | 95    | 140    | 165   | 188    | 421    | NA          |
| 65 | TIMP-1 (v280) [ng/mL]       | 0.555521187 | Non_PH | 167.1625    | 56.42502447 | 98    | 131.75 | 157.5 | 175.25 | 421    | NA          |
| 66 | TIMP-1 (v280) [ng/mL]       | 0.555521187 | PH     | 178.7662338 | 42.59568056 | 95    | 149    | 174   | 200    | 303    | 0.005839321 |
| 67 | Eotaxin-2 (v080) [pg/mL]    | 0.548358411 | All    | 1196.66879  | 937.7180593 | 204   | 598    | 986   | 1370   | 6800   | NA          |
| 68 | Eotaxin-2 (v080) [pg/mL]    | 0.548358411 | Non_PH | 1086.05     | 900.1434049 | 204   | 555.75 | 866.5 | 1275   | 6790   | NA          |
| 69 | Eotaxin-2 (v080) [pg/mL]    | 0.548358411 | PH     | 1311.597403 | 967.6802737 | 349   | 647    | 1070  | 1580   | 6800   | 0.046290391 |
| 70 | 6Ckine (v001) [pg/mL]       | 0.543345411 | All    | 462.2929936 | 156.8931231 | 193   | 360    | 434   | 551    | 950    | NA          |
| 71 | 6Ckine (v001) [pg/mL]       | 0.543345411 | Non_PH | 421.6125    | 136.7337331 | 193   | 326.75 | 394   | 493.5  | 925    | NA          |
| 72 | 6Ckine (v001) [pg/mL]       | 0.543345411 | PH     | 504.5584416 | 165.9531872 | 212   | 384    | 476   | 601    | 950    | 0.001501795 |
| 73 | B2M (v032) [ug/mL]          | 0.490770571 | All    | 2.585987261 | 1.069594855 | 0.8   | 1.9    | 2.4   | 3      | 8.5    | NA          |
| 74 | B2M (v032) [ug/mL]          | 0.490770571 | Non_PH | 2.35        | 0.971883204 | 0.8   | 1.7    | 2.1   | 2.625  | 5.5    | NA          |
| 75 | B2M (v032) [ug/mL]          | 0.490770571 | PH     | 2.831168831 | 1.116651449 | 1.1   | 2.1    | 2.7   | 3.2    | 8.5    | 0.000625509 |
| 76 | VEGF (v300) [pg/mL]         | 0.484691445 | All    | 271.9936306 | 176.4667651 | 38    | 151    | 237   | 340    | 1270   | NA          |
| 77 | VEGF (v300) [pg/mL]         | 0.484691445 | Non_PH | 269.475     | 147.5145112 | 60    | 171.5  | 256   | 322    | 1020   | NA          |
| 78 | VEGF (v300) [pg/mL]         | 0.484691445 | PH     | 274.6103896 | 203.1917785 | 38    | 140    | 218   | 354    | 1270   | 0.442913365 |
| 79 | I-309 (v265) [pg/mL]        | 0.478202174 | All    | 2141.55414  | 12912.67191 | 48    | 48     | 128   | 332    | 147000 | NA          |
| 80 | I-309 (v265) [pg/mL]        | 0.478202174 | Non_PH | 962.0375    | 2886.44198  | 48    | 48     | 102   | 270.75 | 21200  | NA          |
| 81 | I-309 (v265) [pg/mL]        | 0.478202174 | PH     | 3367.025974 | 18182.50199 | 48    | 102    | 177   | 433    | 147000 | 0.006513465 |
| 82 | E-Cad (v038) [ng/mL]        | 0.477367358 | All    | 3900.44586  | 1608.303113 | 1020  | 2760   | 3540  | 4770   | 11300  | NA          |
| 83 | E-Cad (v038) [ng/mL]        | 0.477367358 | Non_PH | 4017        | 1867.192708 | 1690  | 2735   | 3585  | 4720   | 11300  | NA          |
| 84 | E-Cad (v038) [ng/mL]        | 0.477367358 | PH     | 3779.350649 | 1286.945934 | 1020  | 2760   | 3540  | 4770   | 8650   | 0.96778936  |
| 85 | Leptin (v178) [ng/mL]       | 0.474415644 | All    | 26.02050955 | 43.84656705 | 0.53  | 7      | 16    | 30     | 490    | NA          |
| 86 | Leptin (v178) [ng/mL]       | 0.474415644 | Non_PH | 32.11275    | 57.17702181 | 0.53  | 7.7    | 18.5  | 38     | 490    | NA          |
| 87 | Leptin (v178) [ng/mL]       | 0.474415644 | PH     | 19.69090909 | 21.64044205 | 1.3   | 6.4    | 14    | 22     | 103    | 0.0451005   |
| 88 | GH (v116) [ng/mL]           | 0.470167192 | All    | 1.027006369 | 1.878313641 | 0.05  | 0.18   | 0.43  | 1.1    | 18     | NA          |
| 89 | GH (v116) [ng/mL]           | 0.470167192 | Non_PH | 1.082625    | 1.423965531 | 0.05  | 0.13   | 0.41  | 1.2    | 6.3    | NA          |
| 90 | GH (v116) [ng/mL]           | 0.470167192 | PH     | 0.969220779 | 2.264388361 | 0.05  | 0.19   | 0.43  | 0.76   | 18     | 0.753142839 |
| 91 | cFib (v057) [ug/mL]         | 0.468118494 | All    | 4.816528662 | 2.565817437 | 0.425 | 3.2    | 4.3   | 5.8    | 13     | NA          |
| 92 | cFib (v057) [ug/mL]         | 0.468118494 | Non_PH | 4.1311875   | 2.063245146 | 0.425 | 2.875  | 4     | 5.3    | 11     | NA          |
| 93 | cFib (v057) [ug/mL]         | 0.468118494 | PH     | 5.528571429 | 2.842573757 | 1     | 3.7    | 4.6   | 7.2    | 13     | 0.00365823  |

|     |                          |             |        |             |             |       |        |       |        |      |             |
|-----|--------------------------|-------------|--------|-------------|-------------|-------|--------|-------|--------|------|-------------|
| 94  | Nr-CAM (v214) [ng/mL]    | 0.447883105 | All    | 0.92589172  | 0.660756051 | 0.115 | 0.51   | 0.73  | 1.1    | 3.5  | NA          |
| 95  | Nr-CAM (v214) [ng/mL]    | 0.447883105 | Non_PH | 0.833       | 0.618692271 | 0.115 | 0.4525 | 0.655 | 0.9475 | 2.9  | NA          |
| 96  | Nr-CAM (v214) [ng/mL]    | 0.447883105 | PH     | 1.022402597 | 0.692651565 | 0.115 | 0.53   | 0.89  | 1.2    | 3.5  | 0.009284056 |
| 97  | MMP-9 (v198) [ng/mL]     | 0.447300418 | All    | 96.29299363 | 39.71392269 | 11    | 74     | 97    | 119    | 236  | NA          |
| 98  | MMP-9 (v198) [ng/mL]     | 0.447300418 | Non_PH | 103.2625    | 40.86865152 | 11    | 77.75  | 100   | 133.25 | 236  | NA          |
| 99  | MMP-9 (v198) [ng/mL]     | 0.447300418 | PH     | 89.05194805 | 37.37607457 | 11    | 70     | 93    | 116    | 171  | 0.061459714 |
| 100 | tPA (v283) [ng/mL]       | 0.445267005 | All    | 1.484713376 | 0.690559565 | 0.51  | 1      | 1.4   | 1.8    | 4.3  | NA          |
| 101 | tPA (v283) [ng/mL]       | 0.445267005 | Non_PH | 1.45225     | 0.784296791 | 0.51  | 0.83   | 1.3   | 1.725  | 4.3  | NA          |
| 102 | tPA (v283) [ng/mL]       | 0.445267005 | PH     | 1.518441558 | 0.580671265 | 0.54  | 1.1    | 1.4   | 1.8    | 3.2  | 0.139240815 |
| 103 | GDF-15 (v115) [ng/mL]    | 0.426373622 | All    | 0.975859873 | 0.570966392 | 0.15  | 0.53   | 0.87  | 1.2    | 3    | NA          |
| 104 | GDF-15 (v115) [ng/mL]    | 0.426373622 | Non_PH | 0.920625    | 0.620200751 | 0.15  | 0.4675 | 0.73  | 1.2    | 3    | NA          |
| 105 | GDF-15 (v115) [ng/mL]    | 0.426373622 | PH     | 1.033246753 | 0.512623391 | 0.22  | 0.66   | 0.97  | 1.3    | 2.9  | 0.034132294 |
| 106 | Hemopexin (v121) [ug/mL] | 0.411748814 | All    | 1578.006369 | 278.5870599 | 849   | 1410   | 1570  | 1760   | 2410 | NA          |
| 107 | Hemopexin (v121) [ug/mL] | 0.411748814 | Non_PH | 1617.775    | 288.2458504 | 962   | 1427.5 | 1605  | 1822.5 | 2410 | NA          |
| 108 | Hemopexin (v121) [ug/mL] | 0.411748814 | PH     | 1536.688312 | 263.7166671 | 849   | 1370   | 1560  | 1690   | 2200 | 0.100632966 |
| 109 | Decorin (v072) [ng/mL]   | 0.406052252 | All    | 1.841019108 | 0.598742469 | 0.91  | 1.4    | 1.8   | 2      | 4.8  | NA          |
| 110 | Decorin (v072) [ng/mL]   | 0.406052252 | Non_PH | 1.70425     | 0.399454612 | 0.91  | 1.4    | 1.7   | 1.9    | 3    | NA          |
| 111 | Decorin (v072) [ng/mL]   | 0.406052252 | PH     | 1.983116883 | 0.727903008 | 1     | 1.4    | 1.9   | 2.3    | 4.8  | 0.026933972 |
| 112 | Omentin (v218) [ng/mL]   | 0.400778844 | All    | 144.2866242 | 64.05066614 | 34    | 101    | 136   | 174    | 434  | NA          |
| 113 | Omentin (v218) [ng/mL]   | 0.400778844 | Non_PH | 135.75      | 56.14098437 | 34    | 102    | 131   | 161.5  | 343  | NA          |
| 114 | Omentin (v218) [ng/mL]   | 0.400778844 | PH     | 153.1558442 | 70.62764945 | 45    | 98     | 138   | 188    | 434  | 0.211881425 |
| 115 | Periostin (v230) [ng/mL] | 0.398764835 | All    | 233.866242  | 129.7190799 | 55    | 154    | 196   | 282    | 879  | NA          |
| 116 | Periostin (v230) [ng/mL] | 0.398764835 | Non_PH | 227.3375    | 127.1973393 | 74    | 135.75 | 185   | 284    | 617  | NA          |
| 117 | Periostin (v230) [ng/mL] | 0.398764835 | PH     | 240.6493506 | 132.7795726 | 55    | 173    | 208   | 280    | 879  | 0.195069485 |
| 118 | C-Peptide (v036) [ng/mL] | 0.396193388 | All    | 2.739171975 | 2.502492081 | 0.36  | 1.2    | 2     | 3.1    | 14   | NA          |
| 119 | C-Peptide (v036) [ng/mL] | 0.396193388 | Non_PH | 2.457625    | 2.403803023 | 0.36  | 1.175  | 1.9   | 2.7    | 14   | NA          |
| 120 | C-Peptide (v036) [ng/mL] | 0.396193388 | PH     | 3.031688312 | 2.584191517 | 0.5   | 1.2    | 2.1   | 3.8    | 12   | 0.139199927 |
| 121 | MMP-7 (v197) [ng/mL]     | 0.392965884 | All    | 8.629299363 | 5.246430547 | 3.3   | 5.5    | 7.2   | 9.9    | 43   | NA          |
| 122 | MMP-7 (v197) [ng/mL]     | 0.392965884 | Non_PH | 8.7875      | 4.498786756 | 3.4   | 5.775  | 7.6   | 11     | 34   | NA          |
| 123 | MMP-7 (v197) [ng/mL]     | 0.392965884 | PH     | 8.464935065 | 5.950381815 | 3.3   | 5.2    | 7     | 8.9    | 43   | 0.12608972  |
| 124 | SHBG (v257) [nmol/L]     | 0.380477645 | All    | 58.68598726 | 34.60846608 | 3.35  | 33     | 49    | 74     | 213  | NA          |
| 125 | SHBG (v257) [nmol/L]     | 0.380477645 | Non_PH | 62.32125    | 37.10682302 | 3.35  | 36.75  | 53    | 79.5   | 213  | NA          |
| 126 | SHBG (v257) [nmol/L]     | 0.380477645 | PH     | 54.90909091 | 31.60537172 | 11    | 32     | 46    | 70     | 163  | 0.190232079 |

|     |                                |             |        |             |             |       |        |       |        |       |             |
|-----|--------------------------------|-------------|--------|-------------|-------------|-------|--------|-------|--------|-------|-------------|
| 127 | E-Selectin (v075) [ng/mL]      | 0.377794497 | All    | 16.51464968 | 8.618345187 | 1.2   | 10     | 15    | 21     | 49    | NA          |
| 128 | E-Selectin (v075) [ng/mL]      | 0.377794497 | Non_PH | 15.5075     | 8.361890268 | 2.5   | 9.175  | 14    | 20.25  | 49    | NA          |
| 129 | E-Selectin (v075) [ng/mL]      | 0.377794497 | PH     | 17.56103896 | 8.809237912 | 1.2   | 11     | 16    | 23     | 42    | 0.132137474 |
| 130 | PRL (v241) [ng/mL]             | 0.373953073 | All    | 12.21910828 | 18.10474203 | 2.2   | 5.7    | 7.5   | 12     | 172   | NA          |
| 131 | PRL (v241) [ng/mL]             | 0.373953073 | Non_PH | 13.675      | 16.62818638 | 2.2   | 5.875  | 8.05  | 13.25  | 106   | NA          |
| 132 | PRL (v241) [ng/mL]             | 0.373953073 | PH     | 10.70649351 | 19.51550219 | 2.5   | 5.5    | 7.1   | 10     | 172   | 0.135984188 |
| 133 | TIMP-3 (v282) [ng/mL]          | 0.371447357 | All    | 25.47802548 | 15.44944956 | 0.95  | 14     | 21    | 35     | 81    | NA          |
| 134 | TIMP-3 (v282) [ng/mL]          | 0.371447357 | Non_PH | 23.061875   | 13.98078981 | 0.95  | 12     | 18.5  | 32.25  | 70    | NA          |
| 135 | TIMP-3 (v282) [ng/mL]          | 0.371447357 | PH     | 27.98831169 | 16.55976397 | 7.2   | 15     | 24    | 38     | 81    | 0.04871358  |
| 136 | ICAM-1 (v139) [ng/mL]          | 0.368629081 | All    | 187.4203822 | 136.8667295 | 29    | 122    | 160   | 205    | 1150  | NA          |
| 137 | ICAM-1 (v139) [ng/mL]          | 0.368629081 | Non_PH | 178.0125    | 92.23037938 | 30    | 115.75 | 154.5 | 234.25 | 431   | NA          |
| 138 | ICAM-1 (v139) [ng/mL]          | 0.368629081 | PH     | 197.1948052 | 171.518914  | 29    | 130    | 162   | 198    | 1150  | 0.700595567 |
| 139 | MPIF-1 (v208) [ng/mL]          | 0.365786934 | All    | 1.964713376 | 1.178275337 | 0.48  | 1.3    | 1.6   | 2.3    | 7.4   | NA          |
| 140 | MPIF-1 (v208) [ng/mL]          | 0.365786934 | Non_PH | 1.8725      | 1.241787707 | 0.48  | 1.2    | 1.5   | 1.825  | 7.4   | NA          |
| 141 | MPIF-1 (v208) [ng/mL]          | 0.365786934 | PH     | 2.060519481 | 1.108412682 | 0.59  | 1.4    | 1.7   | 2.4    | 6.3   | 0.019596846 |
| 142 | CD163 (v056) [ng/mL]           | 0.365461524 | All    | 299.089172  | 140.8017963 | 49    | 200    | 284   | 363    | 875   | NA          |
| 143 | CD163 (v056) [ng/mL]           | 0.365461524 | Non_PH | 301.975     | 138.7232903 | 49    | 209    | 299.5 | 368    | 762   | NA          |
| 144 | CD163 (v056) [ng/mL]           | 0.365461524 | PH     | 296.0909091 | 143.7778057 | 96    | 200    | 273   | 347    | 875   | 0.54819762  |
| 145 | Visfatin (v308) [ng/mL]        | 0.364529735 | All    | 5.040286624 | 4.886409667 | 0.345 | 1.9    | 3.3   | 6.2    | 30    | NA          |
| 146 | Visfatin (v308) [ng/mL]        | 0.364529735 | Non_PH | 4.9254375   | 4.668304804 | 0.345 | 1.675  | 3.35  | 6.2    | 23    | NA          |
| 147 | Visfatin (v308) [ng/mL]        | 0.364529735 | PH     | 5.15961039  | 5.131184123 | 0.345 | 2.1    | 3.3   | 6.2    | 30    | 0.678573199 |
| 148 | PEDF (v232) [ng/mL]            | 0.362871177 | All    | 4903.43949  | 1456.993618 | 1260  | 4020   | 4780  | 5670   | 12200 | NA          |
| 149 | PEDF (v232) [ng/mL]            | 0.362871177 | Non_PH | 5051.875    | 1687.13606  | 1260  | 4020   | 4940  | 5947.5 | 12200 | NA          |
| 150 | PEDF (v232) [ng/mL]            | 0.362871177 | PH     | 4749.220779 | 1162.459695 | 1700  | 4020   | 4650  | 5320   | 8430  | 0.32637519  |
| 151 | MMP-10 (v200) [ng/mL]          | 0.362828313 | All    | 1.60133758  | 0.699953383 | 0.53  | 1.1    | 1.4   | 1.9    | 5.9   | NA          |
| 152 | MMP-10 (v200) [ng/mL]          | 0.362828313 | Non_PH | 1.642875    | 0.608447274 | 0.53  | 1.2    | 1.5   | 1.9    | 3.7   | NA          |
| 153 | MMP-10 (v200) [ng/mL]          | 0.362828313 | PH     | 1.558181818 | 0.78557677  | 0.53  | 1.1    | 1.3   | 1.9    | 5.9   | 0.113013251 |
| 154 | FABP, adipocyte (v090) [ng/mL] | 0.362622315 | All    | 27.45031847 | 14.82074354 | 2.8   | 18     | 24    | 32     | 91    | NA          |
| 155 | FABP, adipocyte (v090) [ng/mL] | 0.362622315 | Non_PH | 24.74625    | 13.10743285 | 2.8   | 16.75  | 23    | 29.25  | 91    | NA          |
| 156 | FABP, adipocyte (v090) [ng/mL] | 0.362622315 | PH     | 30.25974026 | 16.01841259 | 10    | 18     | 26    | 34     | 84    | 0.028323398 |
| 157 | PSAT (v231) [ng/mL]            | 0.357225948 | All    | 4.445859873 | 3.840614441 | 1.1   | 2.1    | 3.1   | 5.4    | 24    | NA          |
| 158 | PSAT (v231) [ng/mL]            | 0.357225948 | Non_PH | 4.0925      | 3.802456734 | 1.1   | 1.9    | 2.75  | 4.725  | 24    | NA          |
| 159 | PSAT (v231) [ng/mL]            | 0.357225948 | PH     | 4.812987013 | 3.870344424 | 1.5   | 2.4    | 3.4   | 5.8    | 20    | 0.038873894 |

|     |                                    |             |        |             |             |      |        |       |        |       |             |
|-----|------------------------------------|-------------|--------|-------------|-------------|------|--------|-------|--------|-------|-------------|
| 160 | G-CSF (v113) [pg/mL]               | 0.355006133 | All    | 10.7910828  | 6.852712132 | 3.15 | 7.3    | 9.6   | 12     | 53    | NA          |
| 161 | G-CSF (v113) [pg/mL]               | 0.355006133 | Non_PH | 11.449375   | 6.731131593 | 3.15 | 7.7    | 11    | 13.25  | 50    | NA          |
| 162 | G-CSF (v113) [pg/mL]               | 0.355006133 | PH     | 10.10714286 | 6.954436838 | 3.15 | 7      | 8.9   | 12     | 53    | 0.031559003 |
| 163 | Myoglobin (v210) [ng/mL]           | 0.352062832 | All    | 31.54012739 | 30.41217465 | 6.9  | 17     | 25    | 36     | 321   | NA          |
| 164 | Myoglobin (v210) [ng/mL]           | 0.352062832 | Non_PH | 31.5        | 37.62957697 | 6.9  | 14.75  | 22    | 34     | 321   | NA          |
| 165 | Myoglobin (v210) [ng/mL]           | 0.352062832 | PH     | 31.58181818 | 20.65422556 | 9.8  | 20     | 26    | 36     | 144   | 0.109204197 |
| 166 | MCP-1 (v203) [pg/mL]               | 0.351111747 | All    | 601.7770701 | 358.068619  | 122  | 381    | 525   | 717    | 2420  | NA          |
| 167 | MCP-1 (v203) [pg/mL]               | 0.351111747 | Non_PH | 574.875     | 334.8355869 | 122  | 324.75 | 539.5 | 691.75 | 2160  | NA          |
| 168 | MCP-1 (v203) [pg/mL]               | 0.351111747 | PH     | 629.7272727 | 380.8944334 | 210  | 385    | 516   | 743    | 2420  | 0.544700058 |
| 169 | PDGF-BB (v236) [pg/mL]             | 0.348525552 | All    | 12429.29936 | 5696.145808 | 2580 | 8490   | 11800 | 14800  | 41800 | NA          |
| 170 | PDGF-BB (v236) [pg/mL]             | 0.348525552 | Non_PH | 12832       | 6125.058388 | 3410 | 8610   | 12550 | 15050  | 41800 | NA          |
| 171 | PDGF-BB (v236) [pg/mL]             | 0.348525552 | PH     | 12010.90909 | 5220.587833 | 2580 | 8430   | 10200 | 14400  | 25200 | 0.319497624 |
| 172 | FAS (v089) [ng/mL]                 | 0.343543164 | All    | 28.42802548 | 27.03123747 | 4.2  | 16     | 23    | 33     | 281   | NA          |
| 173 | FAS (v089) [ng/mL]                 | 0.343543164 | Non_PH | 26.59875    | 21.26734285 | 4.2  | 15.75  | 20    | 32.5   | 165   | NA          |
| 174 | FAS (v089) [ng/mL]                 | 0.343543164 | PH     | 30.32857143 | 31.97650806 | 5.3  | 19     | 25    | 33     | 281   | 0.110699225 |
| 175 | LCN1 (v181) [ng/mL]                | 0.341033243 | All    | 1.614840764 | 0.961023496 | 0.23 | 1      | 1.4   | 1.9    | 7.5   | NA          |
| 176 | LCN1 (v181) [ng/mL]                | 0.341033243 | Non_PH | 1.58        | 0.748967221 | 0.52 | 1.075  | 1.45  | 2      | 4.3   | NA          |
| 177 | LCN1 (v181) [ng/mL]                | 0.341033243 | PH     | 1.651038961 | 1.14457023  | 0.23 | 1      | 1.3   | 1.9    | 7.5   | 0.457070612 |
| 178 | LTF (v174) [ng/mL]                 | 0.34058637  | All    | 62.50828025 | 37.13063211 | 8.8  | 37     | 52    | 77     | 224   | NA          |
| 179 | LTF (v174) [ng/mL]                 | 0.34058637  | Non_PH | 64.2625     | 35.52027189 | 19   | 39.75  | 54    | 74.75  | 224   | NA          |
| 180 | LTF (v174) [ng/mL]                 | 0.34058637  | PH     | 60.68571429 | 38.88228427 | 8.8  | 35     | 49    | 77     | 199   | 0.204856488 |
| 181 | PON-1 (v225) [ng/mL]               | 0.33790687  | All    | 2829.16242  | 1838.497434 | 15.5 | 1970   | 2690  | 3310   | 18500 | NA          |
| 182 | PON-1 (v225) [ng/mL]               | 0.33790687  | Non_PH | 2809.54375  | 1076.113233 | 15.5 | 2097.5 | 2800  | 3665   | 6020  | NA          |
| 183 | PON-1 (v225) [ng/mL]               | 0.33790687  | PH     | 2849.545455 | 2394.470112 | 186  | 1820   | 2560  | 3080   | 18500 | 0.105118349 |
| 184 | TM (v272) [ng/mL]                  | 0.335894763 | All    | 4.692356688 | 1.45490071  | 2.2  | 3.7    | 4.4   | 5.5    | 12    | NA          |
| 185 | TM (v272) [ng/mL]                  | 0.335894763 | Non_PH | 4.73875     | 1.619774461 | 2.2  | 3.575  | 4.4   | 5.6    | 12    | NA          |
| 186 | TM (v272) [ng/mL]                  | 0.335894763 | PH     | 4.644155844 | 1.270049057 | 2.4  | 3.8    | 4.5   | 5.5    | 9     | 0.747870327 |
| 187 | IL-2 receptor alpha (v150) [pg/mL] | 0.33416325  | All    | 3855.923567 | 1822.085645 | 1270 | 2640   | 3420  | 4460   | 12000 | NA          |
| 188 | IL-2 receptor alpha (v150) [pg/mL] | 0.33416325  | Non_PH | 3844.375    | 1919.02391  | 1440 | 2537.5 | 3240  | 4727.5 | 10300 | NA          |
| 189 | IL-2 receptor alpha (v150) [pg/mL] | 0.33416325  | PH     | 3867.922078 | 1728.126714 | 1270 | 2770   | 3430  | 4260   | 12000 | 0.571844906 |
| 190 | ANG-1 (v013) [ng/mL]               | 0.333016196 | All    | 32.21019108 | 10.86220916 | 15   | 24     | 30    | 40     | 68    | NA          |
| 191 | ANG-1 (v013) [ng/mL]               | 0.333016196 | Non_PH | 32.8        | 12.00569485 | 15   | 24     | 30.5  | 41.5   | 68    | NA          |
| 192 | ANG-1 (v013) [ng/mL]               | 0.333016196 | PH     | 31.5974026  | 9.57142092  | 16   | 25     | 30    | 37     | 55    | 0.742539649 |

|     |                           |             |        |             |             |      |        |       |        |      |             |
|-----|---------------------------|-------------|--------|-------------|-------------|------|--------|-------|--------|------|-------------|
| 193 | Apo C-III (v025) [ug/mL]  | 0.332552565 | All    | 222.1273885 | 83.48220493 | 16   | 163    | 213   | 264    | 523  | NA          |
| 194 | Apo C-III (v025) [ug/mL]  | 0.332552565 | Non_PH | 215.95      | 87.14703129 | 16   | 160.25 | 214   | 254.25 | 523  | NA          |
| 195 | Apo C-III (v025) [ug/mL]  | 0.332552565 | PH     | 228.5454545 | 79.55543341 | 95   | 166    | 213   | 284    | 427  | 0.263397125 |
| 196 | uPA (v297) [pg/mL]        | 0.330892093 | All    | 899.2738854 | 343.174483  | 221  | 654    | 880   | 1140   | 2380 | NA          |
| 197 | uPA (v297) [pg/mL]        | 0.330892093 | Non_PH | 877.9125    | 343.9987928 | 221  | 669    | 843.5 | 1012.5 | 2380 | NA          |
| 198 | uPA (v297) [pg/mL]        | 0.330892093 | PH     | 921.4675325 | 343.1474129 | 362  | 644    | 928   | 1220   | 1740 | 0.383823619 |
| 199 | TNF RI (v293) [pg/mL]     | 0.330183728 | All    | 2271.757962 | 1180.412734 | 149  | 1540   | 1970  | 2740   | 7960 | NA          |
| 200 | TNF RI (v293) [pg/mL]     | 0.330183728 | Non_PH | 2304.4      | 1305.580967 | 149  | 1572.5 | 1905  | 2635   | 7960 | NA          |
| 201 | TNF RI (v293) [pg/mL]     | 0.330183728 | PH     | 2237.844156 | 1042.099261 | 219  | 1530   | 2080  | 2850   | 5060 | 0.816730258 |
| 202 | Cystatin-B (v070) [ng/mL] | 0.32978462  | All    | 10.12866242 | 7.434224831 | 1.7  | 6.1    | 8.1   | 12     | 74   | NA          |
| 203 | Cystatin-B (v070) [ng/mL] | 0.32978462  | Non_PH | 9.6075      | 6.36099218  | 1.7  | 6      | 7.15  | 10.25  | 35   | NA          |
| 204 | Cystatin-B (v070) [ng/mL] | 0.32978462  | PH     | 10.67012987 | 8.414384065 | 2.4  | 6.5    | 9.4   | 12     | 74   | 0.062350192 |
| 205 | OPG (v221) [pM]           | 0.329515912 | All    | 7.668789809 | 2.629781445 | 3.2  | 5.6    | 7.2   | 9.4    | 15   | NA          |
| 206 | OPG (v221) [pM]           | 0.329515912 | Non_PH | 7.3975      | 2.639762887 | 3.2  | 5.675  | 6.95  | 8.65   | 15   | NA          |
| 207 | OPG (v221) [pM]           | 0.329515912 | PH     | 7.950649351 | 2.606551633 | 3.8  | 5.6    | 7.8   | 9.9    | 14   | 0.145711826 |
| 208 | Apo D (v026) [ug/mL]      | 0.328050168 | All    | 137.6050955 | 51.2973681  | 60   | 100    | 133   | 160    | 376  | NA          |
| 209 | Apo D (v026) [ug/mL]      | 0.328050168 | Non_PH | 132.4625    | 50.93802234 | 60   | 92.5   | 126.5 | 160    | 308  | NA          |
| 210 | Apo D (v026) [ug/mL]      | 0.328050168 | PH     | 142.9480519 | 51.45358054 | 65   | 111    | 138   | 160    | 376  | 0.142615505 |
| 211 | FGF-21 (v097) [ng/mL]     | 0.324300271 | All    | 0.29789172  | 0.336354982 | 0.03 | 0.14   | 0.23  | 0.35   | 3.7  | NA          |
| 212 | FGF-21 (v097) [ng/mL]     | 0.324300271 | Non_PH | 0.24915     | 0.17224233  | 0.03 | 0.13   | 0.21  | 0.33   | 0.79 | NA          |
| 213 | FGF-21 (v097) [ng/mL]     | 0.324300271 | PH     | 0.348532468 | 0.443042073 | 0.03 | 0.17   | 0.26  | 0.37   | 3.7  | 0.029031108 |
| 214 | EGF (v082) [pg/mL]        | 0.322094874 | All    | 202.3566879 | 128.4726856 | 12   | 118    | 169   | 257    | 824  | NA          |
| 215 | EGF (v082) [pg/mL]        | 0.322094874 | Non_PH | 223.8       | 147.2002339 | 12   | 121    | 202.5 | 274    | 824  | NA          |
| 216 | EGF (v082) [pg/mL]        | 0.322094874 | PH     | 180.0779221 | 101.8285151 | 23   | 116    | 157   | 238    | 646  | 0.1164977   |
| 217 | uPAR (v298) [ng/mL]       | 0.321797619 | All    | 2.955541401 | 1.396809274 | 0.51 | 2      | 2.8   | 3.5    | 9.6  | NA          |
| 218 | uPAR (v298) [ng/mL]       | 0.321797619 | Non_PH | 2.82025     | 1.432504203 | 0.51 | 1.875  | 2.5   | 3.425  | 9.6  | NA          |
| 219 | uPAR (v298) [ng/mL]       | 0.321797619 | PH     | 3.096103896 | 1.353692957 | 1.2  | 2.3    | 2.8   | 3.6    | 8.3  | 0.115071992 |
| 220 | VDBP (v309) [ug/mL]       | 0.320410707 | All    | 258.0700637 | 112.8746249 | 63   | 148    | 256   | 348    | 512  | NA          |
| 221 | VDBP (v309) [ug/mL]       | 0.320410707 | Non_PH | 239.4625    | 107.0868503 | 63   | 135    | 242   | 314.25 | 470  | NA          |
| 222 | VDBP (v309) [ug/mL]       | 0.320410707 | PH     | 277.4025974 | 116.1401444 | 71   | 188    | 272   | 361    | 512  | 0.047065556 |
| 223 | CA-15-3 (v042) [U/mL]     | 0.31747424  | All    | 6.377579618 | 4.182809355 | 0.18 | 3.4    | 5.9   | 8.1    | 28   | NA          |
| 224 | CA-15-3 (v042) [U/mL]     | 0.31747424  | Non_PH | 6.88975     | 4.879614006 | 0.18 | 3.45   | 6.15  | 8.475  | 28   | NA          |
| 225 | CA-15-3 (v042) [U/mL]     | 0.31747424  | PH     | 5.845454545 | 3.255624504 | 1.2  | 3.4    | 5.8   | 7.8    | 16   | 0.246483786 |

|     |                                          |             |        |             |             |     |        |      |        |      |             |
|-----|------------------------------------------|-------------|--------|-------------|-------------|-----|--------|------|--------|------|-------------|
| 226 | FSH (v102) [mIU/mL]                      | 0.316497824 | All    | 40.97707006 | 26.9776614  | 2.2 | 17     | 39   | 58     | 115  | NA          |
| 227 | FSH (v102) [mIU/mL]                      | 0.316497824 | Non_PH | 43.2325     | 28.44595041 | 2.2 | 23.5   | 39.5 | 60     | 115  | NA          |
| 228 | FSH (v102) [mIU/mL]                      | 0.316497824 | PH     | 38.63376623 | 25.33500081 | 3.1 | 15     | 39   | 57     | 99   | 0.486827073 |
| 229 | Hepsin (v125) [pg/mL]                    | 0.316155547 | All    | 1060.89172  | 349.8286317 | 312 | 856    | 988  | 1180   | 2540 | NA          |
| 230 | Hepsin (v125) [pg/mL]                    | 0.316155547 | Non_PH | 1014.975    | 317.1297692 | 517 | 829.75 | 920  | 1090   | 2440 | NA          |
| 231 | Hepsin (v125) [pg/mL]                    | 0.316155547 | PH     | 1108.597403 | 377.0078269 | 312 | 890    | 1020 | 1280   | 2540 | 0.054525485 |
| 232 | EPR (v084) [pg/mL]                       | 0.312963834 | All    | 49.34394904 | 26.73755722 | 7.5 | 30     | 45   | 64     | 185  | NA          |
| 233 | EPR (v084) [pg/mL]                       | 0.312963834 | Non_PH | 53.1        | 29.35179463 | 7.5 | 32     | 50.5 | 67.5   | 185  | NA          |
| 234 | EPR (v084) [pg/mL]                       | 0.312963834 | PH     | 45.44155844 | 23.27241054 | 7.5 | 29     | 42   | 56     | 123  | 0.078184927 |
| 235 | GRO-alpha (v117) [pg/mL]                 | 0.311035046 | All    | 181.7898089 | 87.21290129 | 73  | 123    | 160  | 214    | 502  | NA          |
| 236 | GRO-alpha (v117) [pg/mL]                 | 0.311035046 | Non_PH | 193.875     | 101.1079602 | 73  | 128.75 | 160  | 233.25 | 502  | NA          |
| 237 | GRO-alpha (v117) [pg/mL]                 | 0.311035046 | PH     | 169.2337662 | 68.35701483 | 77  | 113    | 158  | 206    | 396  | 0.261889552 |
| 238 | TNFR2 (v294) [ng/mL]                     | 0.310410811 | All    | 11.65286624 | 25.28050724 | 3.5 | 6.3    | 8.2  | 12     | 320  | NA          |
| 239 | TNFR2 (v294) [ng/mL]                     | 0.310410811 | Non_PH | 13.22125    | 35.13765226 | 3.5 | 6.175  | 7.55 | 10.25  | 320  | NA          |
| 240 | TNFR2 (v294) [ng/mL]                     | 0.310410811 | PH     | 10.02337662 | 4.814011789 | 4.1 | 6.9    | 8.7  | 12     | 35   | 0.058767358 |
| 241 | ACE (v016) [ng/mL]                       | 0.308095205 | All    | 81.98089172 | 39.21284316 | 25  | 58     | 74   | 97     | 291  | NA          |
| 242 | ACE (v016) [ng/mL]                       | 0.308095205 | Non_PH | 76.9125     | 33.4793319  | 25  | 55     | 72   | 88.25  | 226  | NA          |
| 243 | ACE (v016) [ng/mL]                       | 0.308095205 | PH     | 87.24675325 | 43.99974756 | 32  | 60     | 77   | 104    | 291  | 0.118943894 |
| 244 | Fib-1C (v100) [ug/mL]                    | 0.305748703 | All    | 26.77707006 | 7.39767698  | 13  | 21     | 27   | 32     | 49   | NA          |
| 245 | Fib-1C (v100) [ug/mL]                    | 0.305748703 | Non_PH | 25.4875     | 7.432385088 | 13  | 19     | 24.5 | 32     | 47   | NA          |
| 246 | Fib-1C (v100) [ug/mL]                    | 0.305748703 | PH     | 28.11688312 | 7.165292858 | 15  | 23     | 27   | 33     | 49   | 0.024446246 |
| 247 | Angiogenin (v012) [ng/mL]                | 0.304704396 | All    | 422.2929936 | 125.0951054 | 225 | 339    | 396  | 496    | 804  | NA          |
| 248 | Angiogenin (v012) [ng/mL]                | 0.304704396 | Non_PH | 405.65      | 111.6385556 | 225 | 330.75 | 380  | 453.25 | 775  | NA          |
| 249 | Angiogenin (v012) [ng/mL]                | 0.304704396 | PH     | 439.5844156 | 136.2775178 | 229 | 345    | 420  | 529    | 804  | 0.147979814 |
| 250 | Apolipoprotein(a) (Lp(a)) (v019) [ug/mL] | 0.302130435 | All    | 280.6484076 | 345.0234109 | 9.8 | 64     | 131  | 406    | 1840 | NA          |
| 251 | Apolipoprotein(a) (Lp(a)) (v019) [ug/mL] | 0.302130435 | Non_PH | 292.275     | 333.7790133 | 12  | 64     | 121  | 435.75 | 1340 | NA          |
| 252 | Apolipoprotein(a) (Lp(a)) (v019) [ug/mL] | 0.302130435 | PH     | 268.5688312 | 358.1220081 | 9.8 | 69     | 133  | 307    | 1840 | 0.937027331 |
| 253 | GPBB (v112) [ng/mL]                      | 0.299302711 | All    | 44.98726115 | 12.87513369 | 10  | 37     | 42   | 52     | 91   | NA          |
| 254 | GPBB (v112) [ng/mL]                      | 0.299302711 | Non_PH | 43.4        | 12.80980637 | 10  | 36.75  | 42   | 50     | 87   | NA          |
| 255 | GPBB (v112) [ng/mL]                      | 0.299302711 | PH     | 46.63636364 | 12.81745222 | 10  | 37     | 47   | 54     | 91   | 0.074181803 |
| 256 | Sortilin (v258) [ng/mL]                  | 0.299061506 | All    | 8.382802548 | 2.609577487 | 3.6 | 6.6    | 8.1  | 9.4    | 17   | NA          |
| 257 | Sortilin (v258) [ng/mL]                  | 0.299061506 | Non_PH | 8.38375     | 3.00482497  | 3.6 | 6      | 8    | 9.55   | 17   | NA          |
| 258 | Sortilin (v258) [ng/mL]                  | 0.299061506 | PH     | 8.381818182 | 2.143087251 | 3.8 | 6.9    | 8.2  | 9.3    | 16   | 0.500023244 |



|     |                          |             |        |             |             |       |        |       |        |      |             |
|-----|--------------------------|-------------|--------|-------------|-------------|-------|--------|-------|--------|------|-------------|
| 259 | AT-III (v018) [ug/mL]    | 0.296380958 | All    | 238.5095541 | 43.46891283 | 162   | 206    | 234   | 260    | 396  | NA          |
| 260 | AT-III (v018) [ug/mL]    | 0.296380958 | Non_PH | 241.55      | 41.53933625 | 162   | 210.75 | 237.5 | 264    | 396  | NA          |
| 261 | AT-III (v018) [ug/mL]    | 0.296380958 | PH     | 235.3506494 | 45.44307203 | 167   | 201    | 225   | 255    | 382  | 0.162224572 |
| 262 | YKL-40 (v313) [ng/mL]    | 0.295352038 | All    | 56.76878981 | 67.52817537 | 8.7   | 24     | 35    | 56     | 471  | NA          |
| 263 | YKL-40 (v313) [ng/mL]    | 0.295352038 | Non_PH | 55.45875    | 69.10823046 | 8.7   | 22     | 30.5  | 51.25  | 383  | NA          |
| 264 | YKL-40 (v313) [ng/mL]    | 0.295352038 | PH     | 58.12987013 | 66.27183863 | 10    | 27     | 38    | 56     | 471  | 0.073523567 |
| 265 | CA-19-9 (v043) [U/mL]    | 0.291884526 | All    | 20.96878981 | 34.34685977 | 0.9   | 3.9    | 8.3   | 21     | 225  | NA          |
| 266 | CA-19-9 (v043) [U/mL]    | 0.291884526 | Non_PH | 25.83375    | 43.05460455 | 0.9   | 3.3    | 9.8   | 28.5   | 225  | NA          |
| 267 | CA-19-9 (v043) [U/mL]    | 0.291884526 | PH     | 15.91428571 | 21.06737759 | 0.9   | 4.1    | 7.6   | 15     | 114  | 0.679708087 |
| 268 | IgM (v130) [mg/mL]       | 0.291732821 | All    | 2.678980892 | 1.901907674 | 0.48  | 1.5    | 2.3   | 3.1    | 15   | NA          |
| 269 | IgM (v130) [mg/mL]       | 0.291732821 | Non_PH | 2.447       | 1.351657585 | 0.54  | 1.475  | 2.25  | 2.9    | 8.3  | NA          |
| 270 | IgM (v130) [mg/mL]       | 0.291732821 | PH     | 2.92        | 2.326002896 | 0.48  | 1.5    | 2.4   | 3.5    | 15   | 0.450084241 |
| 271 | CFHR1 (v066) [ug/mL]     | 0.290008738 | All    | 2569.968153 | 981.5742877 | 529   | 1840   | 2590  | 3210   | 5220 | NA          |
| 272 | CFHR1 (v066) [ug/mL]     | 0.290008738 | Non_PH | 2668.4875   | 1024.98489  | 587   | 1877.5 | 2790  | 3317.5 | 5220 | NA          |
| 273 | CFHR1 (v066) [ug/mL]     | 0.290008738 | PH     | 2467.61039  | 929.9405068 | 529   | 1800   | 2390  | 3170   | 4500 | 0.238063487 |
| 274 | BLC (v031) [pg/mL]       | 0.289813475 | All    | 96.57324841 | 130.5658398 | 23    | 23     | 67    | 107    | 1270 | NA          |
| 275 | BLC (v031) [pg/mL]       | 0.289813475 | Non_PH | 95.775      | 160.9895802 | 23    | 23     | 58    | 94     | 1270 | NA          |
| 276 | BLC (v031) [pg/mL]       | 0.289813475 | PH     | 97.4025974  | 89.72197697 | 23    | 23     | 80    | 114    | 459  | 0.033603708 |
| 277 | CD40-L (v055) [ng/mL]    | 0.287983941 | All    | 1.747095541 | 1.108107597 | 0.009 | 0.93   | 1.6   | 2.4    | 6.1  | NA          |
| 278 | CD40-L (v055) [ng/mL]    | 0.287983941 | Non_PH | 1.8564375   | 1.271983449 | 0.02  | 0.9025 | 1.6   | 2.5    | 6.1  | NA          |
| 279 | CD40-L (v055) [ng/mL]    | 0.287983941 | PH     | 1.633493506 | 0.901644705 | 0.009 | 0.99   | 1.6   | 2.1    | 4.6  | 0.504485467 |
| 280 | AGP-1 (v005) [ug/mL]     | 0.287875493 | All    | 680.5095541 | 254.7676825 | 229   | 506    | 632   | 791    | 1760 | NA          |
| 281 | AGP-1 (v005) [ug/mL]     | 0.287875493 | Non_PH | 703.025     | 298.5507601 | 229   | 503.5  | 622   | 813.25 | 1760 | NA          |
| 282 | AGP-1 (v005) [ug/mL]     | 0.287875493 | PH     | 657.1168831 | 198.7216364 | 295   | 516    | 632   | 742    | 1270 | 0.673487691 |
| 283 | NGAL (v217) [ng/mL]      | 0.286349187 | All    | 366.2165605 | 186.9649398 | 64    | 242    | 325   | 460    | 1070 | NA          |
| 284 | NGAL (v217) [ng/mL]      | 0.286349187 | Non_PH | 350.975     | 170.7374159 | 64    | 236.5  | 325   | 439.5  | 1070 | NA          |
| 285 | NGAL (v217) [ng/mL]      | 0.286349187 | PH     | 382.0519481 | 202.3635275 | 64    | 249    | 325   | 489    | 1070 | 0.509159799 |
| 286 | PSP94 (v033) [ng/mL]     | 0.285557001 | All    | 19.02624204 | 44.12782601 | 0.42  | 6.1    | 11    | 20     | 516  | NA          |
| 287 | PSP94 (v033) [ng/mL]     | 0.285557001 | Non_PH | 22.32275    | 60.15877269 | 0.84  | 5.95   | 11    | 19.25  | 516  | NA          |
| 288 | PSP94 (v033) [ng/mL]     | 0.285557001 | PH     | 15.6012987  | 14.55190459 | 0.42  | 6.4    | 12    | 21     | 91   | 0.619200125 |
| 289 | Eotaxin-1 (v079) [pg/mL] | 0.285341905 | All    | 208.6687898 | 119.8888582 | 31    | 114    | 179   | 287    | 576  | NA          |
| 290 | Eotaxin-1 (v079) [pg/mL] | 0.285341905 | Non_PH | 216.4375    | 127.9846553 | 31    | 114    | 195.5 | 303.75 | 576  | NA          |
| 291 | Eotaxin-1 (v079) [pg/mL] | 0.285341905 | PH     | 200.5974026 | 111.1169677 | 31    | 115    | 169   | 255    | 557  | 0.468273122 |

|     |                            |             |        |             |             |         |       |       |        |      |             |
|-----|----------------------------|-------------|--------|-------------|-------------|---------|-------|-------|--------|------|-------------|
| 292 | ErbB3 (v249) [ng/mL]       | 0.284657876 | All    | 0.330464968 | 0.442225295 | 0.016   | 0.14  | 0.18  | 0.29   | 2.5  | NA          |
| 293 | ErbB3 (v249) [ng/mL]       | 0.284657876 | Non_PH | 0.3494625   | 0.508618679 | 0.016   | 0.14  | 0.18  | 0.27   | 2.5  | NA          |
| 294 | ErbB3 (v249) [ng/mL]       | 0.284657876 | PH     | 0.310727273 | 0.362960185 | 0.098   | 0.14  | 0.18  | 0.31   | 2.4  | 0.848040165 |
| 295 | Fetuin-A (v094) [ug/mL]    | 0.28421789  | All    | 598.9235669 | 182.5206185 | 199     | 494   | 573   | 677    | 1670 | NA          |
| 296 | Fetuin-A (v094) [ug/mL]    | 0.28421789  | Non_PH | 589.5875    | 157.49018   | 199     | 497   | 583   | 657.25 | 1110 | NA          |
| 297 | Fetuin-A (v094) [ug/mL]    | 0.28421789  | PH     | 608.6233766 | 205.9407835 | 247     | 489   | 561   | 678    | 1670 | 0.751981376 |
| 298 | VEGFR-2 (v305) [ng/mL]     | 0.28391363  | All    | 6.742675159 | 1.455634667 | 3.4     | 5.8   | 6.5   | 7.5    | 11   | NA          |
| 299 | VEGFR-2 (v305) [ng/mL]     | 0.28391363  | Non_PH | 6.91        | 1.458245868 | 4.1     | 5.775 | 6.6   | 7.625  | 11   | NA          |
| 300 | VEGFR-2 (v305) [ng/mL]     | 0.28391363  | PH     | 6.568831169 | 1.441787974 | 3.4     | 5.9   | 6.5   | 7.3    | 11   | 0.300879235 |
| 301 | Haptoglobin (v118) [mg/mL] | 0.283258091 | All    | 1.992878662 | 1.568208301 | 0.00265 | 0.98  | 1.8   | 2.5    | 11   | NA          |
| 302 | Haptoglobin (v118) [mg/mL] | 0.283258091 | Non_PH | 2.087658125 | 1.570914397 | 0.00265 | 1     | 1.95  | 2.7    | 11   | NA          |
| 303 | Haptoglobin (v118) [mg/mL] | 0.283258091 | PH     | 1.894406494 | 1.569562296 | 0.00265 | 0.94  | 1.8   | 2.3    | 9.2  | 0.227529398 |
| 304 | PAI-1 (v234) [ng/mL]       | 0.283015215 | All    | 180.5414013 | 58.33683035 | 57      | 141   | 170   | 211    | 411  | NA          |
| 305 | PAI-1 (v234) [ng/mL]       | 0.283015215 | Non_PH | 178.2       | 58.74863855 | 57      | 135.5 | 166.5 | 202.25 | 350  | NA          |
| 306 | PAI-1 (v234) [ng/mL]       | 0.283015215 | PH     | 182.974026  | 58.19001859 | 97      | 144   | 174   | 223    | 411  | 0.548192347 |
| 307 | TSH (v278) [uIU/mL]        | 0.282907628 | All    | 2.283130573 | 1.938461612 | 0.0125  | 1     | 1.8   | 3.2    | 13   | NA          |
| 308 | TSH (v278) [uIU/mL]        | 0.282907628 | Non_PH | 2.33809375  | 2.169761394 | 0.0125  | 1.1   | 1.75  | 3.2    | 13   | NA          |
| 309 | TSH (v278) [uIU/mL]        | 0.282907628 | PH     | 2.226025974 | 1.677155916 | 0.0125  | 0.98  | 1.8   | 3.3    | 6.1  | 0.984588217 |
| 310 | ENA-78 (v086) [ng/mL]      | 0.279524894 | All    | 3.000063694 | 2.415990134 | 0.48    | 1.5   | 2.1   | 3.7    | 14   | NA          |
| 311 | ENA-78 (v086) [ng/mL]      | 0.279524894 | Non_PH | 3.330125    | 2.77245835  | 0.64    | 1.6   | 2.3   | 4.325  | 14   | NA          |
| 312 | ENA-78 (v086) [ng/mL]      | 0.279524894 | PH     | 2.657142857 | 1.938419634 | 0.48    | 1.4   | 1.9   | 3.5    | 11   | 0.123462175 |
| 313 | Endoglin (v077) [ng/mL]    | 0.278277331 | All    | 3.805095541 | 1.099230277 | 1.1     | 3.1   | 3.7   | 4.5    | 7    | NA          |
| 314 | Endoglin (v077) [ng/mL]    | 0.278277331 | Non_PH | 3.70875     | 1.126009392 | 1.2     | 3     | 3.6   | 4.225  | 7    | NA          |
| 315 | Endoglin (v077) [ng/mL]    | 0.278277331 | PH     | 3.905194805 | 1.068803574 | 1.1     | 3.3   | 3.7   | 4.6    | 6.4  | 0.187645076 |
| 316 | RANTES (v264) [ng/mL]      | 0.27770912  | All    | 21.34840764 | 12.36010749 | 3.6     | 12    | 19    | 28     | 79   | NA          |
| 317 | RANTES (v264) [ng/mL]      | 0.27770912  | Non_PH | 22.82       | 14.63039493 | 3.6     | 12    | 19    | 29.25  | 79   | NA          |
| 318 | RANTES (v264) [ng/mL]      | 0.27770912  | PH     | 19.81948052 | 9.297283686 | 4.4     | 13    | 19    | 25     | 45   | 0.482329471 |
| 319 | FRTN (v093) [ng/mL]        | 0.276454073 | All    | 124.6872611 | 166.5051761 | 6.8     | 35    | 73    | 144    | 1270 | NA          |
| 320 | FRTN (v093) [ng/mL]        | 0.276454073 | Non_PH | 107.33625   | 122.2711391 | 6.8     | 34.25 | 70    | 136.5  | 684  | NA          |
| 321 | FRTN (v093) [ng/mL]        | 0.276454073 | PH     | 142.7142857 | 201.7934077 | 7.6     | 35    | 73    | 166    | 1270 | 0.468364196 |
| 322 | TN-C (v267) [ng/mL]        | 0.275485934 | All    | 684.0764331 | 386.9272863 | 108     | 418   | 618   | 857    | 2590 | NA          |
| 323 | TN-C (v267) [ng/mL]        | 0.275485934 | Non_PH | 669.825     | 412.070099  | 108     | 383   | 572.5 | 807.25 | 2590 | NA          |
| 324 | TN-C (v267) [ng/mL]        | 0.275485934 | PH     | 698.8831169 | 361.0604984 | 210     | 460   | 636   | 899    | 1950 | 0.36869705  |

|     |                            |             |        |             |             |       |        |       |        |       |             |
|-----|----------------------------|-------------|--------|-------------|-------------|-------|--------|-------|--------|-------|-------------|
| 325 | DPPIV (v074) [ng/mL]       | 0.274311426 | All    | 201.611465  | 82.49239667 | 42    | 153    | 184   | 227    | 751   | NA          |
| 326 | DPPIV (v074) [ng/mL]       | 0.274311426 | Non_PH | 197.3125    | 62.30663125 | 99    | 148    | 187   | 241.25 | 369   | NA          |
| 327 | DPPIV (v074) [ng/mL]       | 0.274311426 | PH     | 206.0779221 | 99.46419168 | 42    | 159    | 182   | 220    | 751   | 0.938417334 |
| 328 | CLU (v062) [ug/mL]         | 0.272466501 | All    | 192.7324841 | 43.28577995 | 112   | 165    | 185   | 213    | 346   | NA          |
| 329 | CLU (v062) [ug/mL]         | 0.272466501 | Non_PH | 196.5375    | 46.83040875 | 118   | 167    | 186   | 216    | 346   | NA          |
| 330 | CLU (v062) [ug/mL]         | 0.272466501 | PH     | 188.7792208 | 39.1816362  | 112   | 165    | 185   | 209    | 310   | 0.31342686  |
| 331 | TARC (v275) [ng/mL]        | 0.272403837 | All    | 0.678987261 | 0.480685808 | 0.051 | 0.37   | 0.59  | 0.87   | 3.7   | NA          |
| 332 | TARC (v275) [ng/mL]        | 0.272403837 | Non_PH | 0.713625    | 0.476366107 | 0.11  | 0.37   | 0.61  | 0.9225 | 2.2   | NA          |
| 333 | TARC (v275) [ng/mL]        | 0.272403837 | PH     | 0.643       | 0.485614478 | 0.051 | 0.35   | 0.56  | 0.8    | 3.7   | 0.34122795  |
| 334 | RBP-4 (v251) [ug/mL]       | 0.272089512 | All    | 31.55414013 | 13.70728559 | 13    | 24     | 30    | 36     | 142   | NA          |
| 335 | RBP-4 (v251) [ug/mL]       | 0.272089512 | Non_PH | 31.675      | 16.718651   | 13    | 22     | 28.5  | 36.25  | 142   | NA          |
| 336 | RBP-4 (v251) [ug/mL]       | 0.272089512 | PH     | 31.42857143 | 9.75142172  | 13    | 24     | 31    | 36     | 69    | 0.330357771 |
| 337 | hCG (v126) [mIU/mL]        | 0.27033184  | All    | 2.047770701 | 3.940101782 | 0.65  | 0.65   | 0.65  | 2.5    | 47    | NA          |
| 338 | hCG (v126) [mIU/mL]        | 0.27033184  | Non_PH | 2.4225      | 5.261021583 | 0.65  | 0.65   | 1.6   | 2.525  | 47    | NA          |
| 339 | hCG (v126) [mIU/mL]        | 0.27033184  | PH     | 1.658441558 | 1.671400346 | 0.65  | 0.65   | 0.65  | 2      | 8.4   | 0.089281496 |
| 340 | MPO (v209) [ng/mL]         | 0.269041242 | All    | 2040.512739 | 1469.650456 | 57.5  | 1030   | 1730  | 2720   | 11000 | NA          |
| 341 | MPO (v209) [ng/mL]         | 0.269041242 | Non_PH | 2071.13125  | 1567.912847 | 57.5  | 1047.5 | 1785  | 2602.5 | 11000 | NA          |
| 342 | MPO (v209) [ng/mL]         | 0.269041242 | PH     | 2008.701299 | 1369.678593 | 291   | 989    | 1620  | 2720   | 5950  | 0.773397586 |
| 343 | Vitronectin (v311) [ug/mL] | 0.268966646 | All    | 2421.56051  | 637.4098361 | 400   | 2040   | 2360  | 2830   | 4410  | NA          |
| 344 | Vitronectin (v311) [ug/mL] | 0.268966646 | Non_PH | 2480.5      | 677.2728261 | 400   | 2075   | 2395  | 2930   | 4410  | NA          |
| 345 | Vitronectin (v311) [ug/mL] | 0.268966646 | PH     | 2360.324675 | 591.3590156 | 705   | 1980   | 2300  | 2720   | 3850  | 0.189060695 |
| 346 | IL-18bp (v167) [ng/mL]     | 0.268402842 | All    | 16.37324841 | 9.095331165 | 5.2   | 11     | 15    | 19     | 69    | NA          |
| 347 | IL-18bp (v167) [ng/mL]     | 0.268402842 | Non_PH | 16.32       | 9.993547285 | 5.4   | 10.75  | 14    | 18     | 69    | NA          |
| 348 | IL-18bp (v167) [ng/mL]     | 0.268402842 | PH     | 16.42857143 | 8.123096654 | 5.2   | 11     | 15    | 20     | 55    | 0.332768053 |
| 349 | AFP (v010) [ng/mL]         | 0.265777565 | All    | 1.232292994 | 1.255862342 | 0.205 | 0.51   | 0.97  | 1.6    | 12    | NA          |
| 350 | AFP (v010) [ng/mL]         | 0.265777565 | Non_PH | 1.2579375   | 1.564408469 | 0.205 | 0.4425 | 0.895 | 1.525  | 12    | NA          |
| 351 | AFP (v010) [ng/mL]         | 0.265777565 | PH     | 1.205649351 | 0.831864326 | 0.205 | 0.61   | 1.1   | 1.6    | 5.2   | 0.184122497 |
| 352 | TATI (v224) [ng/mL]        | 0.26469091  | All    | 26.22611465 | 47.53985527 | 5.5   | 11     | 16    | 23     | 410   | NA          |
| 353 | TATI (v224) [ng/mL]        | 0.26469091  | Non_PH | 26.055      | 48.06743918 | 5.5   | 9.7    | 15    | 21     | 410   | NA          |
| 354 | TATI (v224) [ng/mL]        | 0.26469091  | PH     | 26.4038961  | 47.2998983  | 6.2   | 12     | 17    | 25     | 410   | 0.132506598 |
| 355 | DKK-1 (v073) [ng/mL]       | 0.261307193 | All    | 0.796369427 | 0.457428925 | 0.095 | 0.49   | 0.76  | 1      | 3.1   | NA          |
| 356 | DKK-1 (v073) [ng/mL]       | 0.261307193 | Non_PH | 0.844375    | 0.471715409 | 0.095 | 0.4875 | 0.82  | 1.1    | 2.5   | NA          |
| 357 | DKK-1 (v073) [ng/mL]       | 0.261307193 | PH     | 0.746493506 | 0.439602141 | 0.095 | 0.49   | 0.72  | 0.92   | 3.1   | 0.189501997 |

|     |                           |             |        |             |             |       |        |       |        |         |             |
|-----|---------------------------|-------------|--------|-------------|-------------|-------|--------|-------|--------|---------|-------------|
| 358 | CgA (v060) [ng/mL]        | 0.260340818 | All    | 2460.353896 | 3587.762103 | 8.5   | 592.75 | 1290  | 2720   | 29300   | NA          |
| 359 | CgA (v060) [ng/mL]        | 0.260340818 | Non_PH | 2490.525641 | 4168.10915  | 8.5   | 519.5  | 1310  | 2560   | 29300   | NA          |
| 360 | CgA (v060) [ng/mL]        | 0.260340818 | PH     | 2429.388158 | 2901.830358 | 8.5   | 625.25 | 1280  | 2885   | 14000   | 0.605302082 |
| 361 | PLGF (v233) [pg/mL]       | 0.260100016 | All    | 54.42038217 | 17.78833073 | 8     | 40     | 53    | 66     | 101     | NA          |
| 362 | PLGF (v233) [pg/mL]       | 0.260100016 | Non_PH | 52.8125     | 17.86878599 | 8     | 40     | 53    | 61     | 101     | NA          |
| 363 | PLGF (v233) [pg/mL]       | 0.260100016 | PH     | 56.09090909 | 17.66514694 | 8     | 46     | 54    | 66     | 95      | 0.350197089 |
| 364 | Apo B (v023) [ug/mL]      | 0.259913915 | All    | 1115.433121 | 384.5002963 | 424   | 806    | 1060  | 1340   | 2510    | NA          |
| 365 | Apo B (v023) [ug/mL]      | 0.259913915 | Non_PH | 1095.5      | 360.83409   | 424   | 831.75 | 1040  | 1317.5 | 1970    | NA          |
| 366 | Apo B (v023) [ug/mL]      | 0.259913915 | PH     | 1136.142857 | 408.9847093 | 507   | 799    | 1090  | 1380   | 2510    | 0.696701648 |
| 367 | SDF-1 (v262) [pg/mL]      | 0.259874715 | All    | 2898.356688 | 471.3734707 | 832   | 2650   | 2870  | 3180   | 4340    | NA          |
| 368 | SDF-1 (v262) [pg/mL]      | 0.259874715 | Non_PH | 2897.75     | 483.2667712 | 1010  | 2680   | 2900  | 3202.5 | 4340    | NA          |
| 369 | SDF-1 (v262) [pg/mL]      | 0.259874715 | PH     | 2898.987013 | 461.8590151 | 832   | 2620   | 2860  | 3160   | 3990    | 0.699289822 |
| 370 | IGFBP-1 (v132) [ng/mL]    | 0.258893503 | All    | 21.12812102 | 33.77689568 | 0.335 | 2.7    | 9.5   | 25     | 272     | NA          |
| 371 | IGFBP-1 (v132) [ng/mL]    | 0.258893503 | Non_PH | 15.4848125  | 18.31794184 | 0.335 | 1.95   | 9.05  | 19.75  | 75      | NA          |
| 372 | IGFBP-1 (v132) [ng/mL]    | 0.258893503 | PH     | 26.9912987  | 43.87093657 | 0.335 | 3.8    | 9.7   | 34     | 272     | 0.154784063 |
| 373 | IP-10 (v142) [pg/mL]      | 0.258419712 | All    | 576.910828  | 966.2116704 | 175   | 286    | 391   | 579    | 11500   | NA          |
| 374 | IP-10 (v142) [pg/mL]      | 0.258419712 | Non_PH | 498.0125    | 462.0234663 | 175   | 284.75 | 349   | 547.25 | 3530    | NA          |
| 375 | IP-10 (v142) [pg/mL]      | 0.258419712 | PH     | 658.8831169 | 1296.538691 | 178   | 286    | 423   | 618    | 11500   | 0.248706388 |
| 376 | Factor VII (v087) [ng/mL] | 0.258127975 | All    | 343.4585987 | 116.5656792 | 34    | 269    | 336   | 414    | 670     | NA          |
| 377 | Factor VII (v087) [ng/mL] | 0.258127975 | Non_PH | 346.375     | 118.3230265 | 110   | 269    | 334   | 408    | 670     | NA          |
| 378 | Factor VII (v087) [ng/mL] | 0.258127975 | PH     | 340.4285714 | 115.4080209 | 34    | 263    | 337   | 428    | 583     | 0.893848049 |
| 379 | CEA (v046) [ng/mL]        | 0.25811403  | All    | 1.77656051  | 1.34014576  | 0.23  | 0.88   | 1.4   | 2.1    | 6.7     | NA          |
| 380 | CEA (v046) [ng/mL]        | 0.25811403  | Non_PH | 1.78025     | 1.144563346 | 0.27  | 0.95   | 1.5   | 2.2    | 5.7     | NA          |
| 381 | CEA (v046) [ng/mL]        | 0.25811403  | PH     | 1.772727273 | 1.524710185 | 0.23  | 0.88   | 1.4   | 2      | 6.7     | 0.254888804 |
| 382 | IL-22 (v168) [ng/mL]      | 0.25659475  | All    | 0.20666879  | 0.062123057 | 0.077 | 0.16   | 0.2   | 0.24   | 0.47    | NA          |
| 383 | IL-22 (v168) [ng/mL]      | 0.25659475  | Non_PH | 0.2123375   | 0.059369247 | 0.077 | 0.17   | 0.2   | 0.24   | 0.42    | NA          |
| 384 | IL-22 (v168) [ng/mL]      | 0.25659475  | PH     | 0.200779221 | 0.064721391 | 0.1   | 0.16   | 0.19  | 0.24   | 0.47    | 0.165157777 |
| 385 | TRAIL-R3 (v284) [ng/mL]   | 0.256530013 | All    | 22.94840764 | 11.34384282 | 3.6   | 15     | 21    | 29     | 84      | NA          |
| 386 | TRAIL-R3 (v284) [ng/mL]   | 0.256530013 | Non_PH | 22.6825     | 13.13110883 | 5.9   | 14     | 19    | 27     | 84      | NA          |
| 387 | TRAIL-R3 (v284) [ng/mL]   | 0.256530013 | PH     | 23.22467532 | 9.206207229 | 3.6   | 16     | 23    | 30     | 53      | 0.19114363  |
| 388 | SAA (v255) [ng/mL]        | 0.255628123 | All    | 69448.19745 | 206107.7081 | 831   | 5310   | 10800 | 30100  | 1131200 | NA          |
| 389 | SAA (v255) [ng/mL]        | 0.255628123 | Non_PH | 79582.4625  | 245943.3593 | 831   | 5537.5 | 11250 | 30125  | 1131200 | NA          |
| 390 | SAA (v255) [ng/mL]        | 0.255628123 | PH     | 58919.09091 | 155242.808  | 1010  | 5310   | 8490  | 25100  | 1131200 | 0.923072538 |

|     |                             |             |        |             |             |       |        |       |        |      |             |
|-----|-----------------------------|-------------|--------|-------------|-------------|-------|--------|-------|--------|------|-------------|
| 391 | TN-X (v268) [ng/mL]         | 0.25052065  | All    | 112.4547771 | 65.38230221 | 1.4   | 66     | 101   | 153    | 305  | NA          |
| 392 | TN-X (v268) [ng/mL]         | 0.25052065  | Non_PH | 113.53      | 69.75328022 | 1.4   | 67.5   | 101.5 | 156.25 | 305  | NA          |
| 393 | TN-X (v268) [ng/mL]         | 0.25052065  | PH     | 111.3376623 | 60.94769336 | 28    | 66     | 101   | 135    | 292  | 0.91331291  |
| 394 | MDC (v185) [pg/mL]          | 0.24943894  | All    | 592.3566879 | 252.6937189 | 64    | 441    | 553   | 690    | 1830 | NA          |
| 395 | MDC (v185) [pg/mL]          | 0.24943894  | Non_PH | 594.1875    | 252.7493928 | 133   | 434    | 568.5 | 699.75 | 1260 | NA          |
| 396 | MDC (v185) [pg/mL]          | 0.24943894  | PH     | 590.4545455 | 254.2790917 | 64    | 448    | 545   | 669    | 1830 | 0.850986534 |
| 397 | Tweak (v291) [ng/mL]        | 0.247610249 | All    | 0.448407643 | 0.136586169 | 0.11  | 0.35   | 0.44  | 0.53   | 0.81 | NA          |
| 398 | Tweak (v291) [ng/mL]        | 0.247610249 | Non_PH | 0.457375    | 0.14374506  | 0.11  | 0.3475 | 0.445 | 0.5525 | 0.81 | NA          |
| 399 | Tweak (v291) [ng/mL]        | 0.247610249 | PH     | 0.439090909 | 0.129006138 | 0.13  | 0.37   | 0.43  | 0.51   | 0.75 | 0.493331167 |
| 400 | CTSB (v050) [ng/mL]         | 0.247597104 | All    | 54.74522293 | 32.83054872 | 18    | 37     | 46    | 63     | 272  | NA          |
| 401 | CTSB (v050) [ng/mL]         | 0.247597104 | Non_PH | 49.6875     | 23.120813   | 21    | 36     | 44    | 59.25  | 170  | NA          |
| 402 | CTSB (v050) [ng/mL]         | 0.247597104 | PH     | 60          | 40.02301969 | 18    | 38     | 50    | 66     | 272  | 0.091809999 |
| 403 | MMP-3 (v196) [ng/mL]        | 0.247493172 | All    | 14.85414013 | 16.06386888 | 2.5   | 5.6    | 8.8   | 17     | 94   | NA          |
| 404 | MMP-3 (v196) [ng/mL]        | 0.247493172 | Non_PH | 15.87375    | 18.35823372 | 2.5   | 5.775  | 8.75  | 16     | 94   | NA          |
| 405 | MMP-3 (v196) [ng/mL]        | 0.247493172 | PH     | 13.79480519 | 13.3085538  | 3     | 5.5    | 9     | 17     | 81   | 0.896588147 |
| 406 | IL-1RII (v148) [ng/mL]      | 0.246811489 | All    | 8.18410828  | 2.75886726  | 0.205 | 6.6    | 7.7   | 9.1    | 20   | NA          |
| 407 | IL-1RII (v148) [ng/mL]      | 0.246811489 | Non_PH | 8.2688125   | 2.930052084 | 0.205 | 6.6    | 7.85  | 9.3    | 20   | NA          |
| 408 | IL-1RII (v148) [ng/mL]      | 0.246811489 | PH     | 8.096103896 | 2.585304704 | 3.8   | 6.6    | 7.5   | 9      | 18   | 0.507932873 |
| 409 | MIP-1 alpha (v186) [pg/mL]  | 0.245904735 | All    | 36.28025478 | 79.16643733 | 15.5  | 15.5   | 15.5  | 40     | 993  | NA          |
| 410 | MIP-1 alpha (v186) [pg/mL]  | 0.245904735 | Non_PH | 39.45       | 109.4829794 | 15.5  | 15.5   | 15.5  | 38     | 993  | NA          |
| 411 | MIP-1 alpha (v186) [pg/mL]  | 0.245904735 | PH     | 32.98701299 | 19.57727167 | 15.5  | 15.5   | 35    | 42     | 120  | 0.040968819 |
| 412 | AXL (v029) [ng/mL]          | 0.245104204 | All    | 11.08853503 | 5.252618006 | 2     | 7.8    | 9.8   | 13     | 35   | NA          |
| 413 | AXL (v029) [ng/mL]          | 0.245104204 | Non_PH | 10.9525     | 4.952150153 | 2     | 7.775  | 9.45  | 13     | 31   | NA          |
| 414 | AXL (v029) [ng/mL]          | 0.245104204 | PH     | 11.22987013 | 5.576786118 | 2.9   | 7.8    | 10    | 13     | 35   | 0.746343695 |
| 415 | Galectin-3 (v103) [ng/mL]   | 0.244840985 | All    | 14.23630573 | 3.456676054 | 7.4   | 12     | 14    | 17     | 23   | NA          |
| 416 | Galectin-3 (v103) [ng/mL]   | 0.244840985 | Non_PH | 14.06       | 3.710593797 | 7.4   | 12     | 14    | 16     | 23   | NA          |
| 417 | Galectin-3 (v103) [ng/mL]   | 0.244840985 | PH     | 14.41948052 | 3.185495044 | 8.5   | 12     | 14    | 17     | 22   | 0.376947678 |
| 418 | HGF receptor (v124) [ng/mL] | 0.24424773  | All    | 75.38853503 | 24.3235798  | 32    | 58     | 71    | 90     | 178  | NA          |
| 419 | HGF receptor (v124) [ng/mL] | 0.24424773  | Non_PH | 73.8375     | 21.52563603 | 32    | 56.75  | 69.5  | 89.25  | 135  | NA          |
| 420 | HGF receptor (v124) [ng/mL] | 0.24424773  | PH     | 77          | 26.97415917 | 33    | 60     | 72    | 90     | 178  | 0.608135056 |
| 421 | SCFR (v193) [ng/mL]         | 0.243640555 | All    | 8.36433121  | 1.980482094 | 3.2   | 7      | 8.2   | 9.6    | 14   | NA          |
| 422 | SCFR (v193) [ng/mL]         | 0.243640555 | Non_PH | 8.13125     | 1.861372418 | 4.3   | 6.6    | 8     | 9.3    | 13   | NA          |
| 423 | SCFR (v193) [ng/mL]         | 0.243640555 | PH     | 8.606493506 | 2.081581993 | 3.2   | 7.3    | 8.5   | 10     | 14   | 0.128182991 |

|     |                                 |             |        |             |             |       |        |       |        |       |             |
|-----|---------------------------------|-------------|--------|-------------|-------------|-------|--------|-------|--------|-------|-------------|
| 424 | Thrombospondin-1 (v273) [ng/mL] | 0.243212399 | All    | 11817.21656 | 4092.254984 | 913   | 9530   | 11800 | 13700  | 28100 | NA          |
| 425 | Thrombospondin-1 (v273) [ng/mL] | 0.243212399 | Non_PH | 12075.625   | 3964.994244 | 4380  | 9527.5 | 11600 | 13950  | 27300 | NA          |
| 426 | Thrombospondin-1 (v273) [ng/mL] | 0.243212399 | PH     | 11548.74026 | 4229.589763 | 913   | 9650   | 11900 | 13600  | 28100 | 0.577805285 |
| 427 | Apo H (v028) [ug/mL]            | 0.242404723 | All    | 232.1305732 | 77.90422182 | 24.5  | 192    | 234   | 282    | 416   | NA          |
| 428 | Apo H (v028) [ug/mL]            | 0.242404723 | Non_PH | 229.89375   | 83.77455029 | 24.5  | 187.75 | 222.5 | 294    | 416   | NA          |
| 429 | Apo H (v028) [ug/mL]            | 0.242404723 | PH     | 234.4545455 | 71.77473816 | 24.5  | 202    | 238   | 280    | 407   | 0.651793695 |
| 430 | Vaspin (v307) [pg/mL]           | 0.241733884 | All    | 1075.33121  | 5371.105853 | 32    | 108    | 179   | 327    | 39200 | NA          |
| 431 | Vaspin (v307) [pg/mL]           | 0.241733884 | Non_PH | 1284.15     | 6119.765411 | 32    | 121.25 | 185   | 361    | 39200 | NA          |
| 432 | Vaspin (v307) [pg/mL]           | 0.241733884 | PH     | 858.3766234 | 4493.600502 | 39    | 106    | 178   | 298    | 39200 | 0.420317958 |
| 433 | TECK (v276) [pg/mL]             | 0.241384212 | All    | 366.2834395 | 654.8238711 | 37.5  | 167    | 239   | 395    | 7800  | NA          |
| 434 | TECK (v276) [pg/mL]             | 0.241384212 | Non_PH | 330.99375   | 308.8846564 | 37.5  | 167    | 234   | 389    | 1880  | NA          |
| 435 | TECK (v276) [pg/mL]             | 0.241384212 | PH     | 402.9480519 | 882.2176214 | 37.5  | 161    | 245   | 398    | 7800  | 0.844086948 |
| 436 | PECAM-1 (v235) [ng/mL]          | 0.239794014 | All    | 61.42675159 | 16.21537883 | 23    | 50     | 61    | 74     | 109   | NA          |
| 437 | PECAM-1 (v235) [ng/mL]          | 0.239794014 | Non_PH | 59.0125     | 15.89960094 | 23    | 49     | 57    | 70     | 102   | NA          |
| 438 | PECAM-1 (v235) [ng/mL]          | 0.239794014 | PH     | 63.93506494 | 16.26130187 | 33    | 54     | 63    | 76     | 109   | 0.070164637 |
| 439 | HCC-4 (v059) [ng/mL]            | 0.239666925 | All    | 5.488535032 | 3.028559956 | 1.3   | 3.3    | 4.7   | 6.8    | 19    | NA          |
| 440 | HCC-4 (v059) [ng/mL]            | 0.239666925 | Non_PH | 5.18625     | 2.948835589 | 1.6   | 3.175  | 4.6   | 6.25   | 19    | NA          |
| 441 | HCC-4 (v059) [ng/mL]            | 0.239666925 | PH     | 5.802597403 | 3.097111304 | 1.3   | 3.4    | 5     | 7.4    | 14    | 0.156453407 |
| 442 | Cystatin-A (v069) [ng/mL]       | 0.239346169 | All    | 2.366656051 | 1.681959746 | 0.265 | 1.3    | 1.8   | 2.8    | 8.5   | NA          |
| 443 | Cystatin-A (v069) [ng/mL]       | 0.239346169 | Non_PH | 2.33775     | 1.774339403 | 0.265 | 1.2    | 1.7   | 2.85   | 8.5   | NA          |
| 444 | Cystatin-A (v069) [ng/mL]       | 0.239346169 | PH     | 2.396688312 | 1.591390407 | 0.265 | 1.4    | 1.9   | 2.8    | 8.1   | 0.380667107 |
| 445 | PARC (v246) [ng/mL]             | 0.238321862 | All    | 160.5732484 | 99.91959613 | 30    | 99     | 138   | 185    | 732   | NA          |
| 446 | PARC (v246) [ng/mL]             | 0.238321862 | Non_PH | 156.95      | 95.12974485 | 52    | 94.25  | 137   | 182.25 | 518   | NA          |
| 447 | PARC (v246) [ng/mL]             | 0.238321862 | PH     | 164.3376623 | 105.1582279 | 30    | 107    | 140   | 185    | 732   | 0.468372474 |
| 448 | Leptin-R (v179) [ng/mL]         | 0.23760867  | All    | 18.66305732 | 11.04297135 | 2.5   | 13     | 17    | 21     | 118   | NA          |
| 449 | Leptin-R (v179) [ng/mL]         | 0.23760867  | Non_PH | 17.01       | 6.699529551 | 2.5   | 13     | 16.5  | 20     | 37    | NA          |
| 450 | Leptin-R (v179) [ng/mL]         | 0.23760867  | PH     | 20.38051948 | 14.06386784 | 6.7   | 14     | 18    | 23     | 118   | 0.087127602 |
| 451 | MIF (v190) [ng/mL]              | 0.23751998  | All    | 0.550031847 | 1.408497656 | 0.005 | 0.14   | 0.31  | 0.51   | 16    | NA          |
| 452 | MIF (v190) [ng/mL]              | 0.23751998  | Non_PH | 0.440475    | 0.583523995 | 0.005 | 0.14   | 0.285 | 0.4775 | 3.6   | NA          |
| 453 | MIF (v190) [ng/mL]              | 0.23751998  | PH     | 0.663857143 | 1.921573086 | 0.02  | 0.15   | 0.32  | 0.52   | 16    | 0.460819687 |
| 454 | Resistin (v250) [ng/mL]         | 0.236874487 | All    | 3.063184713 | 1.974804774 | 0.4   | 2.2    | 2.7   | 3.6    | 22    | NA          |
| 455 | Resistin (v250) [ng/mL]         | 0.236874487 | Non_PH | 3.1505      | 2.509187119 | 0.4   | 2.1    | 2.7   | 3.4    | 22    | NA          |
| 456 | Resistin (v250) [ng/mL]         | 0.236874487 | PH     | 2.972467532 | 1.201687581 | 0.58  | 2.2    | 2.7   | 3.7    | 6.7   | 0.590885467 |

|     |                            |             |        |             |             |      |       |       |        |       |             |
|-----|----------------------------|-------------|--------|-------------|-------------|------|-------|-------|--------|-------|-------------|
| 457 | IgA (v128) [mg/mL]         | 0.236426654 | All    | 2.987006369 | 1.802772958 | 0.42 | 1.7   | 2.5   | 3.8    | 9.2   | NA          |
| 458 | IgA (v128) [mg/mL]         | 0.236426654 | Non_PH | 3.0935      | 1.941560184 | 0.62 | 1.7   | 2.55  | 3.825  | 8.7   | NA          |
| 459 | IgA (v128) [mg/mL]         | 0.236426654 | PH     | 2.876363636 | 1.651736653 | 0.42 | 1.8   | 2.5   | 3.6    | 9.2   | 0.848179172 |
| 460 | ITAC (v143) [pg/mL]        | 0.235731724 | All    | 70.41719745 | 63.46240678 | 8.5  | 34    | 49    | 81     | 358   | NA          |
| 461 | ITAC (v143) [pg/mL]        | 0.235731724 | Non_PH | 75.71875    | 74.96500634 | 8.5  | 31.5  | 48.5  | 82.25  | 358   | NA          |
| 462 | ITAC (v143) [pg/mL]        | 0.235731724 | PH     | 64.90909091 | 48.63145014 | 8.5  | 34    | 49    | 75     | 284   | 0.938402841 |
| 463 | Osteocalcin (v219) [ng/mL] | 0.235418924 | All    | 34.55796178 | 18.28895168 | 3.15 | 22    | 30    | 44     | 115   | NA          |
| 464 | Osteocalcin (v219) [ng/mL] | 0.235418924 | Non_PH | 31.91875    | 16.11058182 | 3.15 | 21    | 28.5  | 42     | 87    | NA          |
| 465 | Osteocalcin (v219) [ng/mL] | 0.235418924 | PH     | 37.3        | 20.04569779 | 7.8  | 24    | 32    | 45     | 115   | 0.076073078 |
| 466 | NAP-2 (v216) [ng/mL]       | 0.234872672 | All    | 7453.757962 | 2226.146036 | 2650 | 5990  | 7350  | 8710   | 15800 | NA          |
| 467 | NAP-2 (v216) [ng/mL]       | 0.234872672 | Non_PH | 7721.5      | 2337.183255 | 3290 | 6205  | 7580  | 9065   | 15800 | NA          |
| 468 | NAP-2 (v216) [ng/mL]       | 0.234872672 | PH     | 7175.584416 | 2083.356662 | 2650 | 5480  | 7170  | 8550   | 12100 | 0.250875449 |
| 469 | BAFF (v030) [pg/mL]        | 0.232235297 | All    | 1249.503185 | 933.8692163 | 231  | 778   | 1090  | 1460   | 9990  | NA          |
| 470 | BAFF (v030) [pg/mL]        | 0.232235297 | Non_PH | 1298.675    | 1154.231464 | 311  | 802.5 | 1100  | 1450   | 9990  | NA          |
| 471 | BAFF (v030) [pg/mL]        | 0.232235297 | PH     | 1198.415584 | 632.531055  | 231  | 714   | 1080  | 1530   | 3710  | 0.938423624 |
| 472 | ST2 (v260) [ng/mL]         | 0.230239901 | All    | 6.135031847 | 4.383723775 | 1.4  | 3.9   | 5.3   | 7.1    | 31    | NA          |
| 473 | ST2 (v260) [ng/mL]         | 0.230239901 | Non_PH | 6.0325      | 4.832138584 | 1.4  | 3.875 | 4.5   | 7.125  | 31    | NA          |
| 474 | ST2 (v260) [ng/mL]         | 0.230239901 | PH     | 6.241558442 | 3.892514769 | 1.4  | 3.9   | 5.6   | 7.1    | 25    | 0.243854883 |
| 475 | P-Selectin (v222) [ng/mL]  | 0.229278049 | All    | 130.1528662 | 38.91396915 | 53   | 105   | 126   | 153    | 250   | NA          |
| 476 | P-Selectin (v222) [ng/mL]  | 0.229278049 | Non_PH | 128.475     | 40.08629142 | 53   | 100.5 | 121   | 157.25 | 250   | NA          |
| 477 | P-Selectin (v222) [ng/mL]  | 0.229278049 | PH     | 131.8961039 | 37.84058821 | 53   | 109   | 127   | 153    | 214   | 0.402298582 |
| 478 | IL-6r (v155) [ng/mL]       | 0.228859324 | All    | 25.88853503 | 9.305167906 | 1.5  | 20    | 24    | 31     | 54    | NA          |
| 479 | IL-6r (v155) [ng/mL]       | 0.228859324 | Non_PH | 26.17875    | 9.255948395 | 7.3  | 19.75 | 24.5  | 33     | 51    | NA          |
| 480 | IL-6r (v155) [ng/mL]       | 0.228859324 | PH     | 25.58701299 | 9.407141054 | 1.5  | 21    | 24    | 29     | 54    | 0.859119398 |
| 481 | MSP (v191) [ng/mL]         | 0.228125228 | All    | 203.3566879 | 131.5047534 | 45   | 126   | 168   | 230    | 919   | NA          |
| 482 | MSP (v191) [ng/mL]         | 0.228125228 | Non_PH | 206.775     | 147.1119418 | 56   | 126   | 159   | 224    | 919   | NA          |
| 483 | MSP (v191) [ng/mL]         | 0.228125228 | PH     | 199.8051948 | 113.9117894 | 45   | 132   | 174   | 237    | 827   | 0.535391481 |
| 484 | IL-6R beta (v156) [ng/mL]  | 0.227991771 | All    | 212.8407643 | 54.11674341 | 122  | 177   | 209   | 233    | 510   | NA          |
| 485 | IL-6R beta (v156) [ng/mL]  | 0.227991771 | Non_PH | 205.175     | 48.55475182 | 122  | 170   | 203   | 230.5  | 383   | NA          |
| 486 | IL-6R beta (v156) [ng/mL]  | 0.227991771 | PH     | 220.8051948 | 58.60573866 | 133  | 191   | 213   | 238    | 510   | 0.086916611 |
| 487 | PGI (v227) [ng/mL]         | 0.227672332 | All    | 265.5987261 | 223.0456105 | 6    | 122   | 192   | 325    | 1280  | NA          |
| 488 | PGI (v227) [ng/mL]         | 0.227672332 | Non_PH | 254.0875    | 207.1628231 | 32   | 126.5 | 183.5 | 313    | 1130  | NA          |
| 489 | PGI (v227) [ng/mL]         | 0.227672332 | PH     | 277.5584416 | 239.2115609 | 6    | 122   | 196   | 357    | 1280  | 0.637972254 |

|     |                            |             |        |             |             |       |        |       |        |      |             |
|-----|----------------------------|-------------|--------|-------------|-------------|-------|--------|-------|--------|------|-------------|
| 490 | LOX-1 (v177) [ng/mL]       | 0.226128375 | All    | 1.813248408 | 1.29429652  | 0.375 | 0.96   | 1.5   | 2.3    | 9.2  | NA          |
| 491 | LOX-1 (v177) [ng/mL]       | 0.226128375 | Non_PH | 1.8515625   | 1.283051296 | 0.375 | 1.065  | 1.7   | 2.25   | 9.2  | NA          |
| 492 | LOX-1 (v177) [ng/mL]       | 0.226128375 | PH     | 1.773441558 | 1.313096296 | 0.375 | 0.96   | 1.4   | 2.3    | 7.1  | 0.424622435 |
| 493 | TBG (v279) [ug/mL]         | 0.225245611 | All    | 35.7388535  | 9.899589798 | 18    | 28     | 36    | 42     | 76   | NA          |
| 494 | TBG (v279) [ug/mL]         | 0.225245611 | Non_PH | 36.3        | 9.647456542 | 18    | 29     | 37    | 42     | 65   | NA          |
| 495 | TBG (v279) [ug/mL]         | 0.225245611 | PH     | 35.15584416 | 10.18521237 | 19    | 28     | 34    | 40     | 76   | 0.342650245 |
| 496 | Prostasin (v242) [ng/mL]   | 0.225210961 | All    | 330.4203822 | 156.2084459 | 111   | 215    | 292   | 400    | 967  | NA          |
| 497 | Prostasin (v242) [ng/mL]   | 0.225210961 | Non_PH | 325.525     | 157.0863646 | 111   | 221    | 280   | 398.5  | 855  | NA          |
| 498 | Prostasin (v242) [ng/mL]   | 0.225210961 | PH     | 335.5064935 | 156.1563507 | 118   | 213    | 313   | 424    | 967  | 0.641745302 |
| 499 | MMP-1 (v194) [ng/mL]       | 0.223131303 | All    | 18.82197452 | 11.43492365 | 0.85  | 11     | 16    | 24     | 64   | NA          |
| 500 | MMP-1 (v194) [ng/mL]       | 0.223131303 | Non_PH | 18.85375    | 12.08876394 | 3.7   | 11     | 15.5  | 22     | 64   | NA          |
| 501 | MMP-1 (v194) [ng/mL]       | 0.223131303 | PH     | 18.78896104 | 10.79295769 | 0.85  | 12     | 16    | 25     | 52   | 0.619044808 |
| 502 | MIP-1 beta (v187) [pg/mL]  | 0.221211577 | All    | 407.2356688 | 538.2642348 | 105   | 213    | 291   | 462    | 5930 | NA          |
| 503 | MIP-1 beta (v187) [pg/mL]  | 0.221211577 | Non_PH | 444.8875    | 726.4921963 | 105   | 208.75 | 284   | 462.25 | 5930 | NA          |
| 504 | MIP-1 beta (v187) [pg/mL]  | 0.221211577 | PH     | 368.1168831 | 207.4564618 | 105   | 226    | 293   | 462    | 1150 | 0.413262384 |
| 505 | Apo A-II (v021) [ng/mL]    | 0.220791508 | All    | 253.2484076 | 82.49309653 | 75    | 193    | 247   | 307    | 508  | NA          |
| 506 | Apo A-II (v021) [ng/mL]    | 0.220791508 | Non_PH | 252.4125    | 87.55550771 | 75    | 183.75 | 252   | 309    | 508  | NA          |
| 507 | Apo A-II (v021) [ng/mL]    | 0.220791508 | PH     | 254.1168831 | 77.44879022 | 106   | 217    | 245   | 303    | 493  | 0.946806062 |
| 508 | Osteopontin (v220) [ng/mL] | 0.220628736 | All    | 17.5866242  | 9.72674146  | 4.3   | 10     | 15    | 22     | 54   | NA          |
| 509 | Osteopontin (v220) [ng/mL] | 0.220628736 | Non_PH | 16.90625    | 9.921876402 | 4.3   | 9.775  | 15    | 22     | 52   | NA          |
| 510 | Osteopontin (v220) [ng/mL] | 0.220628736 | PH     | 18.29350649 | 9.532856446 | 4.8   | 12     | 17    | 22     | 54   | 0.192329477 |
| 511 | MCP-2 (v204) [pg/mL]       | 0.220278328 | All    | 75.72611465 | 61.73834484 | 13    | 47     | 60    | 78     | 539  | NA          |
| 512 | MCP-2 (v204) [pg/mL]       | 0.220278328 | Non_PH | 74.825      | 52.85297855 | 13    | 49     | 60.5  | 77.5   | 340  | NA          |
| 513 | MCP-2 (v204) [pg/mL]       | 0.220278328 | PH     | 76.66233766 | 70.13138242 | 22    | 46     | 59    | 78     | 539  | 0.881347274 |
| 514 | Adiponectin (v002) [ug/mL] | 0.219950666 | All    | 5.511592357 | 3.604039135 | 0.52  | 2.8    | 4.7   | 7      | 20   | NA          |
| 515 | Adiponectin (v002) [ug/mL] | 0.219950666 | Non_PH | 5.41025     | 3.361991564 | 0.52  | 3      | 4.65  | 6.75   | 16   | NA          |
| 516 | Adiponectin (v002) [ug/mL] | 0.219950666 | PH     | 5.616883117 | 3.858838201 | 1.4   | 2.7    | 4.7   | 7.1    | 20   | 0.938415857 |
| 517 | Apo C-I (v024) [ng/mL]     | 0.219854919 | All    | 285.6433121 | 74.82843734 | 74    | 231    | 285   | 331    | 518  | NA          |
| 518 | Apo C-I (v024) [ng/mL]     | 0.219854919 | Non_PH | 281.2625    | 77.49638517 | 74    | 231    | 279.5 | 327    | 518  | NA          |
| 519 | Apo C-I (v024) [ng/mL]     | 0.219854919 | PH     | 290.1948052 | 72.17577939 | 149   | 236    | 294   | 342    | 467  | 0.529641717 |
| 520 | IL-1RI (v147) [pg/mL]      | 0.218819716 | All    | 1336.522293 | 306.3729415 | 731   | 1100   | 1320  | 1500   | 2410 | NA          |
| 521 | IL-1RI (v147) [pg/mL]      | 0.218819716 | Non_PH | 1329.4125   | 320.1002886 | 737   | 1100   | 1315  | 1500   | 2410 | NA          |
| 522 | IL-1RI (v147) [pg/mL]      | 0.218819716 | PH     | 1343.909091 | 293.3456369 | 731   | 1170   | 1340  | 1510   | 2280 | 0.619241982 |



|     |                                 |             |        |             |             |        |         |       |       |       |             |
|-----|---------------------------------|-------------|--------|-------------|-------------|--------|---------|-------|-------|-------|-------------|
| 523 | TTR (v287) [mg/dl]              | 0.218560669 | All    | 22.26751592 | 7.203019457 | 6.2    | 17      | 22    | 26    | 56    | NA          |
| 524 | TTR (v287) [mg/dl]              | 0.218560669 | Non_PH | 22.3925     | 7.759319019 | 6.2    | 17      | 21.5  | 26    | 56    | NA          |
| 525 | TTR (v287) [mg/dl]              | 0.218560669 | PH     | 22.13766234 | 6.624238565 | 6.2    | 18      | 22    | 26    | 38    | 0.701459076 |
| 526 | Cathepsin D (v051) [ng/mL]      | 0.217979871 | All    | 486.3375796 | 250.4262662 | 220    | 353     | 422   | 541   | 2700  | NA          |
| 527 | Cathepsin D (v051) [ng/mL]      | 0.217979871 | Non_PH | 458.6125    | 163.6503291 | 220    | 345.75  | 414   | 523   | 1030  | NA          |
| 528 | Cathepsin D (v051) [ng/mL]      | 0.217979871 | PH     | 515.1428571 | 315.022126  | 246    | 367     | 440   | 554   | 2700  | 0.281019108 |
| 529 | Gelsolin (v105) [ug/mL]         | 0.217497646 | All    | 35.07006369 | 9.225879605 | 14     | 28      | 35    | 42    | 67    | NA          |
| 530 | Gelsolin (v105) [ug/mL]         | 0.217497646 | Non_PH | 35.2        | 9.245457318 | 14     | 29      | 36    | 42    | 53    | NA          |
| 531 | Gelsolin (v105) [ug/mL]         | 0.217497646 | PH     | 34.93506494 | 9.2641608   | 20     | 28      | 34    | 42    | 67    | 0.626516098 |
| 532 | IL-16 (v164) [pg/mL]            | 0.214013961 | All    | 474.6942675 | 171.8924702 | 110    | 360     | 456   | 569   | 1030  | NA          |
| 533 | IL-16 (v164) [pg/mL]            | 0.214013961 | Non_PH | 469.4875    | 178.6565189 | 149    | 351.5   | 442.5 | 570.5 | 1030  | NA          |
| 534 | IL-16 (v164) [pg/mL]            | 0.214013961 | PH     | 480.1038961 | 165.5683659 | 110    | 378     | 465   | 564   | 922   | 0.443978962 |
| 535 | THP (v266) [ug/mL]              | 0.213860501 | All    | 0.048903822 | 0.01943684  | 0.0099 | 0.034   | 0.048 | 0.061 | 0.1   | NA          |
| 536 | THP (v266) [ug/mL]              | 0.213860501 | Non_PH | 0.0504      | 0.019235779 | 0.011  | 0.03875 | 0.049 | 0.061 | 0.1   | NA          |
| 537 | THP (v266) [ug/mL]              | 0.213860501 | PH     | 0.047349351 | 0.019647891 | 0.0099 | 0.032   | 0.045 | 0.061 | 0.093 | 0.324550896 |
| 538 | CEACAM1 (v047) [ng/mL]          | 0.213796119 | All    | 17.39585987 | 5.545077402 | 1.45   | 14      | 17    | 20    | 46    | NA          |
| 539 | CEACAM1 (v047) [ng/mL]          | 0.213796119 | Non_PH | 17.1325     | 5.608149021 | 6.8    | 13.75   | 16    | 20    | 39    | NA          |
| 540 | CEACAM1 (v047) [ng/mL]          | 0.213796119 | PH     | 17.66948052 | 5.502034049 | 1.45   | 15      | 18    | 19    | 46    | 0.25967007  |
| 541 | GIP (v104) [ng/mL]              | 0.211992417 | All    | 0.448636943 | 0.419055021 | 0.0115 | 0.13    | 0.32  | 0.65  | 2.4   | NA          |
| 542 | GIP (v104) [ng/mL]              | 0.211992417 | Non_PH | 0.44134375  | 0.402367067 | 0.0115 | 0.1275  | 0.33  | 0.685 | 2.2   | NA          |
| 543 | GIP (v104) [ng/mL]              | 0.211992417 | PH     | 0.456214286 | 0.438237975 | 0.0115 | 0.13    | 0.31  | 0.63  | 2.4   | 0.94679939  |
| 544 | EN-RAGE (v076) [ng/mL]          | 0.211854504 | All    | 78.17452229 | 101.6919216 | 6.9    | 28      | 56    | 93    | 1050  | NA          |
| 545 | EN-RAGE (v076) [ng/mL]          | 0.211854504 | Non_PH | 81.755      | 121.5554141 | 6.9    | 29.5    | 57.5  | 94.75 | 1050  | NA          |
| 546 | EN-RAGE (v076) [ng/mL]          | 0.211854504 | PH     | 74.45454545 | 76.42175315 | 7.1    | 27      | 51    | 91    | 413   | 0.613087211 |
| 547 | vWF (v312) [ug/mL]              | 0.211079183 | All    | 142.9490446 | 58.93410011 | 28     | 98      | 137   | 177   | 308   | NA          |
| 548 | vWF (v312) [ug/mL]              | 0.211079183 | Non_PH | 139         | 60.43827273 | 32     | 90.5    | 128.5 | 175.5 | 301   | NA          |
| 549 | vWF (v312) [ug/mL]              | 0.211079183 | PH     | 147.0519481 | 57.43529451 | 28     | 100     | 143   | 183   | 308   | 0.372428316 |
| 550 | MCP-4 (v206) [pg/mL]            | 0.21081686  | All    | 5954.012739 | 3266.35154  | 1150   | 3940    | 5360  | 7270  | 22800 | NA          |
| 551 | MCP-4 (v206) [pg/mL]            | 0.21081686  | Non_PH | 5911.875    | 2834.188694 | 1150   | 4287.5  | 5410  | 7300  | 19300 | NA          |
| 552 | MCP-4 (v206) [pg/mL]            | 0.21081686  | PH     | 5997.792208 | 3680.505408 | 1780   | 3850    | 5280  | 7270  | 22800 | 0.527350814 |
| 553 | Aldose Reductase (v004) [ng/mL] | 0.210702366 | All    | 11.54012739 | 5.100878002 | 2.8    | 8.5     | 11    | 14    | 40    | NA          |
| 554 | Aldose Reductase (v004) [ng/mL] | 0.210702366 | Non_PH | 10.81       | 3.857545622 | 3.5    | 8.5     | 11    | 13    | 21    | NA          |
| 555 | Aldose Reductase (v004) [ng/mL] | 0.210702366 | PH     | 12.2987013  | 6.065898933 | 2.8    | 8.8     | 12    | 14    | 40    | 0.145584015 |

|     |                         |             |        |             |             |       |        |       |        |      |             |
|-----|-------------------------|-------------|--------|-------------|-------------|-------|--------|-------|--------|------|-------------|
| 556 | CD27 (v053) [U/mL]      | 0.210449443 | All    | 69.82229299 | 85.05551927 | 9.1   | 30     | 47    | 82     | 793  | NA          |
| 557 | CD27 (v053) [U/mL]      | 0.210449443 | Non_PH | 62.05125    | 65.31473944 | 9.1   | 27     | 42    | 73.25  | 409  | NA          |
| 558 | CD27 (v053) [U/mL]      | 0.210449443 | PH     | 77.8961039  | 101.4180489 | 11    | 33     | 49    | 88     | 793  | 0.098113267 |
| 559 | IL-8 (v158) [pg/mL]     | 0.210169625 | All    | 14.10382166 | 18.22726767 | 2.05  | 6.8    | 10    | 14     | 195  | NA          |
| 560 | IL-8 (v158) [pg/mL]     | 0.210169625 | Non_PH | 13.0375     | 12.07812517 | 2.05  | 6.75   | 9.55  | 14     | 65   | NA          |
| 561 | IL-8 (v158) [pg/mL]     | 0.210169625 | PH     | 15.21168831 | 22.97547734 | 2.05  | 7      | 11    | 15     | 195  | 0.393095173 |
| 562 | EGFR (v083) [ng/mL]     | 0.207600932 | All    | 3.376878981 | 0.573232907 | 0.97  | 3      | 3.4   | 3.7    | 5    | NA          |
| 563 | EGFR (v083) [ng/mL]     | 0.207600932 | Non_PH | 3.370875    | 0.598595812 | 0.97  | 3      | 3.45  | 3.8    | 5    | NA          |
| 564 | EGFR (v083) [ng/mL]     | 0.207600932 | PH     | 3.383116883 | 0.549498    | 2.1   | 2.9    | 3.4   | 3.7    | 4.6  | 0.8755825   |
| 565 | CRP (v037) [ug/mL]      | 0.207571174 | All    | 10.93178344 | 26.43074784 | 0.06  | 1.6    | 4.7   | 9.5    | 236  | NA          |
| 566 | CRP (v037) [ug/mL]      | 0.207571174 | Non_PH | 11.461875   | 29.93549339 | 0.06  | 1.475  | 4.05  | 9.25   | 236  | NA          |
| 567 | CRP (v037) [ug/mL]      | 0.207571174 | PH     | 10.38103896 | 22.40147097 | 0.14  | 2.2    | 5.3   | 9.8    | 173  | 0.306837512 |
| 568 | LRG1 (v180) [ug/mL]     | 0.206652176 | All    | 86.57324841 | 48.26651489 | 33    | 66     | 78    | 92     | 457  | NA          |
| 569 | LRG1 (v180) [ug/mL]     | 0.206652176 | Non_PH | 87.775      | 59.2381965  | 33    | 66     | 78.5  | 90.25  | 457  | NA          |
| 570 | LRG1 (v180) [ug/mL]     | 0.206652176 | PH     | 85.32467532 | 33.63247239 | 40    | 66     | 78    | 100    | 252  | 0.713601985 |
| 571 | CEACAM6 (v048) [ng/mL]  | 0.206352789 | All    | 468.7070064 | 503.4423459 | 85    | 238    | 348   | 521    | 5590 | NA          |
| 572 | CEACAM6 (v048) [ng/mL]  | 0.206352789 | Non_PH | 511.125     | 646.0115682 | 85    | 242    | 376.5 | 552.25 | 5590 | NA          |
| 573 | CEACAM6 (v048) [ng/mL]  | 0.206352789 | PH     | 424.6363636 | 287.3704701 | 101   | 232    | 341   | 486    | 1530 | 0.478141193 |
| 574 | IL-18 (v166) [pg/mL]    | 0.205405796 | All    | 242.5159236 | 140.283806  | 26    | 150    | 215   | 293    | 943  | NA          |
| 575 | IL-18 (v166) [pg/mL]    | 0.205405796 | Non_PH | 235.125     | 135.534327  | 26    | 148.75 | 213   | 286.25 | 714  | NA          |
| 576 | IL-18 (v166) [pg/mL]    | 0.205405796 | PH     | 250.1948052 | 145.5436306 | 60    | 155    | 228   | 311    | 943  | 0.458725891 |
| 577 | TFF3 (v288) [ug/mL]     | 0.205169238 | All    | 0.196802548 | 0.21739971  | 0.051 | 0.12   | 0.17  | 0.22   | 2.4  | NA          |
| 578 | TFF3 (v288) [ug/mL]     | 0.205169238 | Non_PH | 0.20425     | 0.294616056 | 0.051 | 0.1175 | 0.14  | 0.1925 | 2.4  | NA          |
| 579 | TFF3 (v288) [ug/mL]     | 0.205169238 | PH     | 0.189064935 | 0.081663033 | 0.06  | 0.13   | 0.18  | 0.22   | 0.45 | 0.028127397 |
| 580 | LH (v183) [mIU/mL]      | 0.204124157 | All    | 9.307324841 | 5.277716263 | 1.05  | 5.4    | 8.6   | 11     | 30   | NA          |
| 581 | LH (v183) [mIU/mL]      | 0.204124157 | Non_PH | 9.18625     | 4.859298635 | 1.05  | 5.775  | 8.8   | 11.25  | 25   | NA          |
| 582 | LH (v183) [mIU/mL]      | 0.204124157 | PH     | 9.433116883 | 5.70948893  | 1.05  | 5.4    | 8     | 11     | 30   | 0.805686847 |
| 583 | APRIL (v292) [ng/mL]    | 0.204087688 | All    | 3.262675159 | 1.448343166 | 0.94  | 2.4    | 3.1   | 3.8    | 10   | NA          |
| 584 | APRIL (v292) [ng/mL]    | 0.204087688 | Non_PH | 3.19        | 1.467763303 | 1     | 2.325  | 3.05  | 3.8    | 10   | NA          |
| 585 | APRIL (v292) [ng/mL]    | 0.204087688 | PH     | 3.338181818 | 1.433560829 | 0.94  | 2.4    | 3.2   | 3.8    | 8.9  | 0.375935852 |
| 586 | Insulin (v131) [uIU/mL] | 0.20406695  | All    | 2.747707006 | 4.083655645 | 0.17  | 0.65   | 1.4   | 2.8    | 25   | NA          |
| 587 | Insulin (v131) [uIU/mL] | 0.20406695  | Non_PH | 2.71575     | 3.690783518 | 0.17  | 0.7475 | 1.55  | 2.825  | 22   | NA          |
| 588 | Insulin (v131) [uIU/mL] | 0.20406695  | PH     | 2.780909091 | 4.479777127 | 0.17  | 0.62   | 1.3   | 2.6    | 25   | 0.619057055 |

|     |                            |             |        |             |             |       |        |       |       |     |             |
|-----|----------------------------|-------------|--------|-------------|-------------|-------|--------|-------|-------|-----|-------------|
| 589 | Ficolin-3 (v101) [ug/mL]   | 0.203481625 | All    | 18.7910828  | 6.0097077   | 5     | 15     | 18    | 23    | 34  | NA          |
| 590 | Ficolin-3 (v101) [ug/mL]   | 0.203481625 | Non_PH | 19.16       | 5.890919853 | 6.4   | 15     | 19    | 23    | 34  | NA          |
| 591 | Ficolin-3 (v101) [ug/mL]   | 0.203481625 | PH     | 18.40779221 | 6.14566099  | 5     | 15     | 18    | 22    | 34  | 0.29942661  |
| 592 | NSE (v213) [ng/mL]         | 0.201263088 | All    | 1.364713376 | 1.294792608 | 0.2   | 0.57   | 0.95  | 1.9   | 12  | NA          |
| 593 | NSE (v213) [ng/mL]         | 0.201263088 | Non_PH | 1.317875    | 0.956401078 | 0.2   | 0.55   | 0.965 | 1.85  | 4.3 | NA          |
| 594 | NSE (v213) [ng/mL]         | 0.201263088 | PH     | 1.413376623 | 1.576608294 | 0.29  | 0.57   | 0.95  | 1.9   | 12  | 0.804440591 |
| 595 | A2Macro (v009) [mg/mL]     | 0.19813092  | All    | 2.103821656 | 1.487550273 | 1.1   | 1.6    | 1.9   | 2.3   | 18  | NA          |
| 596 | A2Macro (v009) [mg/mL]     | 0.19813092  | Non_PH | 2.20125     | 2.000157826 | 1.1   | 1.5    | 1.9   | 2.1   | 18  | NA          |
| 597 | A2Macro (v009) [mg/mL]     | 0.19813092  | PH     | 2.002597403 | 0.602620162 | 1.1   | 1.6    | 1.9   | 2.3   | 4.6 | 0.408189075 |
| 598 | LAP TGF-b1 (v176) [ng/mL]  | 0.198123977 | All    | 10.7433121  | 2.636583694 | 3.2   | 9      | 11    | 12    | 18  | NA          |
| 599 | LAP TGF-b1 (v176) [ng/mL]  | 0.198123977 | Non_PH | 10.96375    | 2.558838925 | 5.2   | 9.175  | 11    | 13    | 18  | NA          |
| 600 | LAP TGF-b1 (v176) [ng/mL]  | 0.198123977 | PH     | 10.51428571 | 2.712675621 | 3.2   | 8.6    | 10    | 12    | 18  | 0.2847923   |
| 601 | G6PI (v109) [ng/mL]        | 0.198095714 | All    | 55.19745223 | 32.74090978 | 17    | 35     | 47    | 60    | 195 | NA          |
| 602 | G6PI (v109) [ng/mL]        | 0.198095714 | Non_PH | 55.8        | 33.70249587 | 20    | 35.75  | 44.5  | 59.25 | 195 | NA          |
| 603 | G6PI (v109) [ng/mL]        | 0.198095714 | PH     | 54.57142857 | 31.91989504 | 17    | 34     | 47    | 60    | 170 | 0.977585147 |
| 604 | M-CSF (v184) [ng/mL]       | 0.19704281  | All    | 0.707165605 | 0.461676944 | 0.125 | 0.43   | 0.61  | 0.85  | 3.9 | NA          |
| 605 | M-CSF (v184) [ng/mL]       | 0.19704281  | Non_PH | 0.70725     | 0.503704567 | 0.125 | 0.4175 | 0.555 | 0.85  | 3.9 | NA          |
| 606 | M-CSF (v184) [ng/mL]       | 0.19704281  | PH     | 0.707077922 | 0.416864353 | 0.125 | 0.43   | 0.61  | 0.83  | 2.4 | 0.761269093 |
| 607 | AAT (v007) [mg/mL]         | 0.196818015 | All    | 2.070764331 | 0.647146143 | 0.66  | 1.7    | 2     | 2.3   | 6.7 | NA          |
| 608 | AAT (v007) [mg/mL]         | 0.196818015 | Non_PH | 2.01775     | 0.565051751 | 0.66  | 1.7    | 2     | 2.4   | 3.7 | NA          |
| 609 | AAT (v007) [mg/mL]         | 0.196818015 | PH     | 2.125844156 | 0.722301422 | 0.9   | 1.8    | 2     | 2.3   | 6.7 | 0.519323238 |
| 610 | Apo E (v027) [ug/mL]       | 0.195164005 | All    | 49.60509554 | 21.08127069 | 14    | 37     | 47    | 57    | 169 | NA          |
| 611 | Apo E (v027) [ug/mL]       | 0.195164005 | Non_PH | 48.3625     | 19.47945607 | 14    | 36.5   | 47.5  | 60    | 127 | NA          |
| 612 | Apo E (v027) [ug/mL]       | 0.195164005 | PH     | 50.8961039  | 22.68235137 | 22    | 38     | 47    | 56    | 169 | 0.684961475 |
| 613 | SCF (v261) [pg/mL]         | 0.19346305  | All    | 300.9904459 | 133.4019071 | 56.5  | 214    | 294   | 377   | 719 | NA          |
| 614 | SCF (v261) [pg/mL]         | 0.19346305  | Non_PH | 304.2875    | 135.3417329 | 56.5  | 198    | 294   | 375.5 | 719 | NA          |
| 615 | SCF (v261) [pg/mL]         | 0.19346305  | PH     | 297.5649351 | 132.1552205 | 56.5  | 230    | 294   | 377   | 687 | 0.946755214 |
| 616 | Progranulin (v238) [ng/mL] | 0.192393208 | All    | 13.70191083 | 10.33408271 | 2.5   | 8.1    | 12    | 17    | 105 | NA          |
| 617 | Progranulin (v238) [ng/mL] | 0.192393208 | Non_PH | 12.4475     | 6.285284703 | 2.5   | 8.1    | 12    | 16    | 40  | NA          |
| 618 | Progranulin (v238) [ng/mL] | 0.192393208 | PH     | 15.00519481 | 13.21990023 | 3     | 8.3    | 13    | 18    | 105 | 0.354460681 |
| 619 | Tetranectin (v270) [ug/mL] | 0.191002032 | All    | 12.61592357 | 3.448030087 | 6     | 9.8    | 12    | 15    | 23  | NA          |
| 620 | Tetranectin (v270) [ug/mL] | 0.191002032 | Non_PH | 12.64125    | 3.497691599 | 6     | 9.95   | 12    | 14.25 | 23  | NA          |
| 621 | Tetranectin (v270) [ug/mL] | 0.191002032 | PH     | 12.58961039 | 3.418393914 | 7.4   | 9.8    | 12    | 15    | 22  | 0.893550389 |

|     |                             |             |        |             |             |       |        |       |         |      |             |
|-----|-----------------------------|-------------|--------|-------------|-------------|-------|--------|-------|---------|------|-------------|
| 622 | TG (v277) [ng/mL]           | 0.186892342 | All    | 41.56687898 | 93.03688777 | 7     | 7      | 19    | 39      | 1010 | NA          |
| 623 | TG (v277) [ng/mL]           | 0.186892342 | Non_PH | 36.325      | 51.75007491 | 7     | 7      | 17.5  | 41.75   | 320  | NA          |
| 624 | TG (v277) [ng/mL]           | 0.186892342 | PH     | 47.01298701 | 122.1660317 | 7     | 7      | 19    | 31      | 1010 | 0.834341287 |
| 625 | BDNF (v035) [ng/mL]         | 0.184908373 | All    | 21.48025478 | 7.82354631  | 4.6   | 16     | 22    | 27      | 44   | NA          |
| 626 | BDNF (v035) [ng/mL]         | 0.184908373 | Non_PH | 21.9725     | 7.844210556 | 4.6   | 16     | 22    | 28      | 44   | NA          |
| 627 | BDNF (v035) [ng/mL]         | 0.184908373 | PH     | 20.96883117 | 7.820271562 | 6     | 16     | 21    | 25      | 41   | 0.401833946 |
| 628 | TIE-2 (v296) [ng/mL]        | 0.184896794 | All    | 14.75159236 | 4.238659154 | 7.8   | 12     | 14    | 17      | 39   | NA          |
| 629 | TIE-2 (v296) [ng/mL]        | 0.184896794 | Non_PH | 14.87       | 4.613145773 | 7.8   | 12     | 14    | 17      | 39   | NA          |
| 630 | TIE-2 (v296) [ng/mL]        | 0.184896794 | PH     | 14.62857143 | 3.83755189  | 9.2   | 12     | 14    | 17      | 28   | 0.858723029 |
| 631 | AR (v011) [pg/mL]           | 0.180999409 | All    | 254.4203822 | 111.2566407 | 77.5  | 185    | 253   | 321     | 594  | NA          |
| 632 | AR (v011) [pg/mL]           | 0.180999409 | Non_PH | 260.68125   | 113.7111109 | 77.5  | 197.75 | 253   | 326.75  | 594  | NA          |
| 633 | AR (v011) [pg/mL]           | 0.180999409 | PH     | 247.9155844 | 109.0082808 | 77.5  | 185    | 241   | 313     | 558  | 0.353552714 |
| 634 | C3 (v064) [mg/mL]           | 0.179021399 | All    | 1.15477707  | 0.31801384  | 0.48  | 0.95   | 1.1   | 1.3     | 2.5  | NA          |
| 635 | C3 (v064) [mg/mL]           | 0.179021399 | Non_PH | 1.173875    | 0.338213826 | 0.48  | 0.985  | 1.15  | 1.325   | 2.4  | NA          |
| 636 | C3 (v064) [mg/mL]           | 0.179021399 | PH     | 1.134935065 | 0.296482108 | 0.71  | 0.94   | 1.1   | 1.3     | 2.5  | 0.266383581 |
| 637 | Kallikrein 5 (v171) [ng/mL] | 0.177526005 | All    | 3.016242038 | 1.751658706 | 0.75  | 1.9    | 2.7   | 3.9     | 9.7  | NA          |
| 638 | Kallikrein 5 (v171) [ng/mL] | 0.177526005 | Non_PH | 3.018125    | 1.740348498 | 0.75  | 1.9    | 2.75  | 3.9     | 8.8  | NA          |
| 639 | Kallikrein 5 (v171) [ng/mL] | 0.177526005 | PH     | 3.014285714 | 1.774747149 | 0.75  | 1.9    | 2.7   | 4       | 9.7  | 0.985951838 |
| 640 | VKDPS (v310) [ug/mL]        | 0.177234456 | All    | 14.29426752 | 3.559660781 | 5.7   | 12     | 14    | 16      | 25   | NA          |
| 641 | VKDPS (v310) [ug/mL]        | 0.177234456 | Non_PH | 14.21       | 3.819656025 | 5.7   | 12     | 14    | 16      | 25   | NA          |
| 642 | VKDPS (v310) [ug/mL]        | 0.177234456 | PH     | 14.38181818 | 3.290645724 | 5.9   | 12     | 15    | 16      | 23   | 0.47074039  |
| 643 | HER-2 (v127) [ng/mL]        | 0.176034524 | All    | 0.644649682 | 0.245501916 | 0.2   | 0.47   | 0.59  | 0.75    | 2    | NA          |
| 644 | HER-2 (v127) [ng/mL]        | 0.176034524 | Non_PH | 0.6305      | 0.222374413 | 0.2   | 0.47   | 0.58  | 0.77    | 1.2  | NA          |
| 645 | HER-2 (v127) [ng/mL]        | 0.176034524 | PH     | 0.659350649 | 0.268109059 | 0.3   | 0.5    | 0.61  | 0.75    | 2    | 0.542249847 |
| 646 | LGL (v175) [ng/mL]          | 0.175511352 | All    | 16.0477707  | 28.52190248 | 3.6   | 8.8    | 11    | 17      | 343  | NA          |
| 647 | LGL (v175) [ng/mL]          | 0.175511352 | Non_PH | 13.7475     | 9.271911782 | 4.5   | 8.825  | 11    | 17      | 63   | NA          |
| 648 | LGL (v175) [ng/mL]          | 0.175511352 | PH     | 18.43766234 | 39.61180725 | 3.6   | 8.8    | 11    | 17      | 343  | 0.7758762   |
| 649 | VEGF-D (v303) [pg/mL]       | 0.172124985 | All    | 311.8566879 | 184.3363099 | 216.5 | 216.5  | 216.5 | 216.5   | 1050 | NA          |
| 650 | VEGF-D (v303) [pg/mL]       | 0.172124985 | Non_PH | 280.13125   | 158.6901436 | 216.5 | 216.5  | 216.5 | 216.5   | 1050 | NA          |
| 651 | VEGF-D (v303) [pg/mL]       | 0.172124985 | PH     | 344.8181818 | 203.4977193 | 216.5 | 216.5  | 216.5 | 437     | 985  | 0.018609097 |
| 652 | KIM-1 (v173) [ng/mL]        | 0.167451482 | All    | 0.043292994 | 0.058100516 | 0.017 | 0.017  | 0.017 | 0.048   | 0.57 | NA          |
| 653 | KIM-1 (v173) [ng/mL]        | 0.167451482 | Non_PH | 0.0420625   | 0.069366271 | 0.017 | 0.017  | 0.017 | 0.04575 | 0.57 | NA          |
| 654 | KIM-1 (v173) [ng/mL]        | 0.167451482 | PH     | 0.044571429 | 0.043865053 | 0.017 | 0.017  | 0.017 | 0.053   | 0.25 | 0.11061197  |

|     |                            |             |        |             |             |       |       |      |        |     |             |
|-----|----------------------------|-------------|--------|-------------|-------------|-------|-------|------|--------|-----|-------------|
| 655 | tPSA (v244) [ng/mL]        | 0.16671347  | All    | 0.289152866 | 0.774192128 | 0.01  | 0.01  | 0.01 | 0.01   | 5   | NA          |
| 656 | tPSA (v244) [ng/mL]        | 0.16671347  | Non_PH | 0.18555     | 0.679745967 | 0.01  | 0.01  | 0.01 | 0.01   | 5   | NA          |
| 657 | tPSA (v244) [ng/mL]        | 0.16671347  | PH     | 0.396792208 | 0.852620748 | 0.01  | 0.01  | 0.01 | 0.058  | 3.8 | 0.008850469 |
| 658 | A1Micro (v008) [ug/mL]     | 0.164847628 | All    | 13.31146497 | 4.569800088 | 6.7   | 10    | 13   | 15     | 36  | NA          |
| 659 | A1Micro (v008) [ug/mL]     | 0.164847628 | Non_PH | 13.34375    | 4.88629817  | 7     | 10    | 12   | 15     | 36  | NA          |
| 660 | A1Micro (v008) [ug/mL]     | 0.164847628 | PH     | 13.27792208 | 4.247898037 | 6.7   | 10    | 13   | 15     | 28  | 0.907508448 |
| 661 | IL-10 (v159) [pg/mL]       | 0.159453404 | All    | 6.701910828 | 9.959588032 | 2.35  | 2.35  | 2.35 | 6.7    | 71  | NA          |
| 662 | IL-10 (v159) [pg/mL]       | 0.159453404 | Non_PH | 7.211875    | 11.13308515 | 2.35  | 2.35  | 2.35 | 7.725  | 71  | NA          |
| 663 | IL-10 (v159) [pg/mL]       | 0.159453404 | PH     | 6.172077922 | 8.614589421 | 2.35  | 2.35  | 5.1  | 6.2    | 69  | 0.581875386 |
| 664 | TAFI (v271) [ug/mL]        | 0.159007488 | All    | 9.521656051 | 2.203997489 | 3.3   | 8.1   | 9.2  | 11     | 20  | NA          |
| 665 | TAFI (v271) [ug/mL]        | 0.159007488 | Non_PH | 9.635       | 2.362422057 | 3.3   | 8.075 | 9.4  | 11     | 20  | NA          |
| 666 | TAFI (v271) [ug/mL]        | 0.159007488 | PH     | 9.403896104 | 2.035180165 | 5.7   | 8.2   | 9.1  | 11     | 15  | 0.434853485 |
| 667 | Apo A-I (v020) [mg/mL]     | 0.157222375 | All    | 1.572484076 | 0.399993038 | 0.6   | 1.3   | 1.5  | 1.8    | 3.5 | NA          |
| 668 | Apo A-I (v020) [mg/mL]     | 0.157222375 | Non_PH | 1.605875    | 0.446161388 | 0.6   | 1.3   | 1.6  | 1.8    | 3.5 | NA          |
| 669 | Apo A-I (v020) [mg/mL]     | 0.157222375 | PH     | 1.537792208 | 0.345107243 | 0.8   | 1.3   | 1.5  | 1.8    | 2.2 | 0.348270742 |
| 670 | SOD-1 (v263) [ng/mL]       | 0.150628639 | All    | 22.55607643 | 19.41885976 | 0.044 | 13    | 17   | 24     | 154 | NA          |
| 671 | SOD-1 (v263) [ng/mL]       | 0.150628639 | Non_PH | 22.425      | 15.99650674 | 8.6   | 13    | 17   | 25.25  | 115 | NA          |
| 672 | SOD-1 (v263) [ng/mL]       | 0.150628639 | PH     | 22.69225974 | 22.53897131 | 0.044 | 13    | 18   | 23     | 154 | 0.893739643 |
| 673 | MIP-3 alpha (v188) [pg/mL] | 0.148927467 | All    | 46.50955414 | 59.22670675 | 15    | 15    | 32   | 50     | 374 | NA          |
| 674 | MIP-3 alpha (v188) [pg/mL] | 0.148927467 | Non_PH | 48.6625     | 63.24714308 | 15    | 15    | 32   | 49.25  | 374 | NA          |
| 675 | MIP-3 alpha (v188) [pg/mL] | 0.148927467 | PH     | 44.27272727 | 55.06518538 | 15    | 15    | 32   | 50     | 309 | 0.86004235  |
| 676 | CA-125 (v041) [U/mL]       | 0.14778135  | All    | 7.460509554 | 6.005486359 | 2.7   | 2.7   | 6.4  | 9.4    | 30  | NA          |
| 677 | CA-125 (v041) [U/mL]       | 0.14778135  | Non_PH | 6.83        | 5.500411952 | 2.7   | 2.7   | 4.2  | 9.1    | 27  | NA          |
| 678 | CA-125 (v041) [U/mL]       | 0.14778135  | PH     | 8.115584416 | 6.459714531 | 2.7   | 2.7   | 6.4  | 10     | 30  | 0.15993069  |
| 679 | HE4 (v119) [pM]            | 0.14445941  | All    | 98.45859873 | 81.76349496 | 48.5  | 48.5  | 48.5 | 116    | 561 | NA          |
| 680 | HE4 (v119) [pM]            | 0.14445941  | Non_PH | 96.68125    | 91.62572616 | 48.5  | 48.5  | 48.5 | 113.75 | 561 | NA          |
| 681 | HE4 (v119) [pM]            | 0.14445941  | PH     | 100.3051948 | 70.63248823 | 48.5  | 48.5  | 48.5 | 130    | 348 | 0.229045664 |
| 682 | GLP-1 total (v108) [pg/mL] | 0.138487138 | All    | 11.62452229 | 10.12731236 | 3.65  | 3.65  | 8.9  | 17     | 60  | NA          |
| 683 | GLP-1 total (v108) [pg/mL] | 0.138487138 | Non_PH | 11.9575     | 10.17551075 | 3.65  | 3.65  | 9    | 17     | 60  | NA          |
| 684 | GLP-1 total (v108) [pg/mL] | 0.138487138 | PH     | 11.27857143 | 10.13196943 | 3.65  | 3.65  | 7.9  | 16     | 56  | 0.475774512 |
| 685 | FABP, liver (v092) [ng/mL] | 0.138027902 | All    | 14.49681529 | 10.97644576 | 6     | 6     | 12   | 20     | 58  | NA          |
| 686 | FABP, liver (v092) [ng/mL] | 0.138027902 | Non_PH | 13.3375     | 11.13546478 | 6     | 6     | 6    | 17     | 58  | NA          |
| 687 | FABP, liver (v092) [ng/mL] | 0.138027902 | PH     | 15.7012987  | 10.74839637 | 6     | 6     | 13   | 21     | 48  | 0.053402059 |

|     |                            |             |        |             |             |        |        |        |        |       |             |
|-----|----------------------------|-------------|--------|-------------|-------------|--------|--------|--------|--------|-------|-------------|
| 688 | IgE (v129) [U/mL]          | 0.122469713 | All    | 39.52547771 | 148.2078279 | 5.5    | 5.5    | 11     | 22     | 1750  | NA          |
| 689 | IgE (v129) [U/mL]          | 0.122469713 | Non_PH | 31.93125    | 62.03677675 | 5.5    | 5.5    | 11.5   | 24.25  | 450   | NA          |
| 690 | IgE (v129) [U/mL]          | 0.122469713 | PH     | 47.41558442 | 202.393042  | 5.5    | 5.5    | 11     | 19     | 1750  | 0.453020944 |
| 691 | PSA-f (v243) [ng/mL]       | 0.115328247 | All    | 0.034063694 | 0.064560614 | 0.013  | 0.013  | 0.013  | 0.013  | 0.45  | NA          |
| 692 | PSA-f (v243) [ng/mL]       | 0.115328247 | Non_PH | 0.022975    | 0.035605068 | 0.013  | 0.013  | 0.013  | 0.013  | 0.19  | NA          |
| 693 | PSA-f (v243) [ng/mL]       | 0.115328247 | PH     | 0.045584416 | 0.083509588 | 0.013  | 0.013  | 0.013  | 0.013  | 0.45  | 0.015164149 |
| 694 | SCCA-1 (v259) [ng/mL]      | 0.104214398 | All    | 0.655031847 | 0.566031647 | 0.26   | 0.26   | 0.59   | 0.83   | 4.8   | NA          |
| 695 | SCCA-1 (v259) [ng/mL]      | 0.104214398 | Non_PH | 0.61425     | 0.412257677 | 0.26   | 0.26   | 0.59   | 0.8    | 2.3   | NA          |
| 696 | SCCA-1 (v259) [ng/mL]      | 0.104214398 | PH     | 0.697402597 | 0.690949771 | 0.26   | 0.26   | 0.59   | 0.83   | 4.8   | 0.831150659 |
| 697 | S100-B (v252) [ng/mL]      | 0.101789231 | All    | 0.276433121 | 0.213465042 | 0.115  | 0.115  | 0.27   | 0.38   | 1.5   | NA          |
| 698 | S100-B (v252) [ng/mL]      | 0.101789231 | Non_PH | 0.2620625   | 0.23578269  | 0.115  | 0.115  | 0.115  | 0.34   | 1.5   | NA          |
| 699 | S100-B (v252) [ng/mL]      | 0.101789231 | PH     | 0.291363636 | 0.187887558 | 0.115  | 0.115  | 0.27   | 0.38   | 0.95  | 0.091238086 |
| 700 | IL-12p40 (v160) [ng/mL]    | 0.099755154 | All    | 0.185796178 | 0.127993026 | 0.11   | 0.11   | 0.11   | 0.25   | 0.93  | NA          |
| 701 | IL-12p40 (v160) [ng/mL]    | 0.099755154 | Non_PH | 0.1805      | 0.117795145 | 0.11   | 0.11   | 0.11   | 0.25   | 0.66  | NA          |
| 702 | IL-12p40 (v160) [ng/mL]    | 0.099755154 | PH     | 0.191298701 | 0.138358332 | 0.11   | 0.11   | 0.11   | 0.25   | 0.93  | 0.585378393 |
| 703 | IFN-alpha (v140) [ng/mL]   | 0.094671477 | All    | 0.008082803 | 0.011197208 | 0.0043 | 0.0043 | 0.0043 | 0.0043 | 0.099 | NA          |
| 704 | IFN-alpha (v140) [ng/mL]   | 0.094671477 | Non_PH | 0.00847625  | 0.012935441 | 0.0043 | 0.0043 | 0.0043 | 0.0043 | 0.099 | NA          |
| 705 | IFN-alpha (v140) [ng/mL]   | 0.094671477 | PH     | 0.007674026 | 0.009115421 | 0.0043 | 0.0043 | 0.0043 | 0.0043 | 0.046 | 0.641300017 |
| 706 | FABP, heart (v091) [ng/mL] | 0.08146149  | All    | 7.701273885 | 10.78674987 | 3.45   | 3.45   | 3.45   | 9.2    | 106   | NA          |
| 707 | FABP, heart (v091) [ng/mL] | 0.08146149  | Non_PH | 7.931875    | 13.65960561 | 3.45   | 3.45   | 3.45   | 7.8    | 106   | NA          |
| 708 | FABP, heart (v091) [ng/mL] | 0.08146149  | PH     | 7.461688312 | 6.690866202 | 3.45   | 3.45   | 3.45   | 9.7    | 32    | 0.208625864 |
| 709 | VEGFR-1 (v304) [pg/mL]     | 0.075484144 | All    | 98.00636943 | 150.4946756 | 59     | 59     | 59     | 59     | 1230  | NA          |
| 710 | VEGFR-1 (v304) [pg/mL]     | 0.075484144 | Non_PH | 76.2125     | 55.90355478 | 59     | 59     | 59     | 59     | 415   | NA          |
| 711 | VEGFR-1 (v304) [pg/mL]     | 0.075484144 | PH     | 120.6493506 | 205.4783102 | 59     | 59     | 59     | 59     | 1230  | 0.34439644  |
| 712 | HB-EGF (v122) [pg/mL]      | 0.075047085 | All    | 38.72611465 | 20.11843505 | 28     | 28     | 28     | 28     | 118   | NA          |
| 713 | HB-EGF (v122) [pg/mL]      | 0.075047085 | Non_PH | 40.35       | 21.75996789 | 28     | 28     | 28     | 57.25  | 118   | NA          |
| 714 | HB-EGF (v122) [pg/mL]      | 0.075047085 | PH     | 37.03896104 | 18.24716384 | 28     | 28     | 28     | 28     | 115   | 0.370406852 |

**Supplemental Table S3:** Pearson correlation of RAGE protein levels with FVC % predicted in the DETECT cohort.

|    | Analyte                     | MeanDecreaseGini | patient type | mean        | sd          | min  | Q1     | median | Q3     | max   | p.wilcox    |
|----|-----------------------------|------------------|--------------|-------------|-------------|------|--------|--------|--------|-------|-------------|
| 1  | RAGE (v248) [ng/mL]         | 2.157637526      | All          | 5.918181818 | 4.686872946 | 0.38 | 2.6    | 4.4    | 8.075  | 17    | NA          |
| 2  | RAGE (v248) [ng/mL]         | 2.157637526      | SSC-no PAH   | 2.835       | 1.983961285 | 0.38 | 0.8875 | 2.7    | 4.225  | 7.9   | NA          |
| 3  | RAGE (v248) [ng/mL]         | 2.157637526      | SSC-PAH      | 9.001363636 | 4.596317673 | 0.83 | 6.275  | 8.15   | 13.5   | 17    | 6.39E-07    |
| 4  | IGFBP-7 (v138) [ng/mL]      | 1.407871854      | All          | 56.86363636 | 24.86857633 | 20   | 41.5   | 52.5   | 65.75  | 142   | NA          |
| 5  | IGFBP-7 (v138) [ng/mL]      | 1.407871854      | SSC-no PAH   | 43.86363636 | 13.76432744 | 20   | 33.5   | 42.5   | 52.75  | 78    | NA          |
| 6  | IGFBP-7 (v138) [ng/mL]      | 1.407871854      | SSC-PAH      | 69.86363636 | 26.88475485 | 35   | 50.75  | 62     | 80.25  | 142   | 7.57E-05    |
| 7  | Endostatin (v078) [ng/mL]   | 1.377863793      | All          | 96.65909091 | 35.08722896 | 48   | 71.75  | 87.5   | 117    | 202   | NA          |
| 8  | Endostatin (v078) [ng/mL]   | 1.377863793      | SSC-no PAH   | 84          | 30.80661648 | 48   | 67     | 74.5   | 88.75  | 195   | NA          |
| 9  | Endostatin (v078) [ng/mL]   | 1.377863793      | SSC-PAH      | 109.3181818 | 35.15731498 | 65   | 86.25  | 105.5  | 120.75 | 202   | 0.001875236 |
| 10 | Collagen IV (v063) [ng/mL]  | 1.368275677      | All          | 147.7272727 | 93.53779578 | 49   | 86.25  | 118    | 169.75 | 534   | NA          |
| 11 | Collagen IV (v063) [ng/mL]  | 1.368275677      | SSC-no PAH   | 102.7727273 | 46.41318759 | 49   | 70.5   | 89.5   | 118    | 261   | NA          |
| 12 | Collagen IV (v063) [ng/mL]  | 1.368275677      | SSC-PAH      | 192.6818182 | 107.3629298 | 80   | 117    | 160    | 230.5  | 534   | 0.000101891 |
| 13 | MMP-2 (v195) [ng/mL]        | 1.243937651      | All          | 1989.227273 | 593.6606917 | 951  | 1575   | 2010   | 2252.5 | 3460  | NA          |
| 14 | MMP-2 (v195) [ng/mL]        | 1.243937651      | SSC-no PAH   | 1701.636364 | 533.8792039 | 951  | 1370   | 1635   | 1995   | 2950  | NA          |
| 15 | MMP-2 (v195) [ng/mL]        | 1.243937651      | SSC-PAH      | 2276.818182 | 513.1544496 | 1500 | 2015   | 2155   | 2582.5 | 3460  | 0.000221679 |
| 16 | TIMP-2 (v281) [ng/mL]       | 1.086338466      | All          | 88.56818182 | 18.48367945 | 55   | 75.75  | 86     | 100.5  | 137   | NA          |
| 17 | TIMP-2 (v281) [ng/mL]       | 1.086338466      | SSC-no PAH   | 79.90909091 | 17.21546672 | 55   | 67     | 78.5   | 86.5   | 123   | NA          |
| 18 | TIMP-2 (v281) [ng/mL]       | 1.086338466      | SSC-PAH      | 97.22727273 | 15.68721596 | 67   | 87     | 95.5   | 106    | 137   | 0.000947423 |
| 19 | NT proBNP (v211) [pg/mL]    | 1.018179888      | All          | 2944.386364 | 7403.875742 | 29   | 384    | 863.5  | 2140   | 48200 | NA          |
| 20 | NT proBNP (v211) [pg/mL]    | 1.018179888      | SSC-no PAH   | 904.3636364 | 1794.116643 | 29   | 230.5  | 462    | 801.5  | 8670  | NA          |
| 21 | NT proBNP (v211) [pg/mL]    | 1.018179888      | SSC-PAH      | 4984.409091 | 10015.31385 | 363  | 1011   | 2070   | 4737.5 | 48200 | 3.74E-05    |
| 22 | Neuropilin-1 (v215) [ng/mL] | 0.944577145      | All          | 243.5454545 | 72.81561759 | 121  | 199    | 228    | 272.75 | 429   | NA          |
| 23 | Neuropilin-1 (v215) [ng/mL] | 0.944577145      | SSC-no PAH   | 206.9090909 | 55.20861656 | 121  | 167.25 | 199    | 238.25 | 355   | NA          |
| 24 | Neuropilin-1 (v215) [ng/mL] | 0.944577145      | SSC-PAH      | 280.1818182 | 70.68551166 | 203  | 227.5  | 255.5  | 330    | 429   | 0.000168894 |
| 25 | ALP (v017) [ng/mL]          | 0.907595397      | All          | 34.45454545 | 8.622454583 | 24   | 27     | 32     | 43     | 55    | NA          |
| 26 | ALP (v017) [ng/mL]          | 0.907595397      | SSC-no PAH   | 32.5        | 9.059328263 | 24   | 26.25  | 29     | 35.5   | 55    | NA          |
| 27 | ALP (v017) [ng/mL]          | 0.907595397      | SSC-PAH      | 36.40909091 | 7.884035049 | 25   | 29     | 35.5   | 43     | 49    | 0.089010131 |
| 28 | Cystatin-C (v071) [ng/mL]   | 0.880869413      | All          | 1182.795455 | 321.1624656 | 703  | 972.25 | 1135   | 1392.5 | 2180  | NA          |
| 29 | Cystatin-C (v071) [ng/mL]   | 0.880869413      | SSC-no PAH   | 1072.227273 | 349.6127016 | 703  | 815    | 1015   | 1142.5 | 2180  | NA          |

|    |                             |             |            |             |             |      |        |       |        |      |             |
|----|-----------------------------|-------------|------------|-------------|-------------|------|--------|-------|--------|------|-------------|
| 30 | Cystatin-C (v071) [ng/mL]   | 0.880869413 | SSC-PAH    | 1293.363636 | 251.7108215 | 879  | 1110   | 1265  | 1472.5 | 1820 | 0.003273021 |
| 31 | SP-D (v247) [ng/mL]         | 0.88023308  | All        | 32.75227273 | 22.7655951  | 4.1  | 16     | 29    | 41.25  | 101  | NA          |
| 32 | SP-D (v247) [ng/mL]         | 0.88023308  | SSC-no PAH | 29.07272727 | 22.86494888 | 4.6  | 13.75  | 19.5  | 36.25  | 92   | NA          |
| 33 | SP-D (v247) [ng/mL]         | 0.88023308  | SSC-PAH    | 36.43181818 | 22.58430526 | 4.1  | 22.75  | 32.5  | 44.5   | 101  | 0.123165838 |
| 34 | PPP (v223) [pg/mL]          | 0.770204927 | All        | 327.6136364 | 296.0767669 | 25   | 131.5  | 218   | 364    | 1370 | NA          |
| 35 | PPP (v223) [pg/mL]          | 0.770204927 | SSC-no PAH | 327.3181818 | 321.5387685 | 25   | 116.75 | 207   | 357    | 1370 | NA          |
| 36 | PPP (v223) [pg/mL]          | 0.770204927 | SSC-PAH    | 327.9090909 | 275.8802206 | 81   | 143    | 226.5 | 394.25 | 1110 | 0.714221698 |
| 37 | VCAM-1 (v299) [ng/mL]       | 0.734830955 | All        | 1036.181818 | 417.344611  | 440  | 767.75 | 923.5 | 1167.5 | 2450 | NA          |
| 38 | VCAM-1 (v299) [ng/mL]       | 0.734830955 | SSC-no PAH | 855.6818182 | 290.5196307 | 440  | 693.25 | 784   | 931.5  | 1800 | NA          |
| 39 | VCAM-1 (v299) [ng/mL]       | 0.734830955 | SSC-PAH    | 1216.681818 | 451.643811  | 653  | 894.5  | 1115  | 1417.5 | 2450 | 0.001203873 |
| 40 | IGFBP-2 (v133) [ng/mL]      | 0.715134658 | All        | 175.4545455 | 127.7949765 | 43   | 97.5   | 129   | 239.75 | 550  | NA          |
| 41 | IGFBP-2 (v133) [ng/mL]      | 0.715134658 | SSC-no PAH | 133.5909091 | 115.192038  | 43   | 59.5   | 102   | 125.25 | 541  | NA          |
| 42 | IGFBP-2 (v133) [ng/mL]      | 0.715134658 | SSC-PAH    | 217.3181818 | 128.4506154 | 98   | 132.25 | 157   | 260.25 | 550  | 0.001046354 |
| 43 | CA-9 (v045) [ng/mL]         | 0.694458374 | All        | 0.416363636 | 0.09976929  | 0.37 | 0.37   | 0.37  | 0.43   | 0.91 | NA          |
| 44 | CA-9 (v045) [ng/mL]         | 0.694458374 | SSC-no PAH | 0.396363636 | 0.053944015 | 0.37 | 0.37   | 0.37  | 0.385  | 0.57 | NA          |
| 45 | CA-9 (v045) [ng/mL]         | 0.694458374 | SSC-PAH    | 0.436363636 | 0.128971959 | 0.37 | 0.37   | 0.37  | 0.445  | 0.91 | 0.215967232 |
| 46 | MSLN (v201) [nM]            | 0.658890944 | All        | 21.86363636 | 11.73204895 | 3.8  | 12.75  | 22    | 29     | 58   | NA          |
| 47 | MSLN (v201) [nM]            | 0.658890944 | SSC-no PAH | 19.46818182 | 8.379418457 | 6.3  | 11.25  | 20    | 26.75  | 32   | NA          |
| 48 | MSLN (v201) [nM]            | 0.658890944 | SSC-PAH    | 24.25909091 | 14.12794121 | 3.8  | 14     | 23.5  | 30.75  | 58   | 0.342022383 |
| 49 | ANG-2 (v014) [ng/mL]        | 0.654694364 | All        | 6.881818182 | 7.209563182 | 1.2  | 2.45   | 5.15  | 7.95   | 39   | NA          |
| 50 | ANG-2 (v014) [ng/mL]        | 0.654694364 | SSC-no PAH | 3.895454545 | 2.771019629 | 1.2  | 2.1    | 2.65  | 5.225  | 12   | NA          |
| 51 | ANG-2 (v014) [ng/mL]        | 0.654694364 | SSC-PAH    | 9.868181818 | 8.947965258 | 1.7  | 3.925  | 7.35  | 9.95   | 39   | 0.000787118 |
| 52 | MIP-3 beta (v189) [pg/mL]   | 0.623668111 | All        | 783.5681818 | 752.3242249 | 195  | 389    | 528.5 | 797    | 4140 | NA          |
| 53 | MIP-3 beta (v189) [pg/mL]   | 0.623668111 | SSC-no PAH | 716.1363636 | 820.7097564 | 195  | 315.5  | 482   | 742.75 | 4140 | NA          |
| 54 | MIP-3 beta (v189) [pg/mL]   | 0.623668111 | SSC-PAH    | 851         | 689.8143297 | 316  | 465.75 | 612.5 | 960.5  | 3350 | 0.17698855  |
| 55 | CD5L (v052) [ng/mL]         | 0.612749195 | All        | 3833.181818 | 1700.902322 | 1180 | 2660   | 3420  | 4787.5 | 8010 | NA          |
| 56 | CD5L (v052) [ng/mL]         | 0.612749195 | SSC-no PAH | 3155        | 1140.178557 | 1180 | 2405   | 2980  | 3750   | 5720 | NA          |
| 57 | CD5L (v052) [ng/mL]         | 0.612749195 | SSC-PAH    | 4511.363636 | 1913.17312  | 1560 | 2835   | 4475  | 6040   | 8010 | 0.016971549 |
| 58 | FGF-23 (v098) [ng/mL]       | 0.598754567 | All        | 0.341590909 | 0.398263342 | 0.18 | 0.18   | 0.18  | 0.3175 | 2.4  | NA          |
| 59 | FGF-23 (v098) [ng/mL]       | 0.598754567 | SSC-no PAH | 0.240909091 | 0.217341274 | 0.18 | 0.18   | 0.18  | 0.18   | 1.2  | NA          |
| 60 | FGF-23 (v098) [ng/mL]       | 0.598754567 | SSC-PAH    | 0.442272727 | 0.506264864 | 0.18 | 0.18   | 0.27  | 0.44   | 2.4  | 0.006202614 |
| 61 | MMP-9, total (v199) [ng/mL] | 0.594539294 | All        | 1383.477273 | 543.8507614 | 481  | 1035   | 1300  | 1790   | 2980 | NA          |
| 62 | MMP-9, total (v199) [ng/mL] | 0.594539294 | SSC-no PAH | 1390.545455 | 432.5313891 | 481  | 1152.5 | 1420  | 1710   | 2010 | NA          |



|    |                             |             |            |             |             |      |        |       |        |       |             |
|----|-----------------------------|-------------|------------|-------------|-------------|------|--------|-------|--------|-------|-------------|
| 63 | MMP-9, total (v199) [ng/mL] | 0.594539294 | SSC-PAH    | 1376.409091 | 646.8722299 | 543  | 942.75 | 1300  | 1790   | 2980  | 0.7142647   |
| 64 | TIMP-1 (v280) [ng/mL]       | 0.555521187 | All        | 167.6136364 | 50.2052605  | 107  | 138.5  | 157.5 | 186    | 419   | NA          |
| 65 | TIMP-1 (v280) [ng/mL]       | 0.555521187 | SSC-no PAH | 149.4090909 | 31.00638811 | 107  | 128    | 139   | 163    | 230   | NA          |
| 66 | TIMP-1 (v280) [ng/mL]       | 0.555521187 | SSC-PAH    | 185.8181818 | 59.20636739 | 125  | 153.5  | 173   | 198.75 | 419   | 0.002047438 |
| 67 | Eotaxin-2 (v080) [pg/mL]    | 0.548358411 | All        | 876.7727273 | 682.4204482 | 105  | 406.5  | 656.5 | 1215   | 3390  | NA          |
| 68 | Eotaxin-2 (v080) [pg/mL]    | 0.548358411 | SSC-no PAH | 730.1818182 | 510.0656014 | 120  | 360.5  | 579   | 1051.5 | 2110  | NA          |
| 69 | Eotaxin-2 (v080) [pg/mL]    | 0.548358411 | SSC-PAH    | 1023.363636 | 805.2205581 | 105  | 527.5  | 704.5 | 1395   | 3390  | 0.171389864 |
| 70 | 6Ckine (v001) [pg/mL]       | 0.543345411 | All        | 407.4545455 | 139.4408192 | 212  | 313    | 389   | 464.25 | 800   | NA          |
| 71 | 6Ckine (v001) [pg/mL]       | 0.543345411 | SSC-no PAH | 357.2727273 | 101.8229939 | 212  | 294.5  | 346.5 | 412.5  | 655   | NA          |
| 72 | 6Ckine (v001) [pg/mL]       | 0.543345411 | SSC-PAH    | 457.6363636 | 155.4644487 | 225  | 336    | 441   | 516.75 | 800   | 0.017242836 |
| 73 | B2M (v032) [ug/mL]          | 0.490770571 | All        | 2.475       | 0.777331452 | 1.2  | 2      | 2.3   | 2.775  | 4.6   | NA          |
| 74 | B2M (v032) [ug/mL]          | 0.490770571 | SSC-no PAH | 2.240909091 | 0.728115043 | 1.2  | 1.825  | 2.2   | 2.475  | 4.6   | NA          |
| 75 | B2M (v032) [ug/mL]          | 0.490770571 | SSC-PAH    | 2.709090909 | 0.769606635 | 1.4  | 2.125  | 2.6   | 3.175  | 4.1   | 0.037117758 |
| 76 | VEGF (v300) [pg/mL]         | 0.484691445 | All        | 379.8863636 | 244.1504698 | 42   | 219.5  | 348   | 470    | 1440  | NA          |
| 77 | VEGF (v300) [pg/mL]         | 0.484691445 | SSC-no PAH | 331.5       | 153.1916789 | 42   | 224.5  | 339.5 | 411    | 759   | NA          |
| 78 | VEGF (v300) [pg/mL]         | 0.484691445 | SSC-PAH    | 428.2727273 | 306.0789163 | 111  | 212.75 | 354   | 598.75 | 1440  | 0.533754882 |
| 79 | I-309 (v265) [pg/mL]        | 0.478202174 | All        | 863.5681818 | 3846.891148 | 117  | 117    | 128.5 | 226    | 25600 | NA          |
| 80 | I-309 (v265) [pg/mL]        | 0.478202174 | SSC-no PAH | 204.8636364 | 262.2939637 | 117  | 117    | 117   | 193.75 | 1350  | NA          |
| 81 | I-309 (v265) [pg/mL]        | 0.478202174 | SSC-PAH    | 1522.272727 | 5415.157652 | 117  | 117    | 165   | 277.75 | 25600 | 0.078424397 |
| 82 | E-Cad (v038) [ng/mL]        | 0.477367358 | All        | 2516.090909 | 1372.061695 | 928  | 1540   | 2095  | 3060   | 7850  | NA          |
| 83 | E-Cad (v038) [ng/mL]        | 0.477367358 | SSC-no PAH | 2044.909091 | 878.7928359 | 928  | 1302.5 | 1915  | 2297.5 | 4720  | NA          |
| 84 | E-Cad (v038) [ng/mL]        | 0.477367358 | SSC-PAH    | 2987.272727 | 1617.809165 | 1270 | 1890   | 2615  | 3535   | 7850  | 0.019366164 |
| 85 | Leptin (v178) [ng/mL]       | 0.474415644 | All        | 25.29113636 | 22.26857241 | 0.51 | 6.85   | 18.5  | 36.5   | 87    | NA          |
| 86 | Leptin (v178) [ng/mL]       | 0.474415644 | SSC-no PAH | 29.94545455 | 22.91241558 | 3.2  | 10.525 | 25.5  | 47     | 82    | NA          |
| 87 | Leptin (v178) [ng/mL]       | 0.474415644 | SSC-PAH    | 20.63681818 | 21.09561936 | 0.51 | 4.35   | 15    | 34.75  | 87    | 0.07716612  |
| 88 | GH (v116) [ng/mL]           | 0.470167192 | All        | 1.466136364 | 2.672149397 | 0.15 | 0.18   | 0.34  | 1.8    | 13    | NA          |
| 89 | GH (v116) [ng/mL]           | 0.470167192 | SSC-no PAH | 1.378181818 | 2.938870266 | 0.15 | 0.1575 | 0.2   | 0.88   | 13    | NA          |
| 90 | GH (v116) [ng/mL]           | 0.470167192 | SSC-PAH    | 1.554090909 | 2.442870402 | 0.15 | 0.2    | 0.45  | 1.875  | 9.3   | 0.293429702 |
| 91 | cFib (v057) [ug/mL]         | 0.468118494 | All        | 4.454545455 | 3.125770941 | 1.4  | 1.925  | 3.45  | 6.2    | 14    | NA          |
| 92 | cFib (v057) [ug/mL]         | 0.468118494 | SSC-no PAH | 3.068181818 | 2.127459107 | 1.4  | 1.4    | 2.45  | 3.8    | 9.9   | NA          |
| 93 | cFib (v057) [ug/mL]         | 0.468118494 | SSC-PAH    | 5.840909091 | 3.384229404 | 1.4  | 3.325  | 5.75  | 7.225  | 14    | 0.001534267 |
| 94 | Nr-CAM (v214) [ng/mL]       | 0.447883105 | All        | 0.340681818 | 0.196899192 | 0.23 | 0.23   | 0.23  | 0.3375 | 1.1   | NA          |
| 95 | Nr-CAM (v214) [ng/mL]       | 0.447883105 | SSC-no PAH | 0.288636364 | 0.188636598 | 0.23 | 0.23   | 0.23  | 0.2525 | 1.1   | NA          |

|     |                           |             |            |             |             |      |        |       |        |      |             |
|-----|---------------------------|-------------|------------|-------------|-------------|------|--------|-------|--------|------|-------------|
| 96  | Nr-CAM (v214) [ng/mL]     | 0.447883105 | SSC-PAH    | 0.392727273 | 0.195257628 | 0.23 | 0.23   | 0.32  | 0.5125 | 0.9  | 0.003975698 |
| 97  | MMP-9 (v198) [ng/mL]      | 0.447300418 | All        | 33.52272727 | 1.62091901  | 33   | 33     | 33    | 33     | 40   | NA          |
| 98  | MMP-9 (v198) [ng/mL]      | 0.447300418 | SSC-no PAH | 33.59090909 | 1.680677044 | 33   | 33     | 33    | 33     | 40   | NA          |
| 99  | MMP-9 (v198) [ng/mL]      | 0.447300418 | SSC-PAH    | 33.45454545 | 1.59544807  | 33   | 33     | 33    | 33     | 40   | 0.93448667  |
| 100 | tPA (v283) [ng/mL]        | 0.445267005 | All        | 1.837727273 | 0.816116338 | 0.83 | 1.4    | 1.6   | 2.2    | 4.5  | NA          |
| 101 | tPA (v283) [ng/mL]        | 0.445267005 | SSC-no PAH | 1.908181818 | 0.798228016 | 0.86 | 1.4    | 1.65  | 2.275  | 4.3  | NA          |
| 102 | tPA (v283) [ng/mL]        | 0.445267005 | SSC-PAH    | 1.767272727 | 0.846309534 | 0.83 | 1.3    | 1.6   | 1.975  | 4.5  | 0.480481091 |
| 103 | GDF-15 (v115) [ng/mL]     | 0.426373622 | All        | 1.307272727 | 0.909853972 | 0.39 | 0.7875 | 1     | 1.425  | 4.7  | NA          |
| 104 | GDF-15 (v115) [ng/mL]     | 0.426373622 | SSC-no PAH | 1.006363636 | 0.785090504 | 0.39 | 0.5925 | 0.82  | 1.075  | 4.1  | NA          |
| 105 | GDF-15 (v115) [ng/mL]     | 0.426373622 | SSC-PAH    | 1.608181818 | 0.942871179 | 0.6  | 0.9925 | 1.3   | 1.775  | 4.7  | 0.000584161 |
| 106 | Hemopexin (v121) [ug/mL]  | 0.411748814 | All        | 1546.75     | 247.1824601 | 827  | 1427.5 | 1515  | 1692.5 | 2300 | NA          |
| 107 | Hemopexin (v121) [ug/mL]  | 0.411748814 | SSC-no PAH | 1611.818182 | 266.2908607 | 1240 | 1425   | 1520  | 1730   | 2300 | NA          |
| 108 | Hemopexin (v121) [ug/mL]  | 0.411748814 | SSC-PAH    | 1481.681818 | 212.8991235 | 827  | 1430   | 1485  | 1635   | 1800 | 0.301880418 |
| 109 | Decorin (v072) [ng/mL]    | 0.406052252 | All        | 2.122727273 | 1.003218921 | 1    | 1.5    | 1.9   | 2.2    | 5.4  | NA          |
| 110 | Decorin (v072) [ng/mL]    | 0.406052252 | SSC-no PAH | 1.754545455 | 0.438316338 | 1    | 1.425  | 1.8   | 2.1    | 2.7  | NA          |
| 111 | Decorin (v072) [ng/mL]    | 0.406052252 | SSC-PAH    | 2.490909091 | 1.25883888  | 1.2  | 1.6    | 2     | 2.65   | 5.4  | 0.0551182   |
| 112 | Omentin (v218) [ng/mL]    | 0.400778844 | All        | 171.6818182 | 68.98660899 | 65   | 112.5  | 164   | 217.25 | 404  | NA          |
| 113 | Omentin (v218) [ng/mL]    | 0.400778844 | SSC-no PAH | 151.8181818 | 62.73347733 | 65   | 94.25  | 147.5 | 209    | 246  | NA          |
| 114 | Omentin (v218) [ng/mL]    | 0.400778844 | SSC-PAH    | 191.5454545 | 70.58849716 | 85   | 146    | 189.5 | 228.25 | 404  | 0.081280202 |
| 115 | Periostin (v230) [ng/mL]  | 0.398764835 | All        | 249.5       | 203.5320099 | 81   | 145    | 190.5 | 289.75 | 1130 | NA          |
| 116 | Periostin (v230) [ng/mL]  | 0.398764835 | SSC-no PAH | 243         | 219.4987797 | 81   | 125.5  | 182   | 287.25 | 1130 | NA          |
| 117 | Periostin (v230) [ng/mL]  | 0.398764835 | SSC-PAH    | 256         | 191.1934946 | 92   | 151    | 191.5 | 291.25 | 932  | 0.452852906 |
| 118 | C-Peptide (v036) [ng/mL]  | 0.396193388 | All        | 4.884318182 | 2.810144743 | 0.31 | 2.5    | 4.95  | 6.575  | 11   | NA          |
| 119 | C-Peptide (v036) [ng/mL]  | 0.396193388 | SSC-no PAH | 5.109090909 | 2.919541564 | 1.3  | 2.3    | 5.2   | 6.8    | 11   | NA          |
| 120 | C-Peptide (v036) [ng/mL]  | 0.396193388 | SSC-PAH    | 4.659545455 | 2.745958896 | 0.31 | 2.625  | 4.7   | 5.8    | 11   | 0.572653915 |
| 121 | MMP-7 (v197) [ng/mL]      | 0.392965884 | All        | 7.186363636 | 4.07057455  | 2.6  | 4.975  | 5.95  | 7.95   | 23   | NA          |
| 122 | MMP-7 (v197) [ng/mL]      | 0.392965884 | SSC-no PAH | 7.427272727 | 4.67793013  | 2.7  | 5      | 5.9   | 9.2    | 23   | NA          |
| 123 | MMP-7 (v197) [ng/mL]      | 0.392965884 | SSC-PAH    | 6.945454545 | 3.453049346 | 2.6  | 4.95   | 5.95  | 7.45   | 18   | 0.949031252 |
| 124 | SHBG (v257) [nmol/L]      | 0.380477645 | All        | 75.52272727 | 28.81737899 | 29   | 53.25  | 71.5  | 94.5   | 144  | NA          |
| 125 | SHBG (v257) [nmol/L]      | 0.380477645 | SSC-no PAH | 70.68181818 | 32.39839262 | 29   | 49.25  | 57.5  | 88.5   | 144  | NA          |
| 126 | SHBG (v257) [nmol/L]      | 0.380477645 | SSC-PAH    | 80.36363636 | 24.52898277 | 41   | 63.25  | 81.5  | 95.5   | 121  | 0.158594133 |
| 127 | E-Selectin (v075) [ng/mL] | 0.377794497 | All        | 13.05       | 7.655595309 | 3.1  | 7.2    | 11    | 15.25  | 35   | NA          |
| 128 | E-Selectin (v075) [ng/mL] | 0.377794497 | SSC-no PAH | 10.52272727 | 5.185688347 | 3.1  | 6.775  | 9.7   | 13     | 24   | NA          |

|     |                                |             |            |             |             |      |        |       |        |       |             |
|-----|--------------------------------|-------------|------------|-------------|-------------|------|--------|-------|--------|-------|-------------|
| 129 | E-Selectin (v075) [ng/mL]      | 0.377794497 | SSC-PAH    | 15.57727273 | 8.929348711 | 3.8  | 9.4    | 14    | 18.75  | 35    | 0.036152627 |
| 130 | PRL (v241) [ng/mL]             | 0.373953073 | All        | 8.375       | 7.069624673 | 2.2  | 4.05   | 6.1   | 8.825  | 32    | NA          |
| 131 | PRL (v241) [ng/mL]             | 0.373953073 | SSC-no PAH | 9.563636364 | 7.688057867 | 2.7  | 4.325  | 7.5   | 9.25   | 31    | NA          |
| 132 | PRL (v241) [ng/mL]             | 0.373953073 | SSC-PAH    | 7.186363636 | 6.346074561 | 2.2  | 3.9    | 5.65  | 8.15   | 32    | 0.236085217 |
| 133 | TIMP-3 (v282) [ng/mL]          | 0.371447357 | All        | 25.10454545 | 18.10163753 | 3.2  | 13     | 18.5  | 31.5   | 93    | NA          |
| 134 | TIMP-3 (v282) [ng/mL]          | 0.371447357 | SSC-no PAH | 27.44545455 | 23.02219896 | 3.2  | 13     | 15.5  | 41     | 93    | NA          |
| 135 | TIMP-3 (v282) [ng/mL]          | 0.371447357 | SSC-PAH    | 22.76363636 | 11.37710924 | 6.8  | 14.25  | 20.5  | 29.75  | 51    | 0.893497158 |
| 136 | ICAM-1 (v139) [ng/mL]          | 0.368629081 | All        | 190.4772727 | 91.38940161 | 78   | 134.5  | 157.5 | 216.75 | 535   | NA          |
| 137 | ICAM-1 (v139) [ng/mL]          | 0.368629081 | SSC-no PAH | 152.8181818 | 52.43738794 | 78   | 122    | 142.5 | 175.25 | 264   | NA          |
| 138 | ICAM-1 (v139) [ng/mL]          | 0.368629081 | SSC-PAH    | 228.1363636 | 106.679893  | 105  | 154.25 | 198.5 | 249.25 | 535   | 0.004904255 |
| 139 | MPIF-1 (v208) [ng/mL]          | 0.365786934 | All        | 1.337954545 | 0.554355186 | 0.31 | 0.9975 | 1.25  | 1.7    | 3.2   | NA          |
| 140 | MPIF-1 (v208) [ng/mL]          | 0.365786934 | SSC-no PAH | 1.187272727 | 0.456072068 | 0.31 | 0.9075 | 1.15  | 1.4    | 2.4   | NA          |
| 141 | MPIF-1 (v208) [ng/mL]          | 0.365786934 | SSC-PAH    | 1.488636364 | 0.611292896 | 0.56 | 1.125  | 1.3   | 1.8    | 3.2   | 0.103586619 |
| 142 | CD163 (v056) [ng/mL]           | 0.365461524 | All        | 412.8181818 | 205.1675745 | 132  | 291    | 353.5 | 484.25 | 1110  | NA          |
| 143 | CD163 (v056) [ng/mL]           | 0.365461524 | SSC-no PAH | 349.1363636 | 151.7737337 | 132  | 258.75 | 328   | 399.25 | 701   | NA          |
| 144 | CD163 (v056) [ng/mL]           | 0.365461524 | SSC-PAH    | 476.5       | 233.7941198 | 219  | 338.75 | 393.5 | 523.75 | 1110  | 0.027585154 |
| 145 | Visfatin (v308) [ng/mL]        | 0.364529735 | All        | 3.0925      | 3.173727267 | 0.3  | 1.175  | 2.05  | 3.75   | 17    | NA          |
| 146 | Visfatin (v308) [ng/mL]        | 0.364529735 | SSC-no PAH | 2.34        | 1.281178773 | 0.86 | 1.6    | 1.9   | 3      | 5.4   | NA          |
| 147 | Visfatin (v308) [ng/mL]        | 0.364529735 | SSC-PAH    | 3.845       | 4.218634117 | 0.3  | 0.875  | 2.35  | 4.875  | 17    | 0.893626429 |
| 148 | PEDF (v232) [ng/mL]            | 0.362871177 | All        | 6466.363636 | 1667.992932 | 2920 | 5635   | 6195  | 7470   | 10900 | NA          |
| 149 | PEDF (v232) [ng/mL]            | 0.362871177 | SSC-no PAH | 6623.636364 | 1661.022478 | 4180 | 5625   | 6305  | 7377.5 | 10900 | NA          |
| 150 | PEDF (v232) [ng/mL]            | 0.362871177 | SSC-PAH    | 6309.090909 | 1698.842489 | 2920 | 5660   | 6060  | 7657.5 | 10200 | 0.802763876 |
| 151 | MMP-10 (v200) [ng/mL]          | 0.362828313 | All        | 1.633409091 | 0.813201949 | 0.43 | 1.1    | 1.45  | 2      | 3.8   | NA          |
| 152 | MMP-10 (v200) [ng/mL]          | 0.362828313 | SSC-no PAH | 1.724090909 | 0.943527621 | 0.43 | 0.92   | 1.8   | 2.075  | 3.8   | NA          |
| 153 | MMP-10 (v200) [ng/mL]          | 0.362828313 | SSC-PAH    | 1.542727273 | 0.668289799 | 0.81 | 1.1    | 1.3   | 1.75   | 3.3   | 0.603910223 |
| 154 | FABP, adipocyte (v090) [ng/mL] | 0.362622315 | All        | 27.14318182 | 13.8204331  | 7.3  | 20     | 25    | 31     | 81    | NA          |
| 155 | FABP, adipocyte (v090) [ng/mL] | 0.362622315 | SSC-no PAH | 27.15       | 17.70740362 | 7.3  | 17.75  | 24    | 29.75  | 81    | NA          |
| 156 | FABP, adipocyte (v090) [ng/mL] | 0.362622315 | SSC-PAH    | 27.13636364 | 8.806358388 | 12   | 20.25  | 27.5  | 31     | 44    | 0.312829168 |
| 157 | PSAT (v231) [ng/mL]            | 0.357225948 | All        | 4.247727273 | 3.342084619 | 1.2  | 2.575  | 3.1   | 4.95   | 21    | NA          |
| 158 | PSAT (v231) [ng/mL]            | 0.357225948 | SSC-no PAH | 4.713636364 | 4.351277366 | 1.2  | 2.6    | 3.2   | 5.375  | 21    | NA          |
| 159 | PSAT (v231) [ng/mL]            | 0.357225948 | SSC-PAH    | 3.781818182 | 1.86614866  | 1.4  | 2.525  | 3.1   | 4.8    | 7.8   | 0.820666476 |
| 160 | G-CSF (v113) [pg/mL]           | 0.355006133 | All        | 18.68181818 | 3.283310349 | 17   | 17     | 17    | 20     | 32    | NA          |
| 161 | G-CSF (v113) [pg/mL]           | 0.355006133 | SSC-no PAH | 19.22727273 | 3.766162859 | 17   | 17     | 17    | 20     | 32    | NA          |

|     |                                    |             |            |             |             |      |        |       |        |       |             |
|-----|------------------------------------|-------------|------------|-------------|-------------|------|--------|-------|--------|-------|-------------|
| 162 | G-CSF (v113) [pg/mL]               | 0.355006133 | SSC-PAH    | 18.13636364 | 2.695595253 | 17   | 17     | 17    | 17     | 27    | 0.169643563 |
| 163 | Myoglobin (v210) [ng/mL]           | 0.352062832 | All        | 34.38409091 | 18.85644598 | 9.9  | 20.5   | 31    | 40.75  | 103   | NA          |
| 164 | Myoglobin (v210) [ng/mL]           | 0.352062832 | SSC-no PAH | 29.63181818 | 15.14537133 | 9.9  | 16.25  | 31.5  | 37.75  | 63    | NA          |
| 165 | Myoglobin (v210) [ng/mL]           | 0.352062832 | SSC-PAH    | 39.13636364 | 21.2452694  | 17   | 27     | 30    | 44.75  | 103   | 0.120451601 |
| 166 | MCP-1 (v203) [pg/mL]               | 0.351111747 | All        | 386.1818182 | 280.8380542 | 112  | 256    | 300   | 457.25 | 1880  | NA          |
| 167 | MCP-1 (v203) [pg/mL]               | 0.351111747 | SSC-no PAH | 401.4090909 | 361.1068512 | 112  | 259.5  | 283   | 428.25 | 1880  | NA          |
| 168 | MCP-1 (v203) [pg/mL]               | 0.351111747 | SSC-PAH    | 370.9545455 | 174.9621666 | 141  | 252.25 | 321.5 | 461.75 | 749   | 0.758075204 |
| 169 | PDGF-BB (v236) [pg/mL]             | 0.348525552 | All        | 8545.909091 | 2985.866177 | 1350 | 7392.5 | 8555  | 9865   | 16600 | NA          |
| 170 | PDGF-BB (v236) [pg/mL]             | 0.348525552 | SSC-no PAH | 8850.909091 | 3439.801917 | 1350 | 7237.5 | 8175  | 10735  | 16600 | NA          |
| 171 | PDGF-BB (v236) [pg/mL]             | 0.348525552 | SSC-PAH    | 8240.909091 | 2495.63411  | 2530 | 7505   | 8670  | 9807.5 | 13800 | 0.893529693 |
| 172 | FAS (v089) [ng/mL]                 | 0.343543164 | All        | 26.04090909 | 12.22116575 | 5.8  | 19     | 24    | 32     | 64    | NA          |
| 173 | FAS (v089) [ng/mL]                 | 0.343543164 | SSC-no PAH | 22.68636364 | 10.17505331 | 5.8  | 18.25  | 21.5  | 24     | 48    | NA          |
| 174 | FAS (v089) [ng/mL]                 | 0.343543164 | SSC-PAH    | 29.39545455 | 13.36849449 | 9.7  | 20.25  | 25.5  | 37     | 64    | 0.07865588  |
| 175 | LCN1 (v181) [ng/mL]                | 0.341033243 | All        | 1.47        | 1.01445827  | 0.34 | 0.785  | 1.2   | 1.825  | 5     | NA          |
| 176 | LCN1 (v181) [ng/mL]                | 0.341033243 | SSC-no PAH | 1.509545455 | 0.940108794 | 0.34 | 0.885  | 1.35  | 1.975  | 4.1   | NA          |
| 177 | LCN1 (v181) [ng/mL]                | 0.341033243 | SSC-PAH    | 1.430454545 | 1.104615759 | 0.4  | 0.775  | 1.15  | 1.55   | 5     | 0.510840172 |
| 178 | LTF (v174) [ng/mL]                 | 0.34058637  | All        | 106.6363636 | 53.94833485 | 31   | 68.75  | 100   | 121    | 349   | NA          |
| 179 | LTF (v174) [ng/mL]                 | 0.34058637  | SSC-no PAH | 104.6363636 | 62.18447629 | 31   | 64.25  | 103   | 114.5  | 349   | NA          |
| 180 | LTF (v174) [ng/mL]                 | 0.34058637  | SSC-PAH    | 108.6363636 | 45.6524609  | 51   | 71.25  | 99.5  | 145    | 221   | 0.556868322 |
| 181 | PON-1 (v225) [ng/mL]               | 0.33790687  | All        | 1821.840909 | 540.1473504 | 478  | 1437.5 | 1870  | 2170   | 2920  | NA          |
| 182 | PON-1 (v225) [ng/mL]               | 0.33790687  | SSC-no PAH | 1953.409091 | 493.2095719 | 705  | 1785   | 2010  | 2197.5 | 2920  | NA          |
| 183 | PON-1 (v225) [ng/mL]               | 0.33790687  | SSC-PAH    | 1690.272727 | 563.814659  | 478  | 1340   | 1660  | 1962.5 | 2860  | 0.062386406 |
| 184 | TM (v272) [ng/mL]                  | 0.335894763 | All        | 4.422727273 | 1.277145006 | 1.6  | 3.575  | 4.3   | 5.075  | 7.9   | NA          |
| 185 | TM (v272) [ng/mL]                  | 0.335894763 | SSC-no PAH | 4.304545455 | 1.500310213 | 1.6  | 3.325  | 4.1   | 5.25   | 7.9   | NA          |
| 186 | TM (v272) [ng/mL]                  | 0.335894763 | SSC-PAH    | 4.540909091 | 1.029405326 | 3.2  | 3.7    | 4.35  | 4.925  | 6.6   | 0.404847851 |
| 187 | IL-2 receptor alpha (v150) [pg/mL] | 0.33416325  | All        | 3222.045455 | 1552.00932  | 1300 | 2182.5 | 2760  | 3825   | 8380  | NA          |
| 188 | IL-2 receptor alpha (v150) [pg/mL] | 0.33416325  | SSC-no PAH | 2723.181818 | 1006.854538 | 1430 | 2125   | 2370  | 3107.5 | 5790  | NA          |
| 189 | IL-2 receptor alpha (v150) [pg/mL] | 0.33416325  | SSC-PAH    | 3720.909091 | 1843.089821 | 1300 | 2595   | 3030  | 4540   | 8380  | 0.030253505 |
| 190 | ANG-1 (v013) [ng/mL]               | 0.333016196 | All        | 30.68181818 | 8.899366916 | 15   | 25.5   | 29    | 37.25  | 53    | NA          |
| 191 | ANG-1 (v013) [ng/mL]               | 0.333016196 | SSC-no PAH | 32.04545455 | 9.853581765 | 18   | 23     | 30.5  | 37.75  | 53    | NA          |
| 192 | ANG-1 (v013) [ng/mL]               | 0.333016196 | SSC-PAH    | 29.31818182 | 7.821742369 | 15   | 26     | 29    | 30.75  | 45    | 0.645502652 |
| 193 | Apo C-III (v025) [ug/mL]           | 0.332552565 | All        | 227.75      | 123.6695005 | 47   | 129.75 | 204   | 312    | 525   | NA          |
| 194 | Apo C-III (v025) [ug/mL]           | 0.332552565 | SSC-no PAH | 274.7272727 | 134.3468084 | 47   | 163.25 | 279   | 372.5  | 525   | NA          |

|     |                           |             |            |             |             |      |        |       |        |      |             |
|-----|---------------------------|-------------|------------|-------------|-------------|------|--------|-------|--------|------|-------------|
| 195 | Apo C-III (v025) [ug/mL]  | 0.332552565 | SSC-PAH    | 180.7727273 | 92.97103073 | 58   | 108.5  | 175.5 | 220    | 383  | 0.016387885 |
| 196 | uPA (v297) [pg/mL]        | 0.330892093 | All        | 515.4545455 | 292.7850592 | 145  | 316    | 456   | 613.75 | 1590 | NA          |
| 197 | uPA (v297) [pg/mL]        | 0.330892093 | SSC-no PAH | 448         | 306.628362  | 145  | 292    | 363   | 586.25 | 1590 | NA          |
| 198 | uPA (v297) [pg/mL]        | 0.330892093 | SSC-PAH    | 582.9090909 | 268.2791562 | 237  | 395.5  | 496.5 | 796    | 1150 | 0.043185073 |
| 199 | TNF RI (v293) [pg/mL]     | 0.330183728 | All        | 2162.409091 | 1205.48663  | 715  | 1392.5 | 2095  | 2480   | 7170 | NA          |
| 200 | TNF RI (v293) [pg/mL]     | 0.330183728 | SSC-no PAH | 1986.227273 | 1325.96229  | 715  | 1255   | 1660  | 2285   | 7170 | NA          |
| 201 | TNF RI (v293) [pg/mL]     | 0.330183728 | SSC-PAH    | 2338.590909 | 1073.491352 | 839  | 1692.5 | 2415  | 2617.5 | 6200 | 0.058261761 |
| 202 | Cystatin-B (v070) [ng/mL] | 0.32978462  | All        | 15.47727273 | 8.689310825 | 4.8  | 9.575  | 13    | 18.25  | 46   | NA          |
| 203 | Cystatin-B (v070) [ng/mL] | 0.32978462  | SSC-no PAH | 13.17727273 | 7.049480347 | 4.8  | 8.325  | 10.5  | 16.75  | 35   | NA          |
| 204 | Cystatin-B (v070) [ng/mL] | 0.32978462  | SSC-PAH    | 17.77727273 | 9.686314932 | 7.4  | 11.25  | 15.5  | 19.75  | 46   | 0.049727218 |
| 205 | OPG (v221) [pM]           | 0.329515912 | All        | 6.454545455 | 2.158752282 | 2.3  | 5      | 6.4   | 7.725  | 13   | NA          |
| 206 | OPG (v221) [pM]           | 0.329515912 | SSC-no PAH | 5.827272727 | 1.613686055 | 3.4  | 4.675  | 5.5   | 7.275  | 8.7  | NA          |
| 207 | OPG (v221) [pM]           | 0.329515912 | SSC-PAH    | 7.081818182 | 2.472638145 | 2.3  | 5.425  | 6.85  | 8.525  | 13   | 0.06579136  |
| 208 | Apo D (v026) [ug/mL]      | 0.328050168 | All        | 131.4772727 | 52.95917192 | 39   | 84.5   | 135   | 163.75 | 252  | NA          |
| 209 | Apo D (v026) [ug/mL]      | 0.328050168 | SSC-no PAH | 132.4545455 | 57.081168   | 61   | 87.5   | 123   | 174.75 | 252  | NA          |
| 210 | Apo D (v026) [ug/mL]      | 0.328050168 | SSC-PAH    | 130.5       | 49.82612625 | 39   | 80     | 145   | 159.75 | 222  | 0.939805354 |
| 211 | FGF-21 (v097) [ng/mL]     | 0.324300271 | All        | 0.550227273 | 1.088298199 | 0.1  | 0.17   | 0.285 | 0.4975 | 7.2  | NA          |
| 212 | FGF-21 (v097) [ng/mL]     | 0.324300271 | SSC-no PAH | 0.397272727 | 0.412808982 | 0.1  | 0.17   | 0.245 | 0.4925 | 1.9  | NA          |
| 213 | FGF-21 (v097) [ng/mL]     | 0.324300271 | SSC-PAH    | 0.703181818 | 1.485178798 | 0.1  | 0.21   | 0.31  | 0.4825 | 7.2  | 0.556641643 |
| 214 | EGF (v082) [pg/mL]        | 0.322094874 | All        | 211.75      | 136.6899607 | 18   | 120    | 184   | 267.5  | 642  | NA          |
| 215 | EGF (v082) [pg/mL]        | 0.322094874 | SSC-no PAH | 213.7727273 | 94.58527612 | 42   | 144    | 212   | 266.5  | 398  | NA          |
| 216 | EGF (v082) [pg/mL]        | 0.322094874 | SSC-PAH    | 209.7272727 | 171.1813802 | 18   | 93.25  | 143.5 | 281.75 | 642  | 0.307678577 |
| 217 | uPAR (v298) [ng/mL]       | 0.321797619 | All        | 12.45227273 | 5.151269369 | 3.2  | 8.65   | 12    | 15     | 30   | NA          |
| 218 | uPAR (v298) [ng/mL]       | 0.321797619 | SSC-no PAH | 10.91363636 | 4.034647026 | 3.2  | 8.475  | 10.5  | 12.75  | 20   | NA          |
| 219 | uPAR (v298) [ng/mL]       | 0.321797619 | SSC-PAH    | 13.99090909 | 5.752921336 | 5.6  | 9.275  | 14    | 16     | 30   | 0.063501914 |
| 220 | VDBP (v309) [ug/mL]       | 0.320410707 | All        | 251.6363636 | 99.20406286 | 92   | 161    | 257.5 | 307.5  | 532  | NA          |
| 221 | VDBP (v309) [ug/mL]       | 0.320410707 | SSC-no PAH | 249.5909091 | 114.1480489 | 92   | 159    | 255   | 299.75 | 532  | NA          |
| 222 | VDBP (v309) [ug/mL]       | 0.320410707 | SSC-PAH    | 253.6818182 | 84.3385391  | 95   | 207    | 262.5 | 319.75 | 364  | 0.758138005 |
| 223 | CA-15-3 (v042) [U/mL]     | 0.31747424  | All        | 4.122272727 | 3.040159775 | 0.78 | 1.8    | 3.8   | 5.15   | 15   | NA          |
| 224 | CA-15-3 (v042) [U/mL]     | 0.31747424  | SSC-no PAH | 4.226363636 | 2.710307565 | 0.78 | 2.825  | 3.9   | 5.1    | 14   | NA          |
| 225 | CA-15-3 (v042) [U/mL]     | 0.31747424  | SSC-PAH    | 4.018181818 | 3.39952887  | 0.8  | 1.7    | 3     | 5.175  | 15   | 0.503379091 |
| 226 | FSH (v102) [mIU/mL]       | 0.316497824 | All        | 48.1        | 30.14873209 | 2.7  | 18.5   | 53.5  | 70.5   | 110  | NA          |
| 227 | FSH (v102) [mIU/mL]       | 0.316497824 | SSC-no PAH | 57.2        | 24.78104114 | 2.7  | 47     | 58.5  | 71.5   | 102  | NA          |

|     |                                          |             |            |             |             |     |        |       |        |      |             |
|-----|------------------------------------------|-------------|------------|-------------|-------------|-----|--------|-------|--------|------|-------------|
| 228 | FSH (v102) [mIU/mL]                      | 0.316497824 | SSC-PAH    | 39          | 32.76535627 | 3.8 | 8.775  | 36    | 62.5   | 110  | 0.040787955 |
| 229 | Hepsin (v125) [pg/mL]                    | 0.316155547 | All        | 1048.636364 | 367.6576448 | 540 | 788    | 991.5 | 1252.5 | 2490 | NA          |
| 230 | Hepsin (v125) [pg/mL]                    | 0.316155547 | SSC-no PAH | 1005.863636 | 381.7486452 | 607 | 817.25 | 867   | 1035   | 2490 | NA          |
| 231 | Hepsin (v125) [pg/mL]                    | 0.316155547 | SSC-PAH    | 1091.409091 | 356.6732077 | 540 | 774.75 | 1130  | 1300   | 2060 | 0.275367173 |
| 232 | EPR (v084) [pg/mL]                       | 0.312963834 | All        | 15          | 0           | 15  | 15     | 15    | 15     | 15   | NA          |
| 233 | EPR (v084) [pg/mL]                       | 0.312963834 | SSC-no PAH | 15          | 0           | 15  | 15     | 15    | 15     | 15   | NA          |
| 234 | EPR (v084) [pg/mL]                       | 0.312963834 | SSC-PAH    | 15          | 0           | 15  | 15     | 15    | 15     | 15   | NA          |
| 235 | GRO-alpha (v117) [pg/mL]                 | 0.311035046 | All        | 159.4318182 | 97.91367763 | 47  | 99.25  | 132   | 181.75 | 535  | NA          |
| 236 | GRO-alpha (v117) [pg/mL]                 | 0.311035046 | SSC-no PAH | 169.4090909 | 97.92643453 | 47  | 96     | 145   | 240.25 | 417  | NA          |
| 237 | GRO-alpha (v117) [pg/mL]                 | 0.311035046 | SSC-PAH    | 149.4545455 | 99.15919249 | 68  | 102    | 127   | 162.5  | 535  | 0.53375253  |
| 238 | TNFR2 (v294) [ng/mL]                     | 0.310410811 | All        | 9.534090909 | 3.881257479 | 4.4 | 6.975  | 8.45  | 12     | 19   | NA          |
| 239 | TNFR2 (v294) [ng/mL]                     | 0.310410811 | SSC-no PAH | 8.186363636 | 2.913563594 | 4.4 | 5.9    | 7.8   | 9.375  | 15   | NA          |
| 240 | TNFR2 (v294) [ng/mL]                     | 0.310410811 | SSC-PAH    | 10.88181818 | 4.307096731 | 4.4 | 7.775  | 9.85  | 13.5   | 19   | 0.030188654 |
| 241 | ACE (v016) [ng/mL]                       | 0.308095205 | All        | 113.5454545 | 62.39389302 | 39  | 70     | 97.5  | 140    | 287  | NA          |
| 242 | ACE (v016) [ng/mL]                       | 0.308095205 | SSC-no PAH | 97.86363636 | 47.90396688 | 43  | 64.75  | 84.5  | 134.5  | 192  | NA          |
| 243 | ACE (v016) [ng/mL]                       | 0.308095205 | SSC-PAH    | 129.2272727 | 71.84237496 | 39  | 83.5   | 112   | 148.25 | 287  | 0.145119435 |
| 244 | Fib-1C (v100) [ug/mL]                    | 0.305748703 | All        | 28.36363636 | 10.72942251 | 13  | 20     | 27.5  | 37     | 53   | NA          |
| 245 | Fib-1C (v100) [ug/mL]                    | 0.305748703 | SSC-no PAH | 24.77272727 | 10.02820697 | 13  | 16     | 24    | 30.5   | 48   | NA          |
| 246 | Fib-1C (v100) [ug/mL]                    | 0.305748703 | SSC-PAH    | 31.95454545 | 10.39907172 | 18  | 26     | 29.5  | 38     | 53   | 0.021249182 |
| 247 | Angiogenin (v012) [ng/mL]                | 0.304704396 | All        | 541.3636364 | 206.8861153 | 241 | 389.25 | 492   | 669    | 1120 | NA          |
| 248 | Angiogenin (v012) [ng/mL]                | 0.304704396 | SSC-no PAH | 551.7272727 | 249.8502755 | 241 | 382.25 | 438.5 | 682    | 1120 | NA          |
| 249 | Angiogenin (v012) [ng/mL]                | 0.304704396 | SSC-PAH    | 531         | 158.0876791 | 246 | 420.5  | 514   | 646.25 | 798  | 0.633656227 |
| 250 | Apolipoprotein(a) (Lp(a)) (v019) [ug/mL] | 0.302130435 | All        | 296.9568182 | 311.0127175 | 5.1 | 59     | 165.5 | 378.25 | 1130 | NA          |
| 251 | Apolipoprotein(a) (Lp(a)) (v019) [ug/mL] | 0.302130435 | SSC-no PAH | 333.8590909 | 344.4599481 | 5.4 | 42.5   | 219   | 643.25 | 1010 | NA          |
| 252 | Apolipoprotein(a) (Lp(a)) (v019) [ug/mL] | 0.302130435 | SSC-PAH    | 260.0545455 | 276.6912629 | 5.1 | 84.75  | 165.5 | 323    | 1130 | 0.875391765 |
| 253 | GPBB (v112) [ng/mL]                      | 0.299302711 | All        | 35          | 0           | 35  | 35     | 35    | 35     | 35   | NA          |
| 254 | GPBB (v112) [ng/mL]                      | 0.299302711 | SSC-no PAH | 35          | 0           | 35  | 35     | 35    | 35     | 35   | NA          |
| 255 | GPBB (v112) [ng/mL]                      | 0.299302711 | SSC-PAH    | 35          | 0           | 35  | 35     | 35    | 35     | 35   | NA          |
| 256 | Sortilin (v258) [ng/mL]                  | 0.299061506 | All        | 8.340909091 | 3.058143393 | 3.7 | 6.475  | 7.45  | 9.825  | 19   | NA          |
| 257 | Sortilin (v258) [ng/mL]                  | 0.299061506 | SSC-no PAH | 7.213636364 | 2.229733158 | 3.7 | 5.6    | 7.1   | 8.575  | 13   | NA          |
| 258 | Sortilin (v258) [ng/mL]                  | 0.299061506 | SSC-PAH    | 9.468181818 | 3.3934652   | 5.6 | 6.65   | 8.6   | 12     | 19   | 0.033041449 |
| 259 | AT-III (v018) [ug/mL]                    | 0.296380958 | All        | 280.8409091 | 36.70684822 | 177 | 267.75 | 281   | 306    | 352  | NA          |
| 260 | AT-III (v018) [ug/mL]                    | 0.296380958 | SSC-no PAH | 286.6818182 | 36.60261032 | 201 | 270.25 | 287.5 | 308    | 352  | NA          |

|     |                          |             |            |             |             |      |        |       |        |      |             |
|-----|--------------------------|-------------|------------|-------------|-------------|------|--------|-------|--------|------|-------------|
| 261 | AT-III (v018) [ug/mL]    | 0.296380958 | SSC-PAH    | 275         | 36.71122833 | 177  | 265.25 | 275.5 | 294    | 336  | 0.285903355 |
| 262 | YKL-40 (v313) [ng/mL]    | 0.295352038 | All        | 75.36363636 | 86.3201426  | 9    | 29     | 52.5  | 88.25  | 443  | NA          |
| 263 | YKL-40 (v313) [ng/mL]    | 0.295352038 | SSC-no PAH | 62.13636364 | 82.83850925 | 9    | 27.5   | 37    | 68.25  | 411  | NA          |
| 264 | YKL-40 (v313) [ng/mL]    | 0.295352038 | SSC-PAH    | 88.59090909 | 89.60105181 | 19   | 35.75  | 63.5  | 95.75  | 443  | 0.077176799 |
| 265 | CA-19-9 (v043) [U/mL]    | 0.291884526 | All        | 9.190909091 | 8.701799284 | 3.6  | 3.6    | 5.25  | 10.1   | 37   | NA          |
| 266 | CA-19-9 (v043) [U/mL]    | 0.291884526 | SSC-no PAH | 8.418181818 | 8.431665732 | 3.6  | 3.6    | 4.85  | 7.025  | 31   | NA          |
| 267 | CA-19-9 (v043) [U/mL]    | 0.291884526 | SSC-PAH    | 9.963636364 | 9.094192048 | 3.6  | 3.6    | 5.6   | 14     | 37   | 0.455381533 |
| 268 | IgM (v130) [mg/mL]       | 0.291732821 | All        | 2.350681818 | 1.982873646 | 0.28 | 1.075  | 1.6   | 2.475  | 8.1  | NA          |
| 269 | IgM (v130) [mg/mL]       | 0.291732821 | SSC-no PAH | 2.115454545 | 1.6302957   | 0.28 | 1.15   | 1.55  | 2.1    | 6.2  | NA          |
| 270 | IgM (v130) [mg/mL]       | 0.291732821 | SSC-PAH    | 2.585909091 | 2.297173541 | 0.34 | 0.8775 | 1.85  | 3.675  | 8.1  | 0.884471744 |
| 271 | CFHR1 (v066) [ug/mL]     | 0.290008738 | All        | 3001.125    | 1346.37991  | 6.5  | 1950   | 3420  | 4012.5 | 4850 | NA          |
| 272 | CFHR1 (v066) [ug/mL]     | 0.290008738 | SSC-no PAH | 3234.840909 | 1241.088936 | 6.5  | 2280   | 3705  | 4102.5 | 4850 | NA          |
| 273 | CFHR1 (v066) [ug/mL]     | 0.290008738 | SSC-PAH    | 2767.409091 | 1434.241409 | 6.5  | 1732.5 | 3115  | 3895   | 4840 | 0.236067635 |
| 274 | BLC (v031) [pg/mL]       | 0.289813475 | All        | 126.0454545 | 124.8137132 | 54   | 64     | 78    | 124.5  | 649  | NA          |
| 275 | BLC (v031) [pg/mL]       | 0.289813475 | SSC-no PAH | 118.5909091 | 114.8467547 | 54   | 64.25  | 78    | 100.75 | 554  | NA          |
| 276 | BLC (v031) [pg/mL]       | 0.289813475 | SSC-PAH    | 133.5       | 136.3544925 | 54   | 64     | 90.5  | 127.5  | 649  | 0.602156743 |
| 277 | CD40-L (v055) [ng/mL]    | 0.287983941 | All        | 1.653863636 | 1.223236682 | 0.09 | 0.6625 | 1.55  | 2.25   | 5.2  | NA          |
| 278 | CD40-L (v055) [ng/mL]    | 0.287983941 | SSC-no PAH | 1.544545455 | 0.826113836 | 0.09 | 0.9325 | 1.7   | 2.15   | 3.5  | NA          |
| 279 | CD40-L (v055) [ng/mL]    | 0.287983941 | SSC-PAH    | 1.763181818 | 1.535045792 | 0.09 | 0.475  | 1.3   | 2.65   | 5.2  | 0.884456078 |
| 280 | AGP-1 (v005) [ug/mL]     | 0.287875493 | All        | 730.6136364 | 228.2318503 | 236  | 555    | 710.5 | 909.25 | 1310 | NA          |
| 281 | AGP-1 (v005) [ug/mL]     | 0.287875493 | SSC-no PAH | 748         | 212.1205857 | 363  | 625    | 710.5 | 888    | 1310 | NA          |
| 282 | AGP-1 (v005) [ug/mL]     | 0.287875493 | SSC-PAH    | 713.2272727 | 247.0455774 | 236  | 545    | 693   | 930    | 1130 | 0.646102175 |
| 283 | NGAL (v217) [ng/mL]      | 0.286349187 | All        | 451.5454545 | 197.5898329 | 198  | 319    | 382   | 524    | 1050 | NA          |
| 284 | NGAL (v217) [ng/mL]      | 0.286349187 | SSC-no PAH | 382.4545455 | 128.6204188 | 257  | 298    | 344.5 | 433.25 | 801  | NA          |
| 285 | NGAL (v217) [ng/mL]      | 0.286349187 | SSC-PAH    | 520.6363636 | 231.0793608 | 198  | 372.75 | 480   | 587    | 1050 | 0.015319744 |
| 286 | PSP94 (v033) [ng/mL]     | 0.285557001 | All        | 22.64318182 | 17.30822358 | 2.1  | 12     | 18.5  | 29     | 74   | NA          |
| 287 | PSP94 (v033) [ng/mL]     | 0.285557001 | SSC-no PAH | 16.39545455 | 9.635078633 | 2.1  | 12     | 15    | 20     | 39   | NA          |
| 288 | PSP94 (v033) [ng/mL]     | 0.285557001 | SSC-PAH    | 28.89090909 | 20.94741509 | 3.1  | 13.5   | 22.5  | 44.5   | 74   | 0.048294513 |
| 289 | Eotaxin-1 (v079) [pg/mL] | 0.285341905 | All        | 310.75      | 249.7854079 | 117  | 192    | 279.5 | 335.25 | 1770 | NA          |
| 290 | Eotaxin-1 (v079) [pg/mL] | 0.285341905 | SSC-no PAH | 276.5909091 | 122.4335229 | 117  | 194.75 | 294.5 | 320.25 | 573  | NA          |
| 291 | Eotaxin-1 (v079) [pg/mL] | 0.285341905 | SSC-PAH    | 344.9090909 | 332.1472578 | 117  | 201.75 | 270.5 | 372    | 1770 | 0.793674118 |
| 292 | ErbB3 (v249) [ng/mL]     | 0.284657876 | All        | 0.460454545 | 0.210193206 | 0.18 | 0.3075 | 0.42  | 0.555  | 1.1  | NA          |
| 293 | ErbB3 (v249) [ng/mL]     | 0.284657876 | SSC-no PAH | 0.517272727 | 0.213367151 | 0.27 | 0.3625 | 0.45  | 0.63   | 1.1  | NA          |

|     |                            |             |            |             |             |       |        |       |        |      |             |
|-----|----------------------------|-------------|------------|-------------|-------------|-------|--------|-------|--------|------|-------------|
| 294 | ErbB3 (v249) [ng/mL]       | 0.284657876 | SSC-PAH    | 0.403636364 | 0.195388391 | 0.18  | 0.2825 | 0.34  | 0.48   | 0.92 | 0.031155059 |
| 295 | Fetuin-A (v094) [ug/mL]    | 0.28421789  | All        | 964.0681818 | 198.893497  | 530   | 788.75 | 987   | 1072.5 | 1390 | NA          |
| 296 | Fetuin-A (v094) [ug/mL]    | 0.28421789  | SSC-no PAH | 945.3636364 | 190.9523864 | 674   | 766    | 998   | 1075   | 1330 | NA          |
| 297 | Fetuin-A (v094) [ug/mL]    | 0.28421789  | SSC-PAH    | 982.7727273 | 209.2967663 | 530   | 853    | 961.5 | 1067.5 | 1390 | 0.580686115 |
| 298 | VEGFR-2 (v305) [ng/mL]     | 0.28391363  | All        | 5.334090909 | 1.324710268 | 2.3   | 4.4    | 5.3   | 6.1    | 7.7  | NA          |
| 299 | VEGFR-2 (v305) [ng/mL]     | 0.28391363  | SSC-no PAH | 5.240909091 | 1.31462799  | 2.3   | 4.325  | 5.2   | 6.075  | 7.5  | NA          |
| 300 | VEGFR-2 (v305) [ng/mL]     | 0.28391363  | SSC-PAH    | 5.427272727 | 1.358984852 | 3.1   | 4.575  | 5.5   | 6.1    | 7.7  | 0.572513951 |
| 301 | Haptoglobin (v118) [mg/mL] | 0.283258091 | All        | 2.188227273 | 2.006014409 | 0.016 | 0.895  | 1.9   | 2.825  | 9.5  | NA          |
| 302 | Haptoglobin (v118) [mg/mL] | 0.283258091 | SSC-no PAH | 2.053       | 1.425360071 | 0.076 | 0.8975 | 1.95  | 2.8    | 5.9  | NA          |
| 303 | Haptoglobin (v118) [mg/mL] | 0.283258091 | SSC-PAH    | 2.323454545 | 2.48391735  | 0.016 | 0.925  | 1.65  | 2.8    | 9.5  | 0.740403644 |
| 304 | PAI-1 (v234) [ng/mL]       | 0.283015215 | All        | 248.2954545 | 68.12525384 | 125   | 204    | 234   | 284.75 | 438  | NA          |
| 305 | PAI-1 (v234) [ng/mL]       | 0.283015215 | SSC-no PAH | 251.5       | 68.82396454 | 125   | 213    | 237   | 281.25 | 380  | NA          |
| 306 | PAI-1 (v234) [ng/mL]       | 0.283015215 | SSC-PAH    | 245.0909091 | 68.8828606  | 154   | 202    | 231.5 | 280.75 | 438  | 0.679840157 |
| 307 | TSH (v278) [uIU/mL]        | 0.282907628 | All        | 1.923840909 | 1.244145283 | 0.049 | 0.865  | 1.85  | 2.9    | 5.3  | NA          |
| 308 | TSH (v278) [uIU/mL]        | 0.282907628 | SSC-no PAH | 1.993181818 | 1.399739385 | 0.36  | 0.835  | 1.75  | 3      | 5.3  | NA          |
| 309 | TSH (v278) [uIU/mL]        | 0.282907628 | SSC-PAH    | 1.8545      | 1.095518044 | 0.049 | 0.9975 | 1.9   | 2.575  | 4.2  | 0.986093258 |
| 310 | ENA-78 (v086) [ng/mL]      | 0.279524894 | All        | 2.784090909 | 2.528615135 | 0.58  | 1.475  | 2.3   | 3.275  | 17   | NA          |
| 311 | ENA-78 (v086) [ng/mL]      | 0.279524894 | SSC-no PAH | 3.302272727 | 3.281059544 | 0.85  | 1.825  | 2.6   | 3.5    | 17   | NA          |
| 312 | ENA-78 (v086) [ng/mL]      | 0.279524894 | SSC-PAH    | 2.265909091 | 1.328273706 | 0.58  | 1.3    | 1.95  | 3.05   | 5.5  | 0.155104497 |
| 313 | Endoglin (v077) [ng/mL]    | 0.278277331 | All        | 4.497727273 | 0.895074022 | 3     | 3.775  | 4.4   | 5      | 6.1  | NA          |
| 314 | Endoglin (v077) [ng/mL]    | 0.278277331 | SSC-no PAH | 4.213636364 | 0.748519462 | 3     | 3.625  | 4.3   | 4.675  | 6.1  | NA          |
| 315 | Endoglin (v077) [ng/mL]    | 0.278277331 | SSC-PAH    | 4.781818182 | 0.954506287 | 3.2   | 3.975  | 4.9   | 5.8    | 6.1  | 0.065469257 |
| 316 | RANTES (v264) [ng/mL]      | 0.27770912  | All        | 23.30227273 | 11.59082413 | 6.5   | 13     | 22    | 30.25  | 47   | NA          |
| 317 | RANTES (v264) [ng/mL]      | 0.27770912  | SSC-no PAH | 25.35       | 12.7151859  | 6.5   | 15.5   | 23    | 37.5   | 46   | NA          |
| 318 | RANTES (v264) [ng/mL]      | 0.27770912  | SSC-PAH    | 21.25454545 | 10.22889126 | 8.1   | 12.25  | 17    | 29     | 47   | 0.318382386 |
| 319 | FRTN (v093) [ng/mL]        | 0.276454073 | All        | 105.6136364 | 85.08606202 | 10    | 45.25  | 79.5  | 166.5  | 373  | NA          |
| 320 | FRTN (v093) [ng/mL]        | 0.276454073 | SSC-no PAH | 103         | 94.12909069 | 10    | 31.75  | 75    | 164.5  | 373  | NA          |
| 321 | FRTN (v093) [ng/mL]        | 0.276454073 | SSC-PAH    | 108.2272727 | 77.1324969  | 12    | 62.25  | 83.5  | 161.75 | 312  | 0.496203851 |
| 322 | TN-C (v267) [ng/mL]        | 0.275485934 | All        | 628.0909091 | 348.8744572 | 207   | 351.75 | 556   | 750.5  | 1650 | NA          |
| 323 | TN-C (v267) [ng/mL]        | 0.275485934 | SSC-no PAH | 563.9545455 | 343.6159924 | 207   | 340.75 | 400   | 704.5  | 1360 | NA          |
| 324 | TN-C (v267) [ng/mL]        | 0.275485934 | SSC-PAH    | 692.2272727 | 350.045702  | 275   | 465.25 | 629   | 783.5  | 1650 | 0.109681737 |
| 325 | DPPIV (v074) [ng/mL]       | 0.274311426 | All        | 240.0227273 | 66.93505656 | 137   | 192.75 | 237   | 266    | 521  | NA          |
| 326 | DPPIV (v074) [ng/mL]       | 0.274311426 | SSC-no PAH | 248.5909091 | 51.0738579  | 168   | 216    | 244   | 300    | 336  | NA          |



|     |                            |             |            |             |             |       |        |       |        |       |             |
|-----|----------------------------|-------------|------------|-------------|-------------|-------|--------|-------|--------|-------|-------------|
| 327 | DPPIV (v074) [ng/mL]       | 0.274311426 | SSC-PAH    | 231.4545455 | 80.07242393 | 137   | 181    | 222   | 261.75 | 521   | 0.180357963 |
| 328 | CLU (v062) [ug/mL]         | 0.272466501 | All        | 242.3181818 | 48.89084792 | 153   | 209    | 239   | 270.5  | 339   | NA          |
| 329 | CLU (v062) [ug/mL]         | 0.272466501 | SSC-no PAH | 248.4090909 | 52.32832165 | 155   | 224.5  | 245.5 | 280.25 | 338   | NA          |
| 330 | CLU (v062) [ug/mL]         | 0.272466501 | SSC-PAH    | 236.2272727 | 45.59023686 | 153   | 208.25 | 232   | 259    | 339   | 0.411712297 |
| 331 | TARC (v275) [ng/mL]        | 0.272403837 | All        | 0.590431818 | 0.346880208 | 0.079 | 0.35   | 0.515 | 0.8025 | 1.8   | NA          |
| 332 | TARC (v275) [ng/mL]        | 0.272403837 | SSC-no PAH | 0.697227273 | 0.418573079 | 0.079 | 0.375  | 0.68  | 0.8875 | 1.8   | NA          |
| 333 | TARC (v275) [ng/mL]        | 0.272403837 | SSC-PAH    | 0.483636364 | 0.217442832 | 0.22  | 0.33   | 0.47  | 0.615  | 1.1   | 0.060664794 |
| 334 | RBP-4 (v251) [ug/mL]       | 0.272089512 | All        | 42.70454545 | 19.91911498 | 10    | 33.75  | 40.5  | 49.25  | 137   | NA          |
| 335 | RBP-4 (v251) [ug/mL]       | 0.272089512 | SSC-no PAH | 43.72727273 | 23.57598015 | 15    | 35.25  | 40.5  | 48.25  | 137   | NA          |
| 336 | RBP-4 (v251) [ug/mL]       | 0.272089512 | SSC-PAH    | 41.68181818 | 15.95047802 | 10    | 31.5   | 40.5  | 50.75  | 68    | 0.875339785 |
| 337 | hCG (v126) [mIU/mL]        | 0.27033184  | All        | 2.552272727 | 1.259473614 | 1.9   | 1.9    | 1.9   | 2.3    | 7     | NA          |
| 338 | hCG (v126) [mIU/mL]        | 0.27033184  | SSC-no PAH | 2.759090909 | 1.587048501 | 1.9   | 1.9    | 1.9   | 2.275  | 7     | NA          |
| 339 | hCG (v126) [mIU/mL]        | 0.27033184  | SSC-PAH    | 2.345454545 | 0.799837646 | 1.9   | 1.9    | 1.9   | 2.275  | 4.5   | 0.63696693  |
| 340 | MPO (v209) [ng/mL]         | 0.269041242 | All        | 1207.75     | 803.5176479 | 165   | 624.75 | 1045  | 1655   | 3660  | NA          |
| 341 | MPO (v209) [ng/mL]         | 0.269041242 | SSC-no PAH | 1010.454545 | 467.6482935 | 249   | 629.75 | 1045  | 1255   | 2110  | NA          |
| 342 | MPO (v209) [ng/mL]         | 0.269041242 | SSC-PAH    | 1405.045455 | 1010.82783  | 165   | 623.25 | 1166  | 2020   | 3660  | 0.360588839 |
| 343 | Vitronectin (v311) [ug/mL] | 0.268966646 | All        | 1948.772727 | 708.5992689 | 600   | 1470   | 1950  | 2355   | 3560  | NA          |
| 344 | Vitronectin (v311) [ug/mL] | 0.268966646 | SSC-no PAH | 2214.545455 | 547.2156994 | 1370  | 1887.5 | 2150  | 2550   | 3440  | NA          |
| 345 | Vitronectin (v311) [ug/mL] | 0.268966646 | SSC-PAH    | 1683        | 762.0324952 | 600   | 1122.5 | 1645  | 2247.5 | 3560  | 0.013805937 |
| 346 | IL-18bp (v167) [ng/mL]     | 0.268402842 | All        | 14.29772727 | 5.492933669 | 5     | 9.975  | 14    | 18.25  | 28    | NA          |
| 347 | IL-18bp (v167) [ng/mL]     | 0.268402842 | SSC-no PAH | 11.38636364 | 4.36177066  | 5     | 7.125  | 11.5  | 14.5   | 19    | NA          |
| 348 | IL-18bp (v167) [ng/mL]     | 0.268402842 | SSC-PAH    | 17.20909091 | 4.999705619 | 7.7   | 13.5   | 18    | 20     | 28    | 0.00027981  |
| 349 | AFP (v010) [ng/mL]         | 0.265777565 | All        | 1.086363636 | 0.263068573 | 0.98  | 0.98   | 0.98  | 0.98   | 2     | NA          |
| 350 | AFP (v010) [ng/mL]         | 0.265777565 | SSC-no PAH | 1.158181818 | 0.348870782 | 0.98  | 0.98   | 0.98  | 1.07   | 2     | NA          |
| 351 | AFP (v010) [ng/mL]         | 0.265777565 | SSC-PAH    | 1.014545455 | 0.095853423 | 0.98  | 0.98   | 0.98  | 0.98   | 1.3   | 0.170981706 |
| 352 | TATI (v224) [ng/mL]        | 0.26469091  | All        | 23.81363636 | 23.18761288 | 6.9   | 11     | 17    | 24.5   | 136   | NA          |
| 353 | TATI (v224) [ng/mL]        | 0.26469091  | SSC-no PAH | 20.33181818 | 19.01025754 | 6.9   | 10.25  | 12    | 22.5   | 80    | NA          |
| 354 | TATI (v224) [ng/mL]        | 0.26469091  | SSC-PAH    | 27.29545455 | 26.72345995 | 7.3   | 15.25  | 20    | 29.5   | 136   | 0.071128752 |
| 355 | DKK-1 (v073) [ng/mL]       | 0.261307193 | All        | 0.573863636 | 0.221267132 | 0.12  | 0.4475 | 0.57  | 0.685  | 1.1   | NA          |
| 356 | DKK-1 (v073) [ng/mL]       | 0.261307193 | SSC-no PAH | 0.614545455 | 0.246629224 | 0.16  | 0.4625 | 0.57  | 0.73   | 1.1   | NA          |
| 357 | DKK-1 (v073) [ng/mL]       | 0.261307193 | SSC-PAH    | 0.533181818 | 0.189620834 | 0.12  | 0.4175 | 0.57  | 0.6575 | 0.84  | 0.336036948 |
| 358 | CgA (v060) [ng/mL]         | 0.260340818 | All        | 2834.431818 | 3826.063928 | 149   | 464.75 | 1110  | 2840   | 14800 | NA          |
| 359 | CgA (v060) [ng/mL]         | 0.260340818 | SSC-no PAH | 2585.545455 | 3956.109822 | 268   | 433.75 | 917   | 2560   | 14100 | NA          |

|     |                           |             |            |             |             |      |        |       |        |        |             |
|-----|---------------------------|-------------|------------|-------------|-------------|------|--------|-------|--------|--------|-------------|
| 360 | CgA (v060) [ng/mL]        | 0.260340818 | SSC-PAH    | 3083.318182 | 3767.495346 | 149  | 585.5  | 1235  | 5392.5 | 14800  | 0.662837696 |
| 361 | PLGF (v233) [pg/mL]       | 0.260100016 | All        | 37.65909091 | 6.509182001 | 34   | 34     | 34    | 38     | 64     | NA          |
| 362 | PLGF (v233) [pg/mL]       | 0.260100016 | SSC-no PAH | 36.13636364 | 4.410976078 | 34   | 34     | 34    | 37     | 53     | NA          |
| 363 | PLGF (v233) [pg/mL]       | 0.260100016 | SSC-PAH    | 39.18181818 | 7.901997117 | 34   | 34     | 35.5  | 41     | 64     | 0.13138288  |
| 364 | Apo B (v023) [ug/mL]      | 0.259913915 | All        | 1168.522727 | 508.9485508 | 181  | 836.5  | 993.5 | 1522.5 | 2300   | NA          |
| 365 | Apo B (v023) [ug/mL]      | 0.259913915 | SSC-no PAH | 1325.772727 | 501.6198458 | 610  | 971    | 1295  | 1732.5 | 2300   | NA          |
| 366 | Apo B (v023) [ug/mL]      | 0.259913915 | SSC-PAH    | 1011.272727 | 476.4025091 | 181  | 718.75 | 890   | 1257.5 | 2130   | 0.040845854 |
| 367 | SDF-1 (v262) [pg/mL]      | 0.259874715 | All        | 3202.272727 | 699.1551833 | 1460 | 2857.5 | 3205  | 3580   | 4920   | NA          |
| 368 | SDF-1 (v262) [pg/mL]      | 0.259874715 | SSC-no PAH | 3159.090909 | 719.9663292 | 1460 | 2992.5 | 3170  | 3542.5 | 4250   | NA          |
| 369 | SDF-1 (v262) [pg/mL]      | 0.259874715 | SSC-PAH    | 3245.454545 | 691.8486435 | 2190 | 2775   | 3230  | 3670   | 4920   | 0.731731293 |
| 370 | IGFBP-1 (v132) [ng/mL]    | 0.258893503 | All        | 15.11954545 | 16.36910419 | 0.69 | 2.575  | 8.3   | 23     | 61     | NA          |
| 371 | IGFBP-1 (v132) [ng/mL]    | 0.258893503 | SSC-no PAH | 9.784545455 | 13.13670457 | 0.69 | 1.575  | 5.55  | 11.75  | 57     | NA          |
| 372 | IGFBP-1 (v132) [ng/mL]    | 0.258893503 | SSC-PAH    | 20.45454545 | 17.78894058 | 1.3  | 4.65   | 20    | 32.5   | 61     | 0.015786603 |
| 373 | IP-10 (v142) [pg/mL]      | 0.258419712 | All        | 263.4545455 | 219.5917411 | 64   | 119.75 | 196   | 337    | 1070   | NA          |
| 374 | IP-10 (v142) [pg/mL]      | 0.258419712 | SSC-no PAH | 267.7272727 | 221.199798  | 93   | 119.25 | 207.5 | 351    | 1070   | NA          |
| 375 | IP-10 (v142) [pg/mL]      | 0.258419712 | SSC-PAH    | 259.1818182 | 223.0911913 | 64   | 133    | 184.5 | 230.5  | 968    | 0.731730123 |
| 376 | Factor VII (v087) [ng/mL] | 0.258127975 | All        | 375.8636364 | 129.2154485 | 55   | 285.75 | 365   | 453.25 | 668    | NA          |
| 377 | Factor VII (v087) [ng/mL] | 0.258127975 | SSC-no PAH | 397.3636364 | 138.7775011 | 55   | 304    | 390   | 469    | 668    | NA          |
| 378 | Factor VII (v087) [ng/mL] | 0.258127975 | SSC-PAH    | 354.3636364 | 118.1550819 | 147  | 281.25 | 342   | 416.5  | 649    | 0.240762031 |
| 379 | CEA (v046) [ng/mL]        | 0.25811403  | All        | 3.132272727 | 9.174641204 | 0.47 | 0.78   | 1.45  | 2.2    | 62     | NA          |
| 380 | CEA (v046) [ng/mL]        | 0.25811403  | SSC-no PAH | 1.786363636 | 1.48358172  | 0.47 | 0.74   | 1.35  | 2.2    | 6.4    | NA          |
| 381 | CEA (v046) [ng/mL]        | 0.25811403  | SSC-PAH    | 4.478181818 | 12.89805767 | 0.58 | 1.125  | 1.45  | 2.1    | 62     | 0.466570975 |
| 382 | IL-22 (v168) [ng/mL]      | 0.25659475  | All        | 0.312954545 | 0.092399022 | 0.17 | 0.26   | 0.31  | 0.35   | 0.66   | NA          |
| 383 | IL-22 (v168) [ng/mL]      | 0.25659475  | SSC-no PAH | 0.340454545 | 0.107812769 | 0.17 | 0.285  | 0.33  | 0.37   | 0.66   | NA          |
| 384 | IL-22 (v168) [ng/mL]      | 0.25659475  | SSC-PAH    | 0.285454545 | 0.065372724 | 0.17 | 0.2375 | 0.28  | 0.3475 | 0.39   | 0.080501635 |
| 385 | TRAIL-R3 (v284) [ng/mL]   | 0.256530013 | All        | 12.97954545 | 6.788244954 | 3.4  | 8.3    | 12    | 16     | 40     | NA          |
| 386 | TRAIL-R3 (v284) [ng/mL]   | 0.256530013 | SSC-no PAH | 9.809090909 | 4.041912453 | 3.4  | 6.325  | 9.75  | 12     | 19     | NA          |
| 387 | TRAIL-R3 (v284) [ng/mL]   | 0.256530013 | SSC-PAH    | 16.15       | 7.546979844 | 5.4  | 10.5   | 15    | 21.25  | 40     | 0.001547934 |
| 388 | SAA (v255) [ng/mL]        | 0.255628123 | All        | 28344.77273 | 48007.1973  | 1360 | 4300   | 8540  | 26600  | 229000 | NA          |
| 389 | SAA (v255) [ng/mL]        | 0.255628123 | SSC-no PAH | 22358.63636 | 29415.69605 | 2740 | 7062.5 | 10015 | 19500  | 116000 | NA          |
| 390 | SAA (v255) [ng/mL]        | 0.255628123 | SSC-PAH    | 34330.90909 | 61471.66501 | 1360 | 3505   | 5580  | 31700  | 229000 | 0.255301652 |
| 391 | TN-X (v268) [ng/mL]       | 0.25052065  | All        | 113.0454545 | 75.77320952 | 11   | 56     | 94.5  | 156    | 305    | NA          |
| 392 | TN-X (v268) [ng/mL]       | 0.25052065  | SSC-no PAH | 84.54545455 | 55.20673464 | 11   | 44.25  | 70.5  | 111    | 249    | NA          |

|     |                                 |             |            |             |             |       |        |       |        |       |             |
|-----|---------------------------------|-------------|------------|-------------|-------------|-------|--------|-------|--------|-------|-------------|
| 393 | TN-X (v268) [ng/mL]             | 0.25052065  | SSC-PAH    | 141.5454545 | 83.70738562 | 44    | 67.25  | 139   | 175.25 | 305   | 0.014296573 |
| 394 | MDC (v185) [pg/mL]              | 0.24943894  | All        | 542.4772727 | 174.2464825 | 208   | 409.75 | 538.5 | 686.75 | 960   | NA          |
| 395 | MDC (v185) [pg/mL]              | 0.24943894  | SSC-no PAH | 547.3181818 | 177.9540835 | 248   | 438    | 523   | 665.75 | 960   | NA          |
| 396 | MDC (v185) [pg/mL]              | 0.24943894  | SSC-PAH    | 537.6363636 | 174.5070733 | 208   | 382    | 546   | 686.5  | 872   | 0.893421861 |
| 397 | Tweak (v291) [ng/mL]            | 0.247610249 | All        | 0.222681818 | 0.052501948 | 0.058 | 0.18   | 0.225 | 0.26   | 0.38  | NA          |
| 398 | Tweak (v291) [ng/mL]            | 0.247610249 | SSC-no PAH | 0.225363636 | 0.050620479 | 0.058 | 0.21   | 0.23  | 0.26   | 0.29  | NA          |
| 399 | Tweak (v291) [ng/mL]            | 0.247610249 | SSC-PAH    | 0.22        | 0.055377492 | 0.16  | 0.1725 | 0.2   | 0.25   | 0.38  | 0.289967721 |
| 400 | CTSB (v050) [ng/mL]             | 0.247597104 | All        | 62.02272727 | 37.02512575 | 20    | 35.75  | 54.5  | 74     | 213   | NA          |
| 401 | CTSB (v050) [ng/mL]             | 0.247597104 | SSC-no PAH | 57.22727273 | 44.60507319 | 20    | 33     | 44.5  | 63.5   | 213   | NA          |
| 402 | CTSB (v050) [ng/mL]             | 0.247597104 | SSC-PAH    | 66.81818182 | 27.73451754 | 30    | 44.75  | 64.5  | 75.5   | 140   | 0.036243495 |
| 403 | MMP-3 (v196) [ng/mL]            | 0.247493172 | All        | 10.33863636 | 8.800032133 | 2.9   | 5.5    | 7.2   | 10.25  | 44    | NA          |
| 404 | MMP-3 (v196) [ng/mL]            | 0.247493172 | SSC-no PAH | 10.01363636 | 9.422076177 | 2.9   | 5.125  | 7.1   | 9.9    | 44    | NA          |
| 405 | MMP-3 (v196) [ng/mL]            | 0.247493172 | SSC-PAH    | 10.66363636 | 8.340980041 | 4     | 5.625  | 7.65  | 10.75  | 37    | 0.488628612 |
| 406 | IL-1RII (v148) [ng/mL]          | 0.246811489 | All        | 7.686363636 | 2.534835521 | 4.3   | 5.4    | 7.35  | 9.075  | 15    | NA          |
| 407 | IL-1RII (v148) [ng/mL]          | 0.246811489 | SSC-no PAH | 8.163636364 | 2.623981971 | 4.3   | 6.175  | 8.55  | 8.975  | 15    | NA          |
| 408 | IL-1RII (v148) [ng/mL]          | 0.246811489 | SSC-PAH    | 7.209090909 | 2.407114275 | 4.5   | 5.225  | 5.95  | 9.225  | 12    | 0.341985607 |
| 409 | MIP-1 alpha (v186) [pg/mL]      | 0.245904735 | All        | 37          | 24.59627501 | 25    | 25     | 27    | 43     | 180   | NA          |
| 410 | MIP-1 alpha (v186) [pg/mL]      | 0.245904735 | SSC-no PAH | 32.72727273 | 10.62423921 | 25    | 25     | 25    | 43     | 55    | NA          |
| 411 | MIP-1 alpha (v186) [pg/mL]      | 0.245904735 | SSC-PAH    | 41.27272727 | 32.97933237 | 25    | 25     | 33    | 41     | 180   | 0.491665682 |
| 412 | AXL (v029) [ng/mL]              | 0.245104204 | All        | 9.097727273 | 4.001016652 | 2.1   | 6.5    | 8.05  | 11     | 19    | NA          |
| 413 | AXL (v029) [ng/mL]              | 0.245104204 | SSC-no PAH | 7.509090909 | 2.838663182 | 2.1   | 5.9    | 7.35  | 8.6    | 14    | NA          |
| 414 | AXL (v029) [ng/mL]              | 0.245104204 | SSC-PAH    | 10.68636364 | 4.408249351 | 4.5   | 7.025  | 10    | 13.75  | 19    | 0.017441884 |
| 415 | Galectin-3 (v103) [ng/mL]       | 0.244840985 | All        | 6.295454545 | 2.596863452 | 1.9   | 4.35   | 6.15  | 7.975  | 13    | NA          |
| 416 | Galectin-3 (v103) [ng/mL]       | 0.244840985 | SSC-no PAH | 5.927272727 | 2.213848581 | 2.6   | 4.65   | 5.95  | 6.85   | 11    | NA          |
| 417 | Galectin-3 (v103) [ng/mL]       | 0.244840985 | SSC-PAH    | 6.663636364 | 2.936558636 | 1.9   | 4.175  | 6.8   | 8.475  | 13    | 0.391900555 |
| 418 | HGF receptor (v124) [ng/mL]     | 0.24424773  | All        | 61.54318182 | 18.2489426  | 5.9   | 51     | 60.5  | 72.25  | 118   | NA          |
| 419 | HGF receptor (v124) [ng/mL]     | 0.24424773  | SSC-no PAH | 59.63636364 | 11.59452028 | 40    | 51.5   | 57.5  | 66.75  | 83    | NA          |
| 420 | HGF receptor (v124) [ng/mL]     | 0.24424773  | SSC-PAH    | 63.45       | 23.23477996 | 5.9   | 48     | 67.5  | 75.25  | 118   | 0.404855851 |
| 421 | SCFR (v193) [ng/mL]             | 0.243640555 | All        | 12.37272727 | 3.431479689 | 6.4   | 10     | 11.5  | 14.25  | 23    | NA          |
| 422 | SCFR (v193) [ng/mL]             | 0.243640555 | SSC-no PAH | 11.64090909 | 3.04265847  | 6.4   | 9.7    | 10.5  | 13.75  | 18    | NA          |
| 423 | SCFR (v193) [ng/mL]             | 0.243640555 | SSC-PAH    | 13.10454545 | 3.705527052 | 6.9   | 11     | 12    | 15.75  | 23    | 0.139904713 |
| 424 | Thrombospondin-1 (v273) [ng/mL] | 0.243212399 | All        | 27031.81818 | 11249.69339 | 4720  | 20975  | 25350 | 33300  | 63000 | NA          |
| 425 | Thrombospondin-1 (v273) [ng/mL] | 0.243212399 | SSC-no PAH | 29101.36364 | 13345.80094 | 8820  | 21350  | 30150 | 34900  | 63000 | NA          |

|     |                                 |             |            |             |             |      |        |        |         |       |             |
|-----|---------------------------------|-------------|------------|-------------|-------------|------|--------|--------|---------|-------|-------------|
| 426 | Thrombospondin-1 (v273) [ng/mL] | 0.243212399 | SSC-PAH    | 24962.27273 | 8488.422329 | 4720 | 20425  | 25000  | 28175   | 42400 | 0.342314506 |
| 427 | Apo H (v028) [ug/mL]            | 0.242404723 | All        | 315.6818182 | 116.6361412 | 76   | 255.5  | 290    | 370.25  | 705   | NA          |
| 428 | Apo H (v028) [ug/mL]            | 0.242404723 | SSC-no PAH | 326.5909091 | 94.01907562 | 117  | 260    | 319.5  | 368     | 580   | NA          |
| 429 | Apo H (v028) [ug/mL]            | 0.242404723 | SSC-PAH    | 304.7727273 | 136.9921554 | 76   | 226.25 | 278    | 368.5   | 705   | 0.307673218 |
| 430 | Vaspin (v307) [pg/mL]           | 0.241733884 | All        | 132.0681818 | 164.3963443 | 18   | 43     | 83.5   | 161.5   | 832   | NA          |
| 431 | Vaspin (v307) [pg/mL]           | 0.241733884 | SSC-no PAH | 132.4545455 | 171.8592246 | 18   | 32     | 84.5   | 161.25  | 832   | NA          |
| 432 | Vaspin (v307) [pg/mL]           | 0.241733884 | SSC-PAH    | 131.6818182 | 160.6342745 | 18   | 46.5   | 83.5   | 150     | 770   | 0.967558841 |
| 433 | TECK (v276) [pg/mL]             | 0.241384212 | All        | 428.5454545 | 320.1595136 | 109  | 201    | 323    | 593.25  | 1630  | NA          |
| 434 | TECK (v276) [pg/mL]             | 0.241384212 | SSC-no PAH | 347.2727273 | 272.6634384 | 109  | 165.5  | 213.5  | 352.75  | 1130  | NA          |
| 435 | TECK (v276) [pg/mL]             | 0.241384212 | SSC-PAH    | 509.8181818 | 348.8557672 | 136  | 266    | 441.5  | 609.75  | 1630  | 0.034134747 |
| 436 | PECAM-1 (v235) [ng/mL]          | 0.239794014 | All        | 88.88636364 | 28.41815331 | 42   | 70     | 85.5   | 107.25  | 158   | NA          |
| 437 | PECAM-1 (v235) [ng/mL]          | 0.239794014 | SSC-no PAH | 78.63636364 | 26.39362379 | 42   | 60     | 80.5   | 85.75   | 158   | NA          |
| 438 | PECAM-1 (v235) [ng/mL]          | 0.239794014 | SSC-PAH    | 99.13636364 | 27.14563098 | 47   | 82.25  | 98     | 118     | 140   | 0.007193517 |
| 439 | HCC-4 (v059) [ng/mL]            | 0.239666925 | All        | 5.496363636 | 2.596764616 | 0.24 | 3.475  | 5.45   | 7.225   | 10    | NA          |
| 440 | HCC-4 (v059) [ng/mL]            | 0.239666925 | SSC-no PAH | 5.159090909 | 2.53990234  | 1.1  | 3.125  | 5.25   | 6.625   | 10    | NA          |
| 441 | HCC-4 (v059) [ng/mL]            | 0.239666925 | SSC-PAH    | 5.833636364 | 2.667964349 | 0.24 | 4.35   | 5.8    | 8.15    | 10    | 0.379123388 |
| 442 | Cystatin-A (v069) [ng/mL]       | 0.239346169 | All        | 3.5         | 1.775544463 | 1.1  | 2.4    | 3      | 3.85    | 8.6   | NA          |
| 443 | Cystatin-A (v069) [ng/mL]       | 0.239346169 | SSC-no PAH | 2.663636364 | 1.005009099 | 1.1  | 2      | 2.7    | 3.225   | 5.3   | NA          |
| 444 | Cystatin-A (v069) [ng/mL]       | 0.239346169 | SSC-PAH    | 4.336363636 | 1.994885235 | 1.5  | 3      | 3.6    | 5.675   | 8.6   | 0.000964471 |
| 445 | PARC (v246) [ng/mL]             | 0.238321862 | All        | 176.3863636 | 67.88129718 | 71   | 123.75 | 165.5  | 226     | 378   | NA          |
| 446 | PARC (v246) [ng/mL]             | 0.238321862 | SSC-no PAH | 174.4090909 | 68.73805288 | 71   | 129.5  | 165.5  | 211.5   | 378   | NA          |
| 447 | PARC (v246) [ng/mL]             | 0.238321862 | SSC-PAH    | 178.3636364 | 68.57150974 | 72   | 119.5  | 165.5  | 228     | 318   | 0.857096951 |
| 448 | Leptin-R (v179) [ng/mL]         | 0.23760867  | All        | 16.11136364 | 5.922649309 | 4.8  | 12.75  | 15     | 18.25   | 36    | NA          |
| 449 | Leptin-R (v179) [ng/mL]         | 0.23760867  | SSC-no PAH | 14.55       | 3.513206377 | 8.4  | 13     | 14.5   | 15      | 25    | NA          |
| 450 | Leptin-R (v179) [ng/mL]         | 0.23760867  | SSC-PAH    | 17.67272727 | 7.373968488 | 4.8  | 12.25  | 16     | 22.75   | 36    | 0.199120834 |
| 451 | MIF (v190) [ng/mL]              | 0.23751998  | All        | 0.071363636 | 0.080715144 | 0.03 | 0.034  | 0.042  | 0.059   | 0.38  | NA          |
| 452 | MIF (v190) [ng/mL]              | 0.23751998  | SSC-no PAH | 0.057954545 | 0.072864831 | 0.03 | 0.034  | 0.041  | 0.05075 | 0.38  | NA          |
| 453 | MIF (v190) [ng/mL]              | 0.23751998  | SSC-PAH    | 0.084772727 | 0.087487649 | 0.03 | 0.036  | 0.0485 | 0.0785  | 0.34  | 0.22567807  |
| 454 | Resistin (v250) [ng/mL]         | 0.236874487 | All        | 2.690681818 | 1.593981993 | 0.42 | 1.675  | 2.5    | 3.1     | 8.7   | NA          |
| 455 | Resistin (v250) [ng/mL]         | 0.236874487 | SSC-no PAH | 2.363181818 | 1.449818992 | 0.42 | 1.5    | 2.1    | 2.875   | 6.9   | NA          |
| 456 | Resistin (v250) [ng/mL]         | 0.236874487 | SSC-PAH    | 3.018181818 | 1.695831405 | 1.1  | 2.025  | 2.7    | 3.1     | 8.7   | 0.099270068 |
| 457 | IgA (v128) [mg/mL]              | 0.236426654 | All        | 3.398409091 | 1.728036853 | 0.63 | 2.1    | 3      | 4.125   | 8.3   | NA          |
| 458 | IgA (v128) [mg/mL]              | 0.236426654 | SSC-no PAH | 3.259090909 | 1.693027463 | 1.4  | 2      | 2.85   | 3.8     | 7.5   | NA          |

|     |                            |             |            |             |             |      |        |       |        |       |             |
|-----|----------------------------|-------------|------------|-------------|-------------|------|--------|-------|--------|-------|-------------|
| 459 | IgA (v128) [mg/mL]         | 0.236426654 | SSC-PAH    | 3.537727273 | 1.790924028 | 0.63 | 2.2    | 3.15  | 4.5    | 8.3   | 0.459698954 |
| 460 | ITAC (v143) [pg/mL]        | 0.235731724 | All        | 30.09090909 | 16.61859169 | 11   | 16.75  | 26    | 38.75  | 90    | NA          |
| 461 | ITAC (v143) [pg/mL]        | 0.235731724 | SSC-no PAH | 27          | 12.32496499 | 12   | 16.5   | 24.5  | 32.75  | 52    | NA          |
| 462 | ITAC (v143) [pg/mL]        | 0.235731724 | SSC-PAH    | 33.18181818 | 19.83896206 | 11   | 17.75  | 30    | 42.5   | 90    | 0.398112719 |
| 463 | Osteocalcin (v219) [ng/mL] | 0.235418924 | All        | 57.79545455 | 36.83374309 | 18   | 32.5   | 47.5  | 72.5   | 195   | NA          |
| 464 | Osteocalcin (v219) [ng/mL] | 0.235418924 | SSC-no PAH | 49.54545455 | 28.08274724 | 18   | 30.75  | 43.5  | 56.25  | 138   | NA          |
| 465 | Osteocalcin (v219) [ng/mL] | 0.235418924 | SSC-PAH    | 66.04545455 | 42.97449661 | 21   | 36.25  | 49.5  | 89     | 195   | 0.21784974  |
| 466 | NAP-2 (v216) [ng/mL]       | 0.234872672 | All        | 8156.363636 | 2480.618913 | 2840 | 6602.5 | 7865  | 9220   | 15400 | NA          |
| 467 | NAP-2 (v216) [ng/mL]       | 0.234872672 | SSC-no PAH | 8685.454545 | 2708.812299 | 3670 | 6822.5 | 8480  | 9500   | 15400 | NA          |
| 468 | NAP-2 (v216) [ng/mL]       | 0.234872672 | SSC-PAH    | 7627.272727 | 2162.351414 | 2840 | 6587.5 | 7500  | 8610   | 11300 | 0.255301564 |
| 469 | BAFF (v030) [pg/mL]        | 0.232235297 | All        | 723.9318182 | 374.2738953 | 253  | 456.25 | 592.5 | 905.25 | 1850  | NA          |
| 470 | BAFF (v030) [pg/mL]        | 0.232235297 | SSC-no PAH | 584.0454545 | 230.0131419 | 253  | 426.5  | 517.5 | 732.25 | 1040  | NA          |
| 471 | BAFF (v030) [pg/mL]        | 0.232235297 | SSC-PAH    | 863.8181818 | 439.2338174 | 262  | 523.75 | 789.5 | 1207.5 | 1850  | 0.026721687 |
| 472 | ST2 (v260) [ng/mL]         | 0.230239901 | All        | 9.395454545 | 6.557011321 | 3.4  | 5.075  | 6.9   | 12     | 35    | NA          |
| 473 | ST2 (v260) [ng/mL]         | 0.230239901 | SSC-no PAH | 7.645454545 | 4.797392871 | 3.4  | 4.75   | 5.9   | 7.9    | 24    | NA          |
| 474 | ST2 (v260) [ng/mL]         | 0.230239901 | SSC-PAH    | 11.14545455 | 7.655357742 | 4.2  | 5.675  | 10    | 12     | 35    | 0.06385967  |
| 475 | P-Selectin (v222) [ng/mL]  | 0.229278049 | All        | 156.6818182 | 59.03438995 | 49   | 118.25 | 159   | 195    | 301   | NA          |
| 476 | P-Selectin (v222) [ng/mL]  | 0.229278049 | SSC-no PAH | 143.4090909 | 60.92357358 | 57   | 110.5  | 135   | 173.25 | 295   | NA          |
| 477 | P-Selectin (v222) [ng/mL]  | 0.229278049 | SSC-PAH    | 169.9545455 | 55.2746194  | 49   | 129.5  | 165.5 | 202.5  | 301   | 0.109669219 |
| 478 | IL-6r (v155) [ng/mL]       | 0.228859324 | All        | 27.60681818 | 10.06449892 | 4.4  | 20.75  | 27    | 35.25  | 48    | NA          |
| 479 | IL-6r (v155) [ng/mL]       | 0.228859324 | SSC-no PAH | 27.92727273 | 10.25123369 | 4.4  | 21.25  | 27    | 35     | 48    | NA          |
| 480 | IL-6r (v155) [ng/mL]       | 0.228859324 | SSC-PAH    | 27.28636364 | 10.10489252 | 7.3  | 20.25  | 25    | 34.75  | 46    | 0.793569498 |
| 481 | MSP (v191) [ng/mL]         | 0.228125228 | All        | 116.2954545 | 51.38028739 | 29   | 77.25  | 109   | 143    | 269   | NA          |
| 482 | MSP (v191) [ng/mL]         | 0.228125228 | SSC-no PAH | 123.2727273 | 48.79420518 | 29   | 91     | 114   | 159.25 | 205   | NA          |
| 483 | MSP (v191) [ng/mL]         | 0.228125228 | SSC-PAH    | 109.3181818 | 54.06203347 | 39   | 75     | 103.5 | 123    | 269   | 0.192346191 |
| 484 | IL-6R beta (v156) [ng/mL]  | 0.227991771 | All        | 243.3863636 | 53.0240033  | 147  | 201    | 244.5 | 281.25 | 373   | NA          |
| 485 | IL-6R beta (v156) [ng/mL]  | 0.227991771 | SSC-no PAH | 214.9545455 | 40.40683261 | 147  | 192    | 203.5 | 246.25 | 317   | NA          |
| 486 | IL-6R beta (v156) [ng/mL]  | 0.227991771 | SSC-PAH    | 271.8181818 | 49.30047461 | 160  | 244.25 | 266   | 295    | 373   | 0.000143105 |
| 487 | PGI (v227) [ng/mL]         | 0.227672332 | All        | 325.1590909 | 241.5169062 | 54   | 161.75 | 232.5 | 377    | 1000  | NA          |
| 488 | PGI (v227) [ng/mL]         | 0.227672332 | SSC-no PAH | 272.1818182 | 210.1574549 | 54   | 119    | 189   | 350.25 | 854   | NA          |
| 489 | PGI (v227) [ng/mL]         | 0.227672332 | SSC-PAH    | 378.1363636 | 263.4233051 | 113  | 187.5  | 254   | 577.25 | 1000  | 0.083417758 |
| 490 | LOX-1 (v177) [ng/mL]       | 0.226128375 | All        | 1.006818182 | 0.539098182 | 0.63 | 0.63   | 0.86  | 1.1    | 2.9   | NA          |
| 491 | LOX-1 (v177) [ng/mL]       | 0.226128375 | SSC-no PAH | 0.822272727 | 0.210756728 | 0.63 | 0.64   | 0.785 | 0.925  | 1.5   | NA          |

|     |                            |             |            |             |             |      |        |       |        |      |             |
|-----|----------------------------|-------------|------------|-------------|-------------|------|--------|-------|--------|------|-------------|
| 492 | LOX-1 (v177) [ng/mL]       | 0.226128375 | SSC-PAH    | 1.191363636 | 0.692327307 | 0.63 | 0.63   | 0.945 | 1.625  | 2.9  | 0.156390119 |
| 493 | TBG (v279) [ug/mL]         | 0.225245611 | All        | 43.95454545 | 9.489172644 | 20   | 39     | 43.5  | 49     | 68   | NA          |
| 494 | TBG (v279) [ug/mL]         | 0.225245611 | SSC-no PAH | 44.59090909 | 7.799017587 | 32   | 41     | 43    | 46     | 68   | NA          |
| 495 | TBG (v279) [ug/mL]         | 0.225245611 | SSC-PAH    | 43.31818182 | 11.07715953 | 20   | 36.5   | 45    | 51.25  | 62   | 0.856907309 |
| 496 | Prostasin (v242) [ng/mL]   | 0.225210961 | All        | 276.2727273 | 122.4014295 | 97   | 184.5  | 246   | 344.25 | 601  | NA          |
| 497 | Prostasin (v242) [ng/mL]   | 0.225210961 | SSC-no PAH | 259.5       | 121.6723743 | 103  | 172.75 | 243   | 290.5  | 601  | NA          |
| 498 | Prostasin (v242) [ng/mL]   | 0.225210961 | SSC-PAH    | 293.0454545 | 123.6286595 | 97   | 195    | 269.5 | 375    | 593  | 0.29127668  |
| 499 | MMP-1 (v194) [ng/mL]       | 0.223131303 | All        | 24.15454545 | 28.26096375 | 1.3  | 9.25   | 16    | 25.5   | 167  | NA          |
| 500 | MMP-1 (v194) [ng/mL]       | 0.223131303 | SSC-no PAH | 17.25       | 10.64043277 | 2.9  | 9.325  | 14    | 23.25  | 49   | NA          |
| 501 | MMP-1 (v194) [ng/mL]       | 0.223131303 | SSC-PAH    | 31.05909091 | 37.71328753 | 1.3  | 9.15   | 17.5  | 32.5   | 167  | 0.398207096 |
| 502 | MIP-1 beta (v187) [pg/mL]  | 0.221211577 | All        | 339.8409091 | 262.0880327 | 45   | 202.5  | 260.5 | 432.75 | 1740 | NA          |
| 503 | MIP-1 beta (v187) [pg/mL]  | 0.221211577 | SSC-no PAH | 316.2727273 | 176.6503627 | 45   | 193.5  | 244.5 | 427.25 | 734  | NA          |
| 504 | MIP-1 beta (v187) [pg/mL]  | 0.221211577 | SSC-PAH    | 363.4090909 | 329.0623995 | 103  | 219.5  | 270.5 | 427.75 | 1740 | 0.802677898 |
| 505 | Apo A-II (v021) [ng/mL]    | 0.220791508 | All        | 333.7954545 | 100.7565751 | 143  | 260.25 | 319.5 | 382.5  | 546  | NA          |
| 506 | Apo A-II (v021) [ng/mL]    | 0.220791508 | SSC-no PAH | 363.4545455 | 98.21295001 | 216  | 279.5  | 359   | 451    | 543  | NA          |
| 507 | Apo A-II (v021) [ng/mL]    | 0.220791508 | SSC-PAH    | 304.1363636 | 96.42776495 | 143  | 239.75 | 297.5 | 364    | 546  | 0.06240545  |
| 508 | Osteopontin (v220) [ng/mL] | 0.220628736 | All        | 23.75681818 | 51.65079255 | 4.7  | 12     | 15    | 19     | 354  | NA          |
| 509 | Osteopontin (v220) [ng/mL] | 0.220628736 | SSC-no PAH | 14          | 5.590297718 | 4.7  | 10.425 | 14    | 16     | 27   | NA          |
| 510 | Osteopontin (v220) [ng/mL] | 0.220628736 | SSC-PAH    | 33.51363636 | 72.33213931 | 5.3  | 12.25  | 16.5  | 19.75  | 354  | 0.103824167 |
| 511 | MCP-2 (v204) [pg/mL]       | 0.220278328 | All        | 45.96818182 | 23.13736305 | 7.6  | 30.75  | 41.5  | 57.75  | 139  | NA          |
| 512 | MCP-2 (v204) [pg/mL]       | 0.220278328 | SSC-no PAH | 47.81818182 | 27.44628757 | 18   | 30.25  | 43    | 56     | 139  | NA          |
| 513 | MCP-2 (v204) [pg/mL]       | 0.220278328 | SSC-PAH    | 44.11818182 | 18.32205635 | 7.6  | 31.25  | 41.5  | 60.75  | 78   | 0.912085176 |
| 514 | Adiponectin (v002) [ug/mL] | 0.219950666 | All        | 8.620454545 | 7.362809737 | 1.7  | 3.35   | 6.25  | 11     | 38   | NA          |
| 515 | Adiponectin (v002) [ug/mL] | 0.219950666 | SSC-no PAH | 7.159090909 | 7.696112754 | 1.7  | 2.8    | 4.9   | 8.825  | 38   | NA          |
| 516 | Adiponectin (v002) [ug/mL] | 0.219950666 | SSC-PAH    | 10.08181818 | 6.877405128 | 3    | 4.625  | 9.25  | 12.75  | 26   | 0.032136053 |
| 517 | Apo C-I (v024) [ng/mL]     | 0.219854919 | All        | 337.3409091 | 122.0893579 | 132  | 254.25 | 333   | 417.5  | 613  | NA          |
| 518 | Apo C-I (v024) [ng/mL]     | 0.219854919 | SSC-no PAH | 382.7727273 | 115.1727199 | 218  | 301.25 | 367.5 | 442.25 | 613  | NA          |
| 519 | Apo C-I (v024) [ng/mL]     | 0.219854919 | SSC-PAH    | 291.9090909 | 113.7189137 | 132  | 188.5  | 283.5 | 371.5  | 544  | 0.013343399 |
| 520 | IL-1RI (v147) [pg/mL]      | 0.218819716 | All        | 1353.659091 | 451.4276034 | 441  | 1145   | 1335  | 1565   | 2420 | NA          |
| 521 | IL-1RI (v147) [pg/mL]      | 0.218819716 | SSC-no PAH | 1151.681818 | 354.1006564 | 500  | 896    | 1230  | 1405   | 1710 | NA          |
| 522 | IL-1RI (v147) [pg/mL]      | 0.218819716 | SSC-PAH    | 1555.636364 | 454.3300191 | 441  | 1305   | 1550  | 1800   | 2420 | 0.001962697 |
| 523 | TTR (v287) [mg/dl]         | 0.218560669 | All        | 29.00227273 | 9.223339673 | 9.1  | 24     | 29.5  | 33.25  | 61   | NA          |
| 524 | TTR (v287) [mg/dl]         | 0.218560669 | SSC-no PAH | 30.59090909 | 9.624666183 | 15   | 24.25  | 30.5  | 33.75  | 61   | NA          |

|     |                                 |             |            |             |             |       |         |        |         |       |             |
|-----|---------------------------------|-------------|------------|-------------|-------------|-------|---------|--------|---------|-------|-------------|
| 525 | TTR (v287) [mg/dl]              | 0.218560669 | SSC-PAH    | 27.41363636 | 8.733204041 | 9.1   | 23      | 27.5   | 32.75   | 41    | 0.341199186 |
| 526 | Cathepsin D (v051) [ng/mL]      | 0.217979871 | All        | 756.5227273 | 288.8027804 | 389   | 572     | 642.5  | 873     | 1450  | NA          |
| 527 | Cathepsin D (v051) [ng/mL]      | 0.217979871 | SSC-no PAH | 708.6363636 | 251.7386297 | 421   | 542     | 636.5  | 802     | 1270  | NA          |
| 528 | Cathepsin D (v051) [ng/mL]      | 0.217979871 | SSC-PAH    | 804.4090909 | 320.326271  | 389   | 590.25  | 646.5  | 915.75  | 1450  | 0.31320556  |
| 529 | Gelsolin (v105) [ug/mL]         | 0.217497646 | All        | 22.18181818 | 4.211129922 | 14    | 19      | 22     | 25      | 31    | NA          |
| 530 | Gelsolin (v105) [ug/mL]         | 0.217497646 | SSC-no PAH | 21.72727273 | 4.176827438 | 14    | 18.25   | 21.5   | 24      | 30    | NA          |
| 531 | Gelsolin (v105) [ug/mL]         | 0.217497646 | SSC-PAH    | 22.63636364 | 4.293355382 | 14    | 19      | 22     | 25      | 31    | 0.429825209 |
| 532 | IL-16 (v164) [pg/mL]            | 0.214013961 | All        | 379.3636364 | 164.3330553 | 166   | 259     | 366    | 466.25  | 1140  | NA          |
| 533 | IL-16 (v164) [pg/mL]            | 0.214013961 | SSC-no PAH | 316.9090909 | 93.42728728 | 194   | 234.25  | 336    | 376.25  | 509   | NA          |
| 534 | IL-16 (v164) [pg/mL]            | 0.214013961 | SSC-PAH    | 441.8181818 | 195.9474265 | 166   | 348.75  | 396.5  | 494.5   | 1140  | 0.011190625 |
| 535 | THP (v266) [ug/mL]              | 0.213860501 | All        | 0.055590909 | 0.023825254 | 0.016 | 0.04075 | 0.053  | 0.0685  | 0.14  | NA          |
| 536 | THP (v266) [ug/mL]              | 0.213860501 | SSC-no PAH | 0.054681818 | 0.019204132 | 0.016 | 0.0415  | 0.0565 | 0.06475 | 0.1   | NA          |
| 537 | THP (v266) [ug/mL]              | 0.213860501 | SSC-PAH    | 0.0565      | 0.028138687 | 0.022 | 0.0345  | 0.052  | 0.07475 | 0.14  | 0.921329885 |
| 538 | CEACAM1 (v047) [ng/mL]          | 0.213796119 | All        | 30.06818182 | 11.65072655 | 11    | 23.75   | 29.5   | 34.25   | 77    | NA          |
| 539 | CEACAM1 (v047) [ng/mL]          | 0.213796119 | SSC-no PAH | 27.09090909 | 8.058766838 | 11    | 22.25   | 27     | 33      | 42    | NA          |
| 540 | CEACAM1 (v047) [ng/mL]          | 0.213796119 | SSC-PAH    | 33.04545455 | 13.94368699 | 14    | 26.25   | 30.5   | 35      | 77    | 0.180244107 |
| 541 | GIP (v104) [ng/mL]              | 0.211992417 | All        | 0.64025     | 0.464512854 | 0.027 | 0.3225  | 0.545  | 0.805   | 1.9   | NA          |
| 542 | GIP (v104) [ng/mL]              | 0.211992417 | SSC-no PAH | 0.670636364 | 0.518536819 | 0.027 | 0.2775  | 0.595  | 0.865   | 1.9   | NA          |
| 543 | GIP (v104) [ng/mL]              | 0.211992417 | SSC-PAH    | 0.609863636 | 0.413526563 | 0.027 | 0.365   | 0.535  | 0.7625  | 1.9   | 0.866169894 |
| 544 | EN-RAGE (v076) [ng/mL]          | 0.211854504 | All        | 117.6590909 | 113.6369051 | 19    | 51.25   | 84     | 139.25  | 684   | NA          |
| 545 | EN-RAGE (v076) [ng/mL]          | 0.211854504 | SSC-no PAH | 88.45454545 | 47.15095037 | 34    | 54.25   | 83.5   | 101.25  | 246   | NA          |
| 546 | EN-RAGE (v076) [ng/mL]          | 0.211854504 | SSC-PAH    | 146.8636364 | 149.7710301 | 19    | 46.5    | 107.5  | 207.5   | 684   | 0.526115817 |
| 547 | vWF (v312) [ug/mL]              | 0.211079183 | All        | 202.6363636 | 96.70239431 | 92    | 147.5   | 172.5  | 232     | 645   | NA          |
| 548 | vWF (v312) [ug/mL]              | 0.211079183 | SSC-no PAH | 205.3636364 | 115.9994029 | 109   | 148     | 172.5  | 214.75  | 645   | NA          |
| 549 | vWF (v312) [ug/mL]              | 0.211079183 | SSC-PAH    | 199.9090909 | 75.34296763 | 92    | 148.5   | 182.5  | 247     | 358   | 0.775896672 |
| 550 | MCP-4 (v206) [pg/mL]            | 0.21081686  | All        | 4817.954545 | 2085.496516 | 1430  | 3350    | 4640   | 5605    | 10900 | NA          |
| 551 | MCP-4 (v206) [pg/mL]            | 0.21081686  | SSC-no PAH | 5076.363636 | 2323.836207 | 1880  | 3467.5  | 4815   | 5755    | 10900 | NA          |
| 552 | MCP-4 (v206) [pg/mL]            | 0.21081686  | SSC-PAH    | 4559.545455 | 1834.550619 | 1430  | 3352.5  | 4305   | 5452.5  | 9350  | 0.518553922 |
| 553 | Aldose Reductase (v004) [ng/mL] | 0.210702366 | All        | 7.379545455 | 2.314421877 | 3.1   | 5.6     | 7.3    | 8.75    | 13    | NA          |
| 554 | Aldose Reductase (v004) [ng/mL] | 0.210702366 | SSC-no PAH | 6.286363636 | 1.950652017 | 3.1   | 4.9     | 6.15   | 7.975   | 9.9   | NA          |
| 555 | Aldose Reductase (v004) [ng/mL] | 0.210702366 | SSC-PAH    | 8.472727273 | 2.158522823 | 5.2   | 7.225   | 7.95   | 9.9     | 13    | 0.002972351 |
| 556 | CD27 (v053) [U/mL]              | 0.210449443 | All        | 35.82272727 | 31.7707549  | 4.6   | 20.75   | 28     | 42.75   | 176   | NA          |
| 557 | CD27 (v053) [U/mL]              | 0.210449443 | SSC-no PAH | 25.76363636 | 16.71037731 | 4.6   | 13.25   | 26     | 28      | 69    | NA          |

|     |                          |             |            |             |             |       |        |       |        |      |             |
|-----|--------------------------|-------------|------------|-------------|-------------|-------|--------|-------|--------|------|-------------|
| 558 | CD27 (v053) [U/mL]       | 0.210449443 | SSC-PAH    | 45.88181818 | 39.69361993 | 9.4   | 26     | 35.5  | 47.25  | 176  | 0.021913439 |
| 559 | IL-8 (v158) [pg/mL]      | 0.210169625 | All        | 19.45681818 | 21.37596344 | 6     | 9.575  | 13    | 17.25  | 111  | NA          |
| 560 | IL-8 (v158) [pg/mL]      | 0.210169625 | SSC-no PAH | 15.95       | 17.14755987 | 6     | 9.125  | 13    | 14.75  | 88   | NA          |
| 561 | IL-8 (v158) [pg/mL]      | 0.210169625 | SSC-PAH    | 22.96363636 | 24.81565453 | 6     | 9.8    | 13.5  | 21.75  | 111  | 0.346619763 |
| 562 | EGFR (v083) [ng/mL]      | 0.207600932 | All        | 1.945227273 | 0.51008658  | 0.7   | 1.7    | 1.95  | 2.2    | 3.2  | NA          |
| 563 | EGFR (v083) [ng/mL]      | 0.207600932 | SSC-no PAH | 2.009090909 | 0.411627537 | 1     | 1.7    | 2.1   | 2.275  | 2.8  | NA          |
| 564 | EGFR (v083) [ng/mL]      | 0.207600932 | SSC-PAH    | 1.881363636 | 0.595637277 | 0.7   | 1.625  | 1.85  | 2.175  | 3.2  | 0.329086688 |
| 565 | CRP (v037) [ug/mL]       | 0.207571174 | All        | 8.676590909 | 10.72817047 | 0.51  | 2.45   | 5.1   | 10.35  | 59   | NA          |
| 566 | CRP (v037) [ug/mL]       | 0.207571174 | SSC-no PAH | 6.367727273 | 5.022441004 | 0.59  | 2.925  | 4.9   | 7.325  | 20   | NA          |
| 567 | CRP (v037) [ug/mL]       | 0.207571174 | SSC-PAH    | 10.98545455 | 14.11643073 | 0.51  | 2      | 5.1   | 12.75  | 59   | 0.775855527 |
| 568 | LRG1 (v180) [ug/mL]      | 0.206652176 | All        | 69.63636364 | 25.54074803 | 36    | 51     | 63.5  | 88.25  | 141  | NA          |
| 569 | LRG1 (v180) [ug/mL]      | 0.206652176 | SSC-no PAH | 64.63636364 | 23.23901779 | 36    | 49.25  | 55    | 72.5   | 114  | NA          |
| 570 | LRG1 (v180) [ug/mL]      | 0.206652176 | SSC-PAH    | 74.63636364 | 27.26334615 | 36    | 54.25  | 69    | 89     | 141  | 0.172936672 |
| 571 | CEACAM6 (v048) [ng/mL]   | 0.206352789 | All        | 95.52272727 | 44.99224152 | 38    | 57     | 79.5  | 125.25 | 198  | NA          |
| 572 | CEACAM6 (v048) [ng/mL]   | 0.206352789 | SSC-no PAH | 96.68181818 | 47.72678829 | 38    | 56.25  | 82.5  | 138.75 | 194  | NA          |
| 573 | CEACAM6 (v048) [ng/mL]   | 0.206352789 | SSC-PAH    | 94.36363636 | 43.17797659 | 41    | 57.75  | 78.5  | 118.5  | 198  | 0.949036427 |
| 574 | IL-18 (v166) [pg/mL]     | 0.205405796 | All        | 220.7727273 | 103.9389051 | 53    | 148    | 195.5 | 277.5  | 581  | NA          |
| 575 | IL-18 (v166) [pg/mL]     | 0.205405796 | SSC-no PAH | 192.6818182 | 85.36107419 | 83    | 148    | 181   | 225    | 441  | NA          |
| 576 | IL-18 (v166) [pg/mL]     | 0.205405796 | SSC-PAH    | 248.8636364 | 114.809281  | 53    | 187.75 | 216.5 | 296.75 | 581  | 0.069325242 |
| 577 | TFF3 (v288) [ug/mL]      | 0.205169238 | All        | 0.196636364 | 0.103744339 | 0.067 | 0.13   | 0.19  | 0.2225 | 0.67 | NA          |
| 578 | TFF3 (v288) [ug/mL]      | 0.205169238 | SSC-no PAH | 0.165545455 | 0.087037336 | 0.067 | 0.11   | 0.14  | 0.19   | 0.44 | NA          |
| 579 | TFF3 (v288) [ug/mL]      | 0.205169238 | SSC-PAH    | 0.227727273 | 0.111523298 | 0.11  | 0.1825 | 0.215 | 0.245  | 0.67 | 0.004093425 |
| 580 | LH (v183) [mIU/mL]       | 0.204124157 | All        | 9.956818182 | 5.099128869 | 1.9   | 4.65   | 11    | 14     | 20   | NA          |
| 581 | LH (v183) [mIU/mL]       | 0.204124157 | SSC-no PAH | 11.68181818 | 4.670845377 | 1.9   | 8.025  | 13    | 15     | 20   | NA          |
| 582 | LH (v183) [mIU/mL]       | 0.204124157 | SSC-PAH    | 8.231818182 | 5.018858376 | 2.1   | 4.3    | 6.75  | 11.75  | 18   | 0.017966861 |
| 583 | APRIL (v292) [ng/mL]     | 0.204087688 | All        | 4.279545455 | 2.042180725 | 1.5   | 3      | 4.05  | 4.925  | 11   | NA          |
| 584 | APRIL (v292) [ng/mL]     | 0.204087688 | SSC-no PAH | 3.681818182 | 1.429497535 | 1.7   | 2.625  | 3.55  | 4.35   | 7.1  | NA          |
| 585 | APRIL (v292) [ng/mL]     | 0.204087688 | SSC-PAH    | 4.877272727 | 2.397405705 | 1.5   | 3.125  | 4.5   | 5.25   | 11   | 0.048303167 |
| 586 | Insulin (v131) [uIU/mL]  | 0.20406695  | All        | 6.172727273 | 6.373176479 | 1.1   | 1.1    | 3.65  | 10.175 | 26   | NA          |
| 587 | Insulin (v131) [uIU/mL]  | 0.20406695  | SSC-no PAH | 6.75        | 5.562523408 | 1.1   | 2.3    | 4.45  | 10.725 | 19   | NA          |
| 588 | Insulin (v131) [uIU/mL]  | 0.20406695  | SSC-PAH    | 5.595454545 | 7.178372098 | 1.1   | 1.1    | 1.65  | 7.55   | 26   | 0.103781772 |
| 589 | Ficolin-3 (v101) [ug/mL] | 0.203481625 | All        | 20.72727273 | 6.380798362 | 9     | 16     | 21    | 26     | 33   | NA          |
| 590 | Ficolin-3 (v101) [ug/mL] | 0.203481625 | SSC-no PAH | 23.72727273 | 6.385861005 | 9     | 20.25  | 25    | 27     | 33   | NA          |



|     |                            |             |            |             |             |      |        |       |        |     |             |
|-----|----------------------------|-------------|------------|-------------|-------------|------|--------|-------|--------|-----|-------------|
| 591 | Ficolin-3 (v101) [ug/mL]   | 0.203481625 | SSC-PAH    | 17.72727273 | 4.871509184 | 10   | 14     | 17.5  | 21.75  | 27  | 0.001614605 |
| 592 | NSE (v213) [ng/mL]         | 0.201263088 | All        | 0.78        | 0.813650974 | 0.24 | 0.4825 | 0.555 | 0.7375 | 4.5 | NA          |
| 593 | NSE (v213) [ng/mL]         | 0.201263088 | SSC-no PAH | 0.657272727 | 0.3501589   | 0.24 | 0.49   | 0.605 | 0.715  | 1.9 | NA          |
| 594 | NSE (v213) [ng/mL]         | 0.201263088 | SSC-PAH    | 0.902727273 | 1.096089073 | 0.24 | 0.46   | 0.52  | 0.7525 | 4.5 | 0.88443715  |
| 595 | A2Macro (v009) [mg/mL]     | 0.19813092  | All        | 2.115909091 | 0.534808456 | 1.1  | 1.8    | 2     | 2.4    | 4.1 | NA          |
| 596 | A2Macro (v009) [mg/mL]     | 0.19813092  | SSC-no PAH | 1.936363636 | 0.338829153 | 1.3  | 1.725  | 1.9   | 2.175  | 2.6 | NA          |
| 597 | A2Macro (v009) [mg/mL]     | 0.19813092  | SSC-PAH    | 2.295454545 | 0.635068255 | 1.1  | 2      | 2.2   | 2.55   | 4.1 | 0.023808072 |
| 598 | LAP TGF-b1 (v176) [ng/mL]  | 0.198123977 | All        | 9.488636364 | 3.100053706 | 3.7  | 7.15   | 9.05  | 11     | 17  | NA          |
| 599 | LAP TGF-b1 (v176) [ng/mL]  | 0.198123977 | SSC-no PAH | 9.6         | 3.145669737 | 4.5  | 6.975  | 9.75  | 11     | 16  | NA          |
| 600 | LAP TGF-b1 (v176) [ng/mL]  | 0.198123977 | SSC-PAH    | 9.377272727 | 3.123632168 | 3.7  | 7.625  | 8.65  | 10.75  | 17  | 0.77554014  |
| 601 | G6PI (v109) [ng/mL]        | 0.198095714 | All        | 50.97727273 | 34.03656627 | 21   | 30     | 39.5  | 61.25  | 206 | NA          |
| 602 | G6PI (v109) [ng/mL]        | 0.198095714 | SSC-no PAH | 44.36363636 | 16.41586183 | 25   | 33.5   | 39.5  | 50.75  | 88  | NA          |
| 603 | G6PI (v109) [ng/mL]        | 0.198095714 | SSC-PAH    | 57.59090909 | 44.84434358 | 21   | 29     | 40    | 70     | 206 | 0.939768375 |
| 604 | M-CSF (v184) [ng/mL]       | 0.19704281  | All        | 0.533636364 | 0.259418768 | 0.37 | 0.37   | 0.37  | 0.6025 | 1.3 | NA          |
| 605 | M-CSF (v184) [ng/mL]       | 0.19704281  | SSC-no PAH | 0.448181818 | 0.186027043 | 0.37 | 0.37   | 0.37  | 0.4625 | 1.2 | NA          |
| 606 | M-CSF (v184) [ng/mL]       | 0.19704281  | SSC-PAH    | 0.619090909 | 0.296469851 | 0.37 | 0.37   | 0.495 | 0.7875 | 1.3 | 0.015382442 |
| 607 | AAT (v007) [mg/mL]         | 0.196818015 | All        | 2.034090909 | 0.526923136 | 1.2  | 1.7    | 1.9   | 2.2    | 3.3 | NA          |
| 608 | AAT (v007) [mg/mL]         | 0.196818015 | SSC-no PAH | 1.881818182 | 0.530620808 | 1.2  | 1.6    | 1.8   | 2.075  | 3.2 | NA          |
| 609 | AAT (v007) [mg/mL]         | 0.196818015 | SSC-PAH    | 2.186363636 | 0.488238285 | 1.4  | 1.825  | 2.15  | 2.425  | 3.3 | 0.01708832  |
| 610 | Apo E (v027) [ug/mL]       | 0.195164005 | All        | 50.81818182 | 24.45144474 | 12   | 35.5   | 52    | 63.25  | 153 | NA          |
| 611 | Apo E (v027) [ug/mL]       | 0.195164005 | SSC-no PAH | 53          | 15.83546352 | 21   | 44     | 54.5  | 63.75  | 88  | NA          |
| 612 | Apo E (v027) [ug/mL]       | 0.195164005 | SSC-PAH    | 48.63636364 | 31.03998259 | 12   | 29.25  | 42    | 55.75  | 153 | 0.184616018 |
| 613 | SCF (v261) [pg/mL]         | 0.19346305  | All        | 410.1818182 | 127.7377897 | 222  | 323    | 368.5 | 489    | 762 | NA          |
| 614 | SCF (v261) [pg/mL]         | 0.19346305  | SSC-no PAH | 369.3181818 | 128.0455225 | 222  | 282    | 357.5 | 370.75 | 762 | NA          |
| 615 | SCF (v261) [pg/mL]         | 0.19346305  | SSC-PAH    | 451.0454545 | 116.2605765 | 262  | 372    | 442   | 520.5  | 744 | 0.016083089 |
| 616 | Progranulin (v238) [ng/mL] | 0.192393208 | All        | 16.57272727 | 8.391672606 | 5    | 11     | 15    | 20.25  | 52  | NA          |
| 617 | Progranulin (v238) [ng/mL] | 0.192393208 | SSC-no PAH | 14.84545455 | 6.414620745 | 5    | 11     | 14    | 17     | 30  | NA          |
| 618 | Progranulin (v238) [ng/mL] | 0.192393208 | SSC-PAH    | 18.3        | 9.838457099 | 8.6  | 11.25  | 15.5  | 21.75  | 52  | 0.264113652 |
| 619 | Tetranectin (v270) [ug/mL] | 0.191002032 | All        | 12.08636364 | 2.635587478 | 8.1  | 10     | 11.5  | 14     | 19  | NA          |
| 620 | Tetranectin (v270) [ug/mL] | 0.191002032 | SSC-no PAH | 12.76818182 | 2.884834957 | 8.1  | 11     | 13    | 15     | 19  | NA          |
| 621 | Tetranectin (v270) [ug/mL] | 0.191002032 | SSC-PAH    | 11.40454545 | 2.219711966 | 8.2  | 9.6    | 11    | 13     | 15  | 0.115187072 |
| 622 | TG (v277) [ng/mL]          | 0.186892342 | All        | 11.20454545 | 4.407074363 | 10   | 10     | 10    | 10     | 34  | NA          |
| 623 | TG (v277) [ng/mL]          | 0.186892342 | SSC-no PAH | 11.72727273 | 5.691947681 | 10   | 10     | 10    | 10     | 34  | NA          |

|     |                             |             |            |             |             |       |        |        |         |      |             |
|-----|-----------------------------|-------------|------------|-------------|-------------|-------|--------|--------|---------|------|-------------|
| 624 | TG (v277) [ng/mL]           | 0.186892342 | SSC-PAH    | 10.68181818 | 2.607431936 | 10    | 10     | 10     | 10      | 22   | 0.606920023 |
| 625 | BDNF (v035) [ng/mL]         | 0.184908373 | All        | 15.7        | 4.542614758 | 4.4   | 13.75  | 15.5   | 18.5    | 24   | NA          |
| 626 | BDNF (v035) [ng/mL]         | 0.184908373 | SSC-no PAH | 15.95454545 | 3.835638306 | 10    | 14.25  | 15.5   | 17      | 24   | NA          |
| 627 | BDNF (v035) [ng/mL]         | 0.184908373 | SSC-PAH    | 15.44545455 | 5.235021924 | 4.4   | 13.25  | 15.5   | 20      | 22   | 0.865778781 |
| 628 | TIE-2 (v296) [ng/mL]        | 0.184896794 | All        | 9.664318182 | 5.046898379 | 0.33  | 7.15   | 8.6    | 11      | 26   | NA          |
| 629 | TIE-2 (v296) [ng/mL]        | 0.184896794 | SSC-no PAH | 8.365       | 3.715270611 | 0.33  | 6.25   | 8.1    | 10      | 18   | NA          |
| 630 | TIE-2 (v296) [ng/mL]        | 0.184896794 | SSC-PAH    | 10.96363636 | 5.900407206 | 3.1   | 7.825  | 9.3    | 13      | 26   | 0.169197644 |
| 631 | AR (v011) [pg/mL]           | 0.180999409 | All        | 111         | 0           | 111   | 111    | 111    | 111     | 111  | NA          |
| 632 | AR (v011) [pg/mL]           | 0.180999409 | SSC-no PAH | 111         | 0           | 111   | 111    | 111    | 111     | 111  | NA          |
| 633 | AR (v011) [pg/mL]           | 0.180999409 | SSC-PAH    | 111         | 0           | 111   | 111    | 111    | 111     | 111  | NA          |
| 634 | C3 (v064) [mg/mL]           | 0.179021399 | All        | 0.964318182 | 0.212180241 | 0.65  | 0.8    | 0.915  | 1.1     | 1.6  | NA          |
| 635 | C3 (v064) [mg/mL]           | 0.179021399 | SSC-no PAH | 1.015909091 | 0.208158801 | 0.71  | 0.8775 | 0.985  | 1.1     | 1.5  | NA          |
| 636 | C3 (v064) [mg/mL]           | 0.179021399 | SSC-PAH    | 0.912727273 | 0.208033464 | 0.65  | 0.7925 | 0.86   | 0.9925  | 1.6  | 0.070323672 |
| 637 | Kallikrein 5 (v171) [ng/mL] | 0.177526005 | All        | 2.794772727 | 1.293684999 | 0.67  | 1.8    | 2.6    | 3.425   | 6    | NA          |
| 638 | Kallikrein 5 (v171) [ng/mL] | 0.177526005 | SSC-no PAH | 2.259090909 | 0.728115043 | 1.1   | 1.725  | 2.35   | 2.875   | 3.4  | NA          |
| 639 | Kallikrein 5 (v171) [ng/mL] | 0.177526005 | SSC-PAH    | 3.330454545 | 1.5151064   | 0.67  | 1.925  | 3.45   | 4.25    | 6    | 0.010322366 |
| 640 | VKDPS (v310) [ug/mL]        | 0.177234456 | All        | 20.70454545 | 5.542980247 | 10    | 16.75  | 22     | 24.25   | 31   | NA          |
| 641 | VKDPS (v310) [ug/mL]        | 0.177234456 | SSC-no PAH | 22.31818182 | 4.622783779 | 11    | 20.25  | 23     | 25.75   | 29   | NA          |
| 642 | VKDPS (v310) [ug/mL]        | 0.177234456 | SSC-PAH    | 19.09090909 | 6.007210674 | 10    | 14.25  | 18.5   | 23      | 31   | 0.080074927 |
| 643 | HER-2 (v127) [ng/mL]        | 0.176034524 | All        | 0.573409091 | 0.215049407 | 0.26  | 0.42   | 0.53   | 0.6525  | 1.3  | NA          |
| 644 | HER-2 (v127) [ng/mL]        | 0.176034524 | SSC-no PAH | 0.55        | 0.147454593 | 0.35  | 0.425  | 0.535  | 0.635   | 0.87 | NA          |
| 645 | HER-2 (v127) [ng/mL]        | 0.176034524 | SSC-PAH    | 0.596818182 | 0.267962086 | 0.26  | 0.4125 | 0.53   | 0.6575  | 1.3  | 0.995363716 |
| 646 | LGL (v175) [ng/mL]          | 0.175511352 | All        | 16.89090909 | 26.9151191  | 3.2   | 9.125  | 11     | 16      | 185  | NA          |
| 647 | LGL (v175) [ng/mL]          | 0.175511352 | SSC-no PAH | 12.46363636 | 7.375154265 | 5.5   | 9.1    | 10.5   | 14.75   | 42   | NA          |
| 648 | LGL (v175) [ng/mL]          | 0.175511352 | SSC-PAH    | 21.31818182 | 37.2542952  | 3.2   | 9.275  | 12     | 17.75   | 185  | 0.335102101 |
| 649 | VEGF-D (v303) [pg/mL]       | 0.172124985 | All        | 587.1590909 | 343.4851436 | 159   | 379    | 496    | 739.75  | 1910 | NA          |
| 650 | VEGF-D (v303) [pg/mL]       | 0.172124985 | SSC-no PAH | 415.9090909 | 171.1693422 | 159   | 256    | 449.5  | 517     | 745  | NA          |
| 651 | VEGF-D (v303) [pg/mL]       | 0.172124985 | SSC-PAH    | 758.4090909 | 388.3776585 | 291   | 481.75 | 713.5  | 838.5   | 1910 | 0.000178738 |
| 652 | KIM-1 (v173) [ng/mL]        | 0.167451482 | All        | 0.048159091 | 0.030989828 | 0.029 | 0.029  | 0.034  | 0.049   | 0.15 | NA          |
| 653 | KIM-1 (v173) [ng/mL]        | 0.167451482 | SSC-no PAH | 0.050590909 | 0.034540051 | 0.029 | 0.029  | 0.0315 | 0.05575 | 0.15 | NA          |
| 654 | KIM-1 (v173) [ng/mL]        | 0.167451482 | SSC-PAH    | 0.045727273 | 0.027587405 | 0.029 | 0.029  | 0.034  | 0.0475  | 0.14 | 0.946345402 |
| 655 | tPSA (v244) [ng/mL]         | 0.16671347  | All        | 0.493045455 | 1.112823205 | 0.031 | 0.031  | 0.031  | 0.031   | 5.3  | NA          |
| 656 | tPSA (v244) [ng/mL]         | 0.16671347  | SSC-no PAH | 0.291818182 | 0.858174898 | 0.031 | 0.031  | 0.031  | 0.031   | 3.4  | NA          |

|     |                            |             |            |             |             |       |        |        |        |      |             |
|-----|----------------------------|-------------|------------|-------------|-------------|-------|--------|--------|--------|------|-------------|
| 657 | tPSA (v244) [ng/mL]        | 0.16671347  | SSC-PAH    | 0.694272727 | 1.309357028 | 0.031 | 0.031  | 0.031  | 0.86   | 5.3  | 0.063589398 |
| 658 | A1Micro (v008) [ug/mL]     | 0.164847628 | All        | 18.17954545 | 6.784029795 | 5.9   | 14     | 17     | 19.25  | 44   | NA          |
| 659 | A1Micro (v008) [ug/mL]     | 0.164847628 | SSC-no PAH | 17.45454545 | 6.994741377 | 11    | 14     | 16     | 18.75  | 44   | NA          |
| 660 | A1Micro (v008) [ug/mL]     | 0.164847628 | SSC-PAH    | 18.90454545 | 6.649058456 | 5.9   | 14.25  | 18     | 21.5   | 35   | 0.229756942 |
| 661 | IL-10 (v159) [pg/mL]       | 0.159453404 | All        | 6.677272727 | 6.29465863  | 5.2   | 5.2    | 5.2    | 5.2    | 46   | NA          |
| 662 | IL-10 (v159) [pg/mL]       | 0.159453404 | SSC-no PAH | 5.890909091 | 2.15050583  | 5.2   | 5.2    | 5.2    | 5.2    | 15   | NA          |
| 663 | IL-10 (v159) [pg/mL]       | 0.159453404 | SSC-PAH    | 7.463636364 | 8.672482231 | 5.2   | 5.2    | 5.2    | 5.2    | 46   | 0.836103174 |
| 664 | TAFI (v271) [ug/mL]        | 0.159007488 | All        | 8.884090909 | 1.594021269 | 5.1   | 8      | 8.8    | 9.9    | 12   | NA          |
| 665 | TAFI (v271) [ug/mL]        | 0.159007488 | SSC-no PAH | 9.5         | 1.425615991 | 6.8   | 8.525  | 9.4    | 10.75  | 12   | NA          |
| 666 | TAFI (v271) [ug/mL]        | 0.159007488 | SSC-PAH    | 8.268181818 | 1.54130012  | 5.1   | 7.375  | 8.6    | 9.575  | 11   | 0.017957067 |
| 667 | Apo A-I (v020) [mg/mL]     | 0.157222375 | All        | 2.013636364 | 0.568797552 | 1.1   | 1.6    | 2      | 2.3    | 3.9  | NA          |
| 668 | Apo A-I (v020) [mg/mL]     | 0.157222375 | SSC-no PAH | 2.2         | 0.574870586 | 1.6   | 1.8    | 2.2    | 2.3    | 3.9  | NA          |
| 669 | Apo A-I (v020) [mg/mL]     | 0.157222375 | SSC-PAH    | 1.827272727 | 0.509137289 | 1.1   | 1.4    | 1.95   | 2.275  | 2.6  | 0.08015738  |
| 670 | SOD-1 (v263) [ng/mL]       | 0.150628639 | All        | 24.86363636 | 22.3262083  | 4.3   | 13.75  | 19.5   | 23.25  | 121  | NA          |
| 671 | SOD-1 (v263) [ng/mL]       | 0.150628639 | SSC-no PAH | 21.05909091 | 14.19391751 | 4.3   | 13.25  | 18.5   | 23     | 78   | NA          |
| 672 | SOD-1 (v263) [ng/mL]       | 0.150628639 | SSC-PAH    | 28.66818182 | 28.08665818 | 9.7   | 14     | 21     | 24.75  | 121  | 0.502009918 |
| 673 | MIP-3 alpha (v188) [pg/mL] | 0.148927467 | All        | 37.13636364 | 57.8569169  | 21    | 21     | 21     | 21.25  | 365  | NA          |
| 674 | MIP-3 alpha (v188) [pg/mL] | 0.148927467 | SSC-no PAH | 46.36363636 | 79.45681394 | 21    | 21     | 21     | 21     | 365  | NA          |
| 675 | MIP-3 alpha (v188) [pg/mL] | 0.148927467 | SSC-PAH    | 27.90909091 | 19.03858011 | 21    | 21     | 21     | 21.75  | 102  | 0.936782653 |
| 676 | CA-125 (v041) [U/mL]       | 0.14778135  | All        | 23.43181818 | 72.40082157 | 11    | 11     | 11     | 11     | 492  | NA          |
| 677 | CA-125 (v041) [U/mL]       | 0.14778135  | SSC-no PAH | 12.68181818 | 4.291590488 | 11    | 11     | 11     | 11     | 29   | NA          |
| 678 | CA-125 (v041) [U/mL]       | 0.14778135  | SSC-PAH    | 34.18181818 | 102.3368092 | 11    | 11     | 11     | 11     | 492  | 0.736902464 |
| 679 | HE4 (v119) [pM]            | 0.14445941  | All        | 1488.886364 | 886.7202232 | 536   | 862.75 | 1205   | 2045   | 4350 | NA          |
| 680 | HE4 (v119) [pM]            | 0.14445941  | SSC-no PAH | 1225.227273 | 652.2525754 | 540   | 658.75 | 1076.5 | 1472.5 | 2820 | NA          |
| 681 | HE4 (v119) [pM]            | 0.14445941  | SSC-PAH    | 1752.545455 | 1019.264848 | 536   | 930    | 1315   | 2525   | 4350 | 0.077233041 |
| 682 | GLP-1 total (v108) [pg/mL] | 0.138487138 | All        | 13.15681818 | 6.747795427 | 9.1   | 9.1    | 9.4    | 16.25  | 44   | NA          |
| 683 | GLP-1 total (v108) [pg/mL] | 0.138487138 | SSC-no PAH | 13.11363636 | 5.971782493 | 9.1   | 9.1    | 9.15   | 16.75  | 30   | NA          |
| 684 | GLP-1 total (v108) [pg/mL] | 0.138487138 | SSC-PAH    | 13.2        | 7.587332802 | 9.1   | 9.1    | 10.35  | 13.75  | 44   | 0.633487585 |
| 685 | FABP, liver (v092) [ng/mL] | 0.138027902 | All        | 35.02272727 | 4.432903591 | 34    | 34     | 34     | 34     | 61   | NA          |
| 686 | FABP, liver (v092) [ng/mL] | 0.138027902 | SSC-no PAH | 34.81818182 | 2.648204489 | 34    | 34     | 34     | 34     | 43   | NA          |
| 687 | FABP, liver (v092) [ng/mL] | 0.138027902 | SSC-PAH    | 35.22727273 | 5.756419342 | 34    | 34     | 34     | 34     | 61   | 1           |
| 688 | IgE (v129) [U/mL]          | 0.122469713 | All        | 40.43181818 | 105.3861996 | 14    | 14     | 14     | 14     | 622  | NA          |
| 689 | IgE (v129) [U/mL]          | 0.122469713 | SSC-no PAH | 33.27272727 | 75.76855851 | 14    | 14     | 14     | 14     | 370  | NA          |

|     |                            |             |            |             |             |       |       |       |         |       |             |
|-----|----------------------------|-------------|------------|-------------|-------------|-------|-------|-------|---------|-------|-------------|
| 690 | IgE (v129) [U/mL]          | 0.122469713 | SSC-PAH    | 47.59090909 | 129.9734988 | 14    | 14    | 14    | 14      | 622   | 0.86198162  |
| 691 | PSA-f (v243) [ng/mL]       | 0.115328247 | All        | 0.033818182 | 0.054488861 | 0.01  | 0.01  | 0.01  | 0.01    | 0.23  | NA          |
| 692 | PSA-f (v243) [ng/mL]       | 0.115328247 | SSC-no PAH | 0.023181818 | 0.04401151  | 0.01  | 0.01  | 0.01  | 0.01    | 0.19  | NA          |
| 693 | PSA-f (v243) [ng/mL]       | 0.115328247 | SSC-PAH    | 0.044454545 | 0.06249322  | 0.01  | 0.01  | 0.01  | 0.03775 | 0.23  | 0.060943181 |
| 694 | SCCA-1 (v259) [ng/mL]      | 0.104214398 | All        | 2.168181818 | 5.14771445  | 1.2   | 1.2   | 1.2   | 1.2     | 35    | NA          |
| 695 | SCCA-1 (v259) [ng/mL]      | 0.104214398 | SSC-no PAH | 1.204545455 | 0.021320072 | 1.2   | 1.2   | 1.2   | 1.2     | 1.3   | NA          |
| 696 | SCCA-1 (v259) [ng/mL]      | 0.104214398 | SSC-PAH    | 3.131818182 | 7.232821116 | 1.2   | 1.2   | 1.2   | 1.2     | 35    | 0.23255814  |
| 697 | S100-B (v252) [ng/mL]      | 0.101789231 | All        | 0.317954545 | 0.117068446 | 0.2   | 0.215 | 0.29  | 0.3975  | 0.69  | NA          |
| 698 | S100-B (v252) [ng/mL]      | 0.101789231 | SSC-no PAH | 0.260909091 | 0.077883252 | 0.2   | 0.2   | 0.23  | 0.29    | 0.43  | NA          |
| 699 | S100-B (v252) [ng/mL]      | 0.101789231 | SSC-PAH    | 0.375       | 0.123201345 | 0.2   | 0.275 | 0.345 | 0.4275  | 0.69  | 0.000336116 |
| 700 | IL-12p40 (v160) [ng/mL]    | 0.099755154 | All        | 0.504772727 | 0.105422486 | 0.45  | 0.45  | 0.45  | 0.4975  | 0.89  | NA          |
| 701 | IL-12p40 (v160) [ng/mL]    | 0.099755154 | SSC-no PAH | 0.490454545 | 0.088880727 | 0.45  | 0.45  | 0.45  | 0.45    | 0.74  | NA          |
| 702 | IL-12p40 (v160) [ng/mL]    | 0.099755154 | SSC-PAH    | 0.519090909 | 0.120115385 | 0.45  | 0.45  | 0.45  | 0.5275  | 0.89  | 0.263506685 |
| 703 | IFN-alpha (v140) [ng/mL]   | 0.094671477 | All        | 0.037113636 | 0.000753778 | 0.037 | 0.037 | 0.037 | 0.037   | 0.042 | NA          |
| 704 | IFN-alpha (v140) [ng/mL]   | 0.094671477 | SSC-no PAH | 0.037227273 | 0.001066004 | 0.037 | 0.037 | 0.037 | 0.037   | 0.042 | NA          |
| 705 | IFN-alpha (v140) [ng/mL]   | 0.094671477 | SSC-PAH    | 0.037       | 0           | 0.037 | 0.037 | 0.037 | 0.037   | 0.037 | 1           |
| 706 | FABP, heart (v091) [ng/mL] | 0.08146149  | All        | 9.440909091 | 1.347921429 | 9.2   | 9.2   | 9.2   | 9.2     | 18    | NA          |
| 707 | FABP, heart (v091) [ng/mL] | 0.08146149  | SSC-no PAH | 9.2         | 0           | 9.2   | 9.2   | 9.2   | 9.2     | 9.2   | NA          |
| 708 | FABP, heart (v091) [ng/mL] | 0.08146149  | SSC-PAH    | 9.681818182 | 1.897024327 | 9.2   | 9.2   | 9.2   | 9.2     | 18    | 0.488372093 |
| 709 | VEGFR-1 (v304) [pg/mL]     | 0.075484144 | All        | 296.1818182 | 44.89329609 | 286   | 286   | 286   | 286     | 554   | NA          |
| 710 | VEGFR-1 (v304) [pg/mL]     | 0.075484144 | SSC-no PAH | 286         | 0           | 286   | 286   | 286   | 286     | 286   | NA          |
| 711 | VEGFR-1 (v304) [pg/mL]     | 0.075484144 | SSC-PAH    | 306.3636364 | 62.5266004  | 286   | 286   | 286   | 286     | 554   | 0.23255814  |
| 712 | HB-EGF (v122) [pg/mL]      | 0.075047085 | All        | 39.39090909 | 21.07346859 | 8.2   | 24.75 | 34.5  | 49      | 121   | NA          |
| 713 | HB-EGF (v122) [pg/mL]      | 0.075047085 | SSC-no PAH | 43.90909091 | 25.54530819 | 11    | 26.25 | 35    | 58.75   | 121   | NA          |
| 714 | HB-EGF (v122) [pg/mL]      | 0.075047085 | SSC-PAH    | 34.87272727 | 14.62854945 | 8.2   | 24.25 | 32.5  | 43      | 65    | 0.347953916 |
